# Supplementary material
Source: PubMed Central journal article supplement (PMC3051252)
Supplement: supp_tpc.110.075911_Lee_Supplemental_Data_final.pdf [file supp_tpc.110.075911_Lee_Supplemental_Data_final.pdf]

**A**

| Group             | FN alleles                       |
|-------------------|----------------------------------|
| <i>flc</i>        | 17, 102, 116, 215                |
| <i>fri</i>        | 13, 14, 221, 233, 236            |
| <i>suf1/hua2</i>  | 8, 109, 208, 234                 |
| <i>suf2/abh1</i>  | 4, 223                           |
| <i>suf3/arp6</i>  | 6, 7, 19, 24, 108, 115, 202, 225 |
| <i>suf4</i>       | 25                               |
| <i>suf5/flx</i>   | 22                               |
| <i>suf6</i>       | 15                               |
| <i>suf7</i>       | 16                               |
| <i>suf8/frl1</i>  | 103                              |
| <i>suf9</i>       | 126                              |
| <i>suf10/efs</i>  | 207                              |
| <i>suf11/vip5</i> | 204, 224                         |
| <i>suf12/vip4</i> | 212                              |

**B**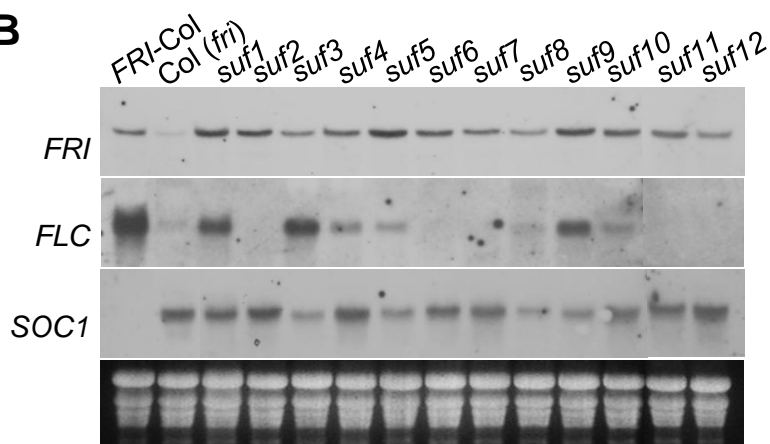

### Supplemental Figure 1. Grouping of *suf* mutants and *FLC* expression

(A) Grouping of the *suf* mutants. The *suf* mutants were grouped into 12 loci.

(B) The RNA blots showing the expression of *FRI*, *FLC*, and *SOC1* in *suf* mutants. All of the *suf* mutants showed reduced *FLC* expression and, as a consequence, an increase in the expression of *SOC1*, a flowering pathway integrator, resulting in the early flowering of *suf* mutants. The *suf4*, *suf5/flx*, *suf8/frl1* and *suf10/efs* show a small level of transcription, similar to *Col*, while *suf2*, *suf6*, *suf7*, *suf11* and *suf12* did not produce detectable RNA transcripts. The *suf1*, *suf3* and *suf9* mutants still maintain approximately 30 % of the *FLC* transcripts.

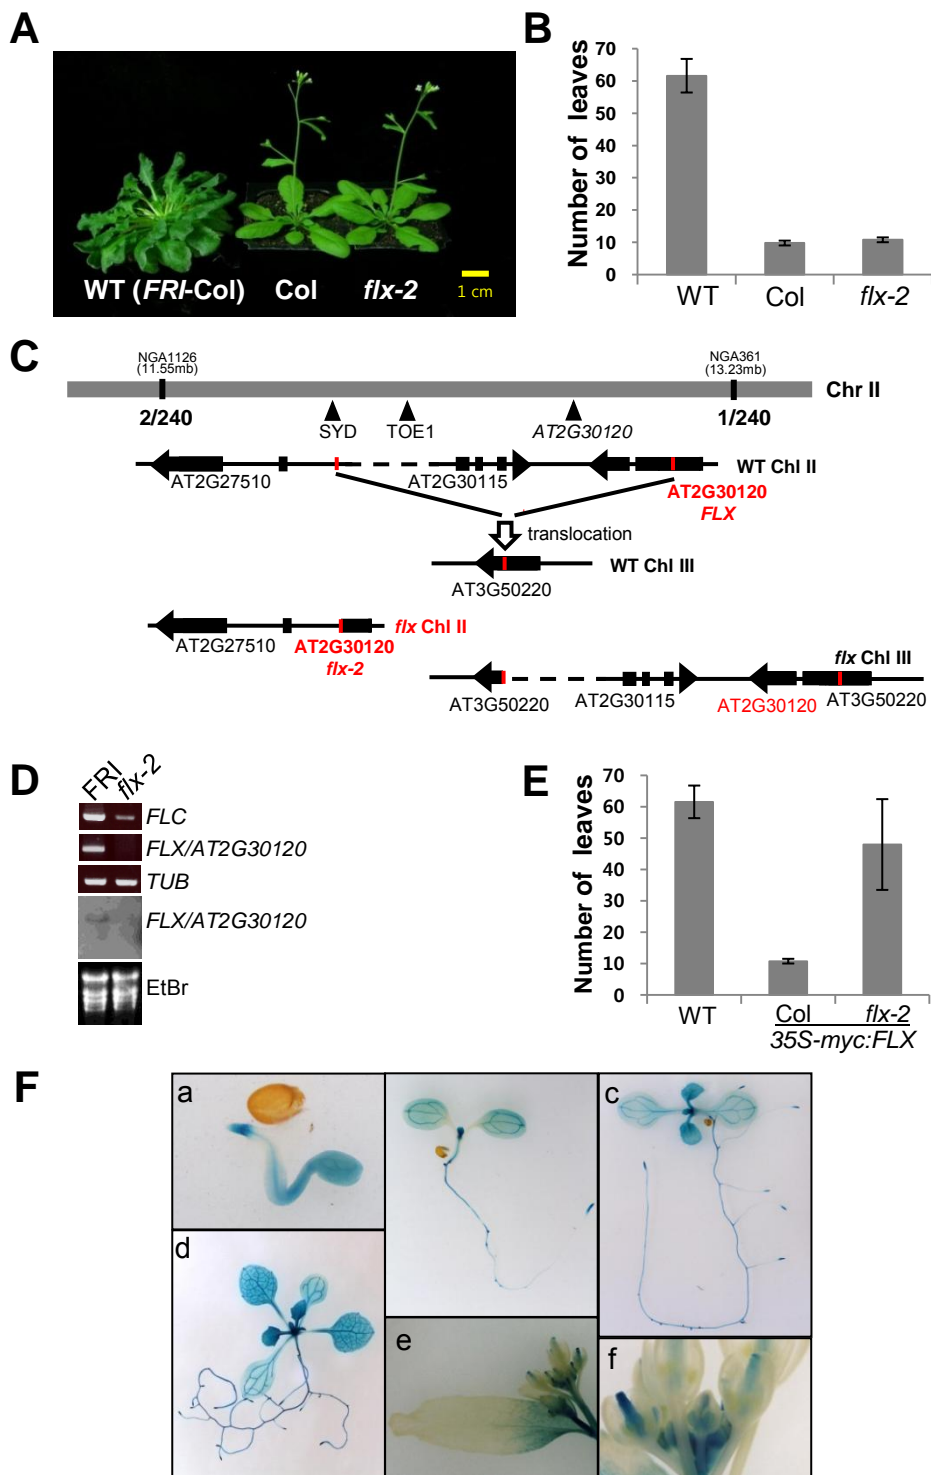

### Supplemental Figure 2. Characterization of *flx-2* and the expression patterns of *FLX*

(A) Phenotype of wild type plants (*FRI-Col*), Col, and *flx-2* grown for 40 or 30 days under long days.

(B) Flowering time of wild type, Col, and *flx-2* plants.

(C) Map-based cloning and chromosomal structure of *flx-2*.

(D) RT-PCR analysis of *FLC* and *FLX* and RNA blot of *FLX* in wild type and *flx-2* mutant.

(E) Flowering time of transgenic plants expressing myc tagged *FLX* in the *flx-2* and Col backgrounds.

(F) Expression patterns of *FLX* in transgenic plants expressing translational fusion, GUS-*FLX*. GUS detections in transgenic plants grown for 3 days after germination (DAG) (a), 6 DAG (b), 9 DAG (c), and 12 DAG (d). GUS detections in the axillary bud and flowers (e), and inflorescence and flower (f).

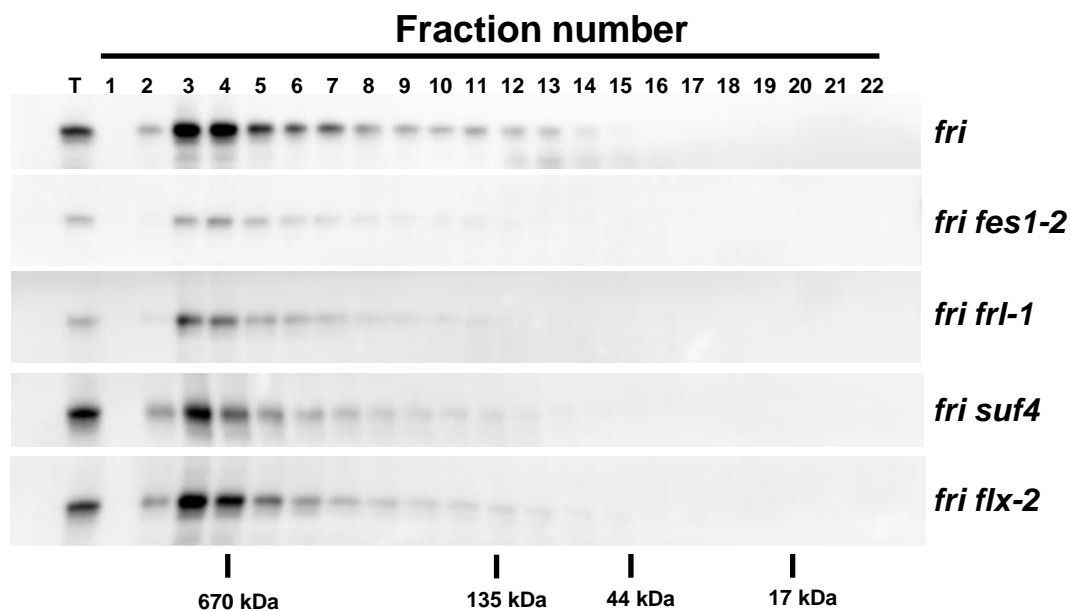

**Supplemental Figure 3. Gel filtration analysis of myc:FRI proteins expressed in the *fes1*, *frl1*, *suf4* and *flx* mutant backgrounds**  
 Homozygotes of *35S-myc:FRI fri* (Col) were crossed with each double mutant of *fri fes1-2*, *fri frl1-2*, *fri suf4*, and *fri flx-2*. The homozygotic F3 plants of *35S-myc:FRI fri* in each mutant background were selected and used for gel filtration analysis. The T of first lane indicates the input control in the protein gel blots.

**A**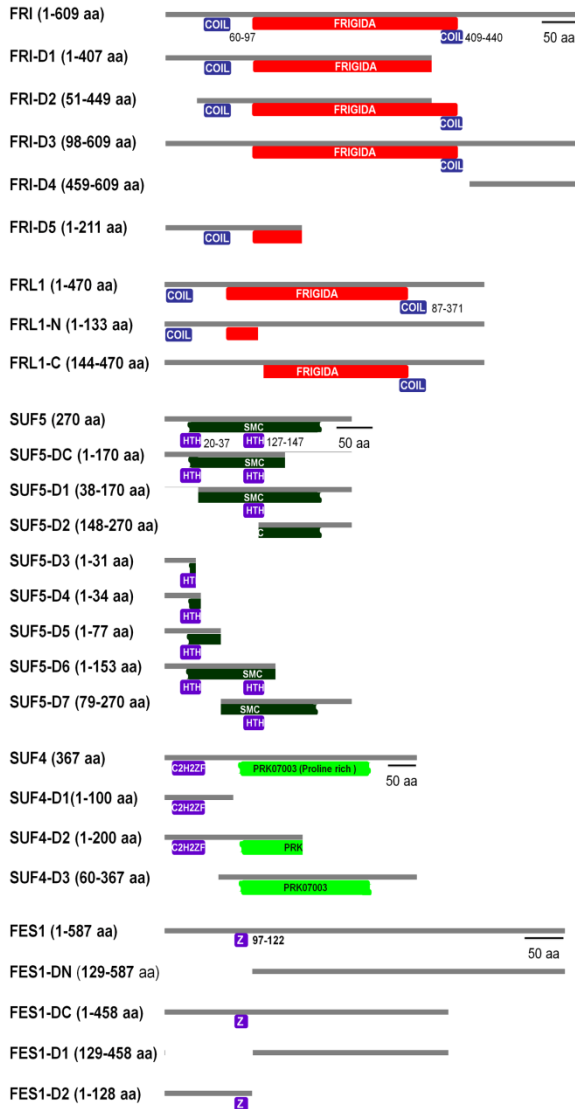**B**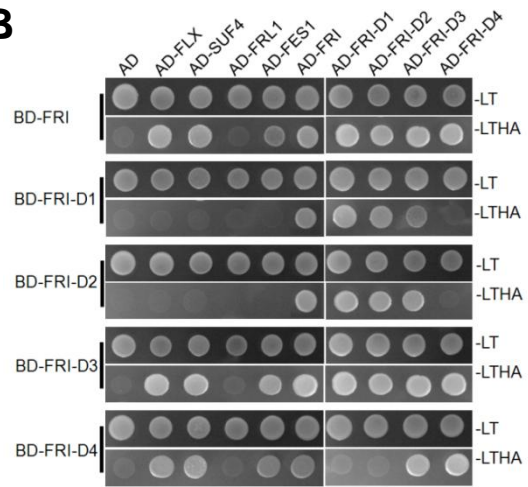**C**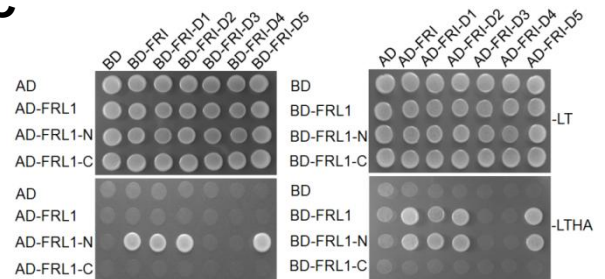**D**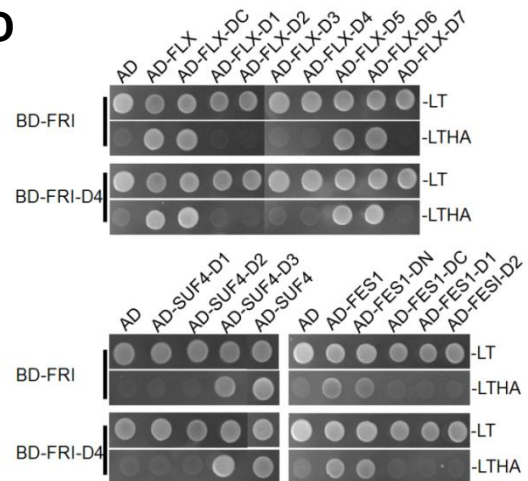

### Supplemental Figure 4. Yeast two hybrid interaction analyses among the deletion forms of FRI, FRL1, FLX, SUF4, and FES1

(A) Diagrams of the secondary structures of FRI, FRL1, FLX, SUF4 and FES1, showing the specific domains and truncated regions that were used in the Y2H analysis (B-D). The blue colored COIL indicates the coiled-coil motifs in FRI and FRL1. The FRIGIDA domain is shown in red. In FLX, the SMC motif is shown in dark green and the HTH domain is shown in purple. In SUF4, two C2H2 type zinc finger motifs are shown in purple, and the proline-rich region PRK07003 is shown in green. In FES1, the CCCH type zinc finger motif is shown in purple.

(B) The C-terminal region of the FRI protein binds to FLX, SUF4, and FES1.

(C) The interaction between FRI and FRL1 requires their N terminal coiled-coil motifs.

(D) The N-terminus of FLX and the C-termini of SUF4 and FES1 physically interact with FRI-CTR.

**A**

MEMPPVTSSSYSPYDRSFPSQRDDQDEISALVSSYLGPPSTSFPH  
 HRSRRSP EYMVPLPHGGLGRSVYAYEHLAPNSYSPGHGHLHRQ  
 YSPSLVHGQRHPLQYSPPIHGQQQLPYGIQVRVYRHSPEERYLGL  
 SNQRS PRSNSSLDPK

**B**

MEMPPVTSSSYSPYDRSFPSQRDDQDEISALVSSYLGPPSTSFPHRSRRSP EYMVPLPHGGLGRSVYAYEHLAPNSY 80  
 PGHGHRLHRQYSPSLVHGQRHPLQYSPPIHGQQQLPYGIQVRVYRHSPEERYLGLSNQRS PRSNSSLDPK 160  
 .....S.S.Y...S.S.....S.....S.S.Y.....S..... 80  
 .....S.S.Y...S.S.S.S..... 160

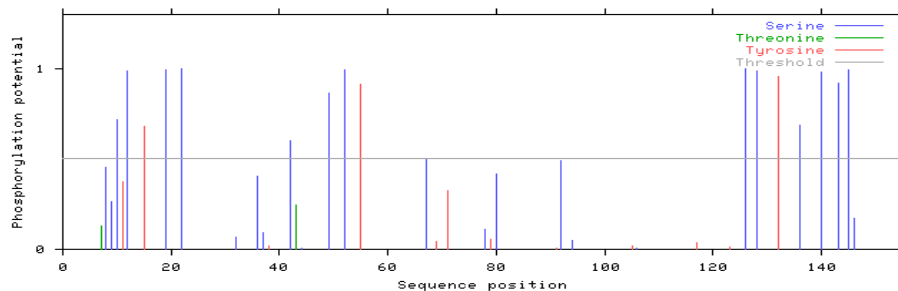

**C**

ABY51872 EGVDEKESASSMLTSLFRNSKESFERIKRKAQSPFAFKEAAKQALAAALSSVMRQETHIKLIDRAKELPGWQIQEQVNLKEDITLQDRIVEEKAR  
 AAZ92551 EGVDEKESASSMLTSLFRNSKESFERIKRKAQSPFAFKEAAKQALAAALSSVMRQETHIKLIDRAKELPGWQIQEQVNLKEDITLQDRIVEEKAR  
 FRI EGVDEKESASSMLTSLFRNSKESFERIKRKAQSPFAFKEAAKQALAAALSSVMRQETHIKLIDRAKELPGWQIQEQVNLKEDITLQDRIVEEKAR  
 AAY90142 EGVDEKESASSMLTSLFRNSKESFERIKRKAQSPFAFKEAAKQALAAALSSVMRQETHIKLIDRAKELPGWQIQEQVNLKEDITLQDRIVEEKAR  
 EEF51656 EGVDEKESASSMLTSLFRNSKESFERIKRKAQSPFAFKEAAKQALAAALSSVMRQETHIKLIDRAKELPGWQIQEQVNLKEDITLQDRIVEEKAR  
 XP\_002283789 EGVDEKESASSMLTSLFRNSKESFERIKRKAQSPFAFKEAAKQALAAALSSVMRQETHIKLIDRAKELPGWQIQEQVNLKEDITLQDRIVEEKAR  
 NP\_001060162 EGVDEKESASSMLTSLFRNSKESFERIKRKAQSPFAFKEAAKQALAAALSSVMRQETHIKLIDRAKELPGWQIQEQVNLKEDITLQDRIVEEKAR  
 NP\_00114176 EGVDEKESASSMLTSLFRNSKESFERIKRKAQSPFAFKEAAKQALAAALSSVMRQETHIKLIDRAKELPGWQIQEQVNLKEDITLQDRIVEEKAR

ABY51872 SLSLVEEAMAKRRVYQVQKRRRLSIVEMPPVASSSYSPYDRSFPSQRDDQDEISALVSSYLGPPSTSFPHRSRRSP EYMVPLPHGGLGRSVYAYEHLAPNSY 80  
 AAZ92551 SLSLVEEAMAKRRVYQVQKRRRLSIVEMPPVASSSYSPYDRSFPSQRDDQDEISALVSSYLGPPSTSFPHRSRRSP EYMVPLPHGGLGRSVYAYEHLAPNSY 80  
 FRI SLSLVEEAMAKRRVYQVQKRRRLSIVEMPPVASSSYSPYDRSFPSQRDDQDEISALVSSYLGPPSTSFPHRSRRSP EYMVPLPHGGLGRSVYAYEHLAPNSY 80  
 AAY90142 SLSLVEEAMAKRRVYQVQKRRRLSIVEMPPVASSSYSPYDRSFPSQRDDQDEISALVSSYLGPPSTSFPHRSRRSP EYMVPLPHGGLGRSVYAYEHLAPNSY 80  
 EEF51656 RELLADITGNTTGSNVSATGHWGGDASITDQIRGGQLVHQSISGGLFQPP--SIFGAGLPNSPFGAANQSSASDLYREADAVK--  
 XP\_002283789 LKRAAEIDSLKRWKTRERLQISPEAAP--SSVIGLQRVADNVAASFSYDSITMPLNPLGPPGPHLSTIYMAAALMHSGGGSLPENITGMT  
 NP\_001060162 LEAGRHAKKPRTFNSAARPPNPVGSAGRRPFGAGTWORPPPPMPS-----LPPDRYGHADRYHYTTPASATDPPD  
 NP\_00114176 SDAGRTYAKKPRPGGISFPRPAGSIVGSAAARRPFGAGTWORAPAPMPSRGPAPVPSRAPLPPAPLPDRYGAADRYHYTTPAPADSG

ABY51872 .....LPPGGLGRSVYAYEHLAPNSYSPGHGHLHRQYSPSLVHGQRHPRQYSPPIHGQQQLPYGIQVRVYRHSPEERYLGLSNQRS PRSNSSLDPK  
 AAZ92551 .....LPPGGLGRSVYAYEHLAPNSYSPGHGHLHRQYSPSLVHGQRHPRQYSPPIHGQQQLPYGIQVRVYRHSPEERYLGLSNQRS PRSNSSLDPK  
 FRI .....LPPGGLGRSVYAYEHLAPNSYSPGHGHLHRQYSPSLVHGQRHPRQYSPPIHGQQQLPYGIQVRVYRHSPEERYLGLSNQRS PRSNSSLDPK  
 AAY90142 .....LPPGGLGRSVYAYEHLAPNSYSPGHGHLHRQYSPSLVHGQRHPRQYSPPIHGQQQLPYGIQVRVYRHSPEERYLGLSNQRS PRSNSSLDPK  
 EEF51656 .....LPPGGLGRSVYAYEHLAPNSYSPGHGHLHRQYSPSLVHGQRHPRQYSPPIHGQQQLPYGIQVRVYRHSPEERYLGLSNQRS PRSNSSLDPK  
 XP\_002283789 SSGSGSGTRVHGTGTGPGMAGTGGVPPVNASFSGAGHEMLFDRTGQMKNNKNGPYV--AARRD--MGENDRVIIGSFLIAPHPASMGVDSLEFPPSISMSF  
 NP\_001060162 .....AYASVSEPPSASAPVQITL.....SVAASNSNS--SFKVAKGCGP-----APVRS--V  
 NP\_00114176 .....AFSSVSEPPSAPRPFQITL.....SVAASNSNS--SFKVAKGCGP-----APVRS--V

ABY51872 LGLSNQRS PRSNSSLDPK-----Arabidopsis lyrata  
 AAZ92551 LGLSNQRS PRSNSSLDPK-----Arabidopsis arenosa  
 FRI LGLSNQRS PRSNSSLDPK-----Arabidopsis thaliana  
 AAY90142 LTLPHRSR PRSNSSLDHIGM-----Thellungiella halophila  
 EEF51656 LGLSNQRS PRSNSSLDPK-----Ricinus communis  
 XP\_002283789 PCCPAPAPSLNAANGSSASDLYQFADAVFGRVitis vinifera  
 NP\_001060162 GSYNDAAGOSTSSYSGSYGYPPLRL--Oryza sativa  
 NP\_00114176 PLYASASGVAASSYANYNGSVYRPPQOP--Zea mays

**Supplemental Figure 5. Characteristics of the C-terminal 150 amino acids of FRI**

(A) The amino acid composition and the abundant prolines of FRI-CTR (aa 459-609). Green indicates hydrophilic, basic (+charge) amino acids (24 aa); blue, hydrophilic, polar (OH-) (53 aa); red, hydrophilic, acid (- charge) (12 aa); black, hydrophobic (61 aa). FRI-CTR includes 19 of the total 42 prolines of FRI (aa 1-609).

(B) Predicted phosphorylation sites in FRI-CTR. FRI-CTR contains 14 or 15 putative phosphoserines and 3 putative phospho-tyrosines which were predicted using NetPhos 2.0 (<http://www.cbs.dtu.dk/services/NetPhos/>).

(C) The alignment of the C-terminal regions of the FRI homologs in different plant species. GenBank accession numbers are as follows: ABY51872, AAZ92551, and AAY90142 for *Arabidopsis lyrata*, *Arabidopsis arenosa*, and *T.halophial*, respectively; EEF51656 for castorbean (*Ricinus communis*); XP\_002283789 for grape (*Vitis vinifera*); NP\_001060162 for rice (*Oryza sativa*); and NP\_001141761 for maize (*Zea mays*). The C-terminal region (aa 381-609) of *Arabidopsis thaliana* FRI was aligned with the corresponding C-terminal regions of homologs of different species by CLUSTALW (<http://seqtool.sdsc.edu/CGI/BW.cgi>) and then the alignment was illustrated using BOXSHADE 3.21 ([http://www.ch.embnet.org/software/BOX\\_form.html](http://www.ch.embnet.org/software/BOX_form.html)). Dots indicate the predicted phosphorylated sites of FRI in *Arabidopsis thaliana* shown in (B)

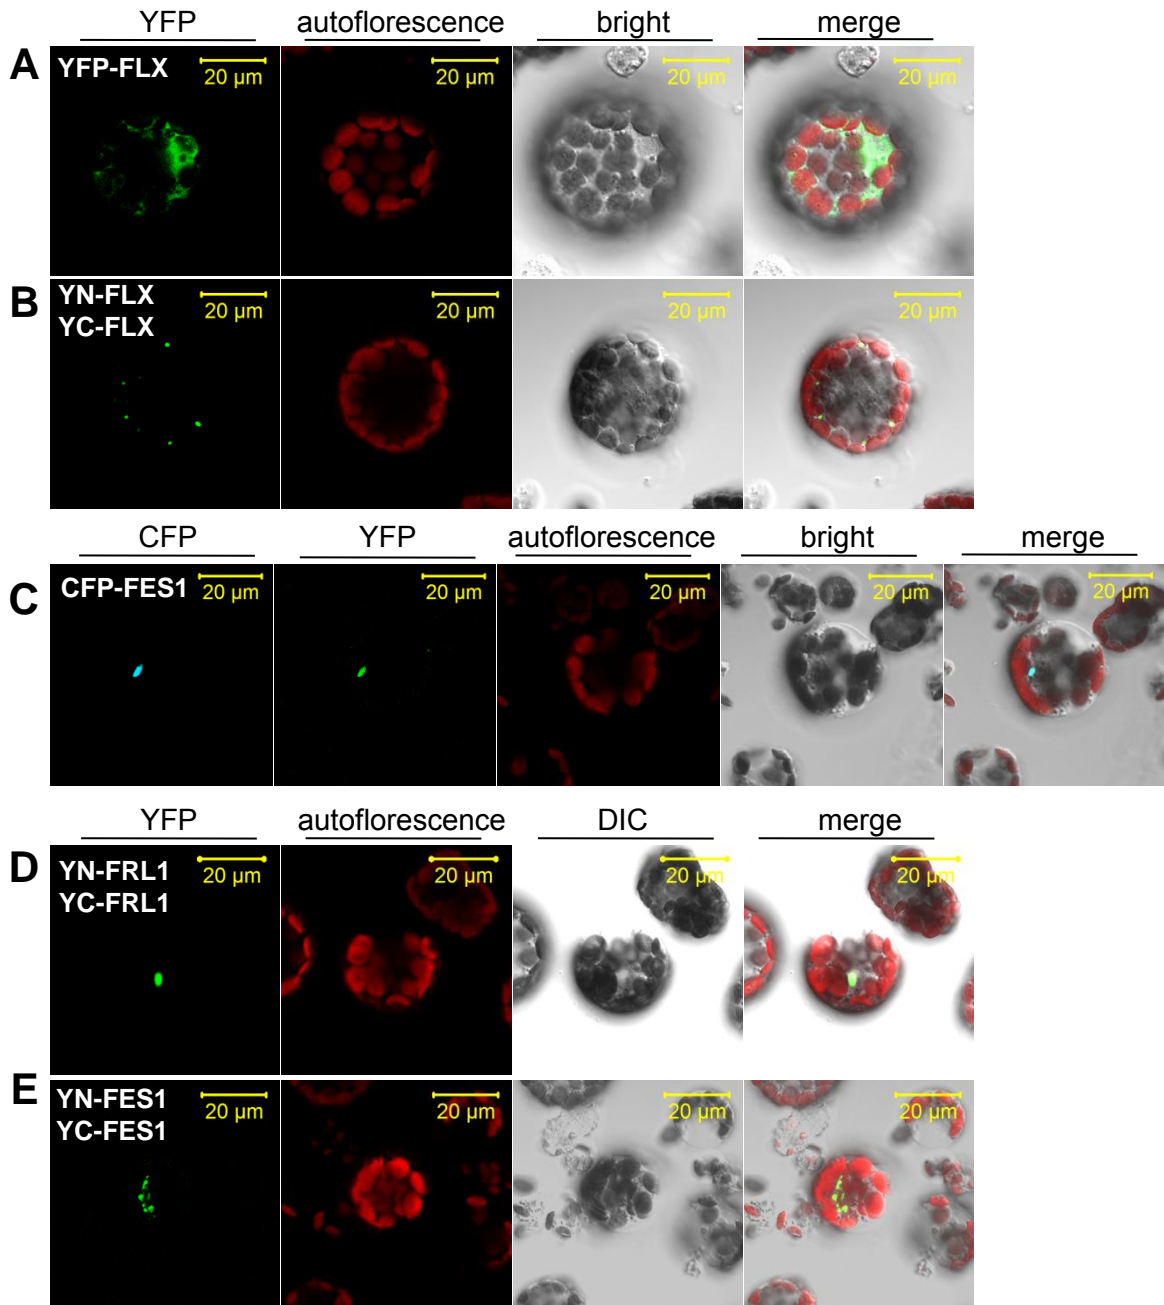

### Supplemental Figure 6. Localization of FLX, FRL1, and FES1

(A) Localization of YFP-FLX proteins in the protoplast transient assays.

(B) BiFC analysis showing the FLX homodimer in protoplasts expressing both YN-FLX and YC-FLX.

(C) Colocalization analysis of protoplasts expressing CFP-FES1, YN-FLX, and YC-FLX.

(D, E) BiFC analysis displaying the FRL1 and FES1 homodimer in protoplasts expressing YN-FRL1/YC-FRL1 (D) and YN-FES1/YC-FES1 (E).

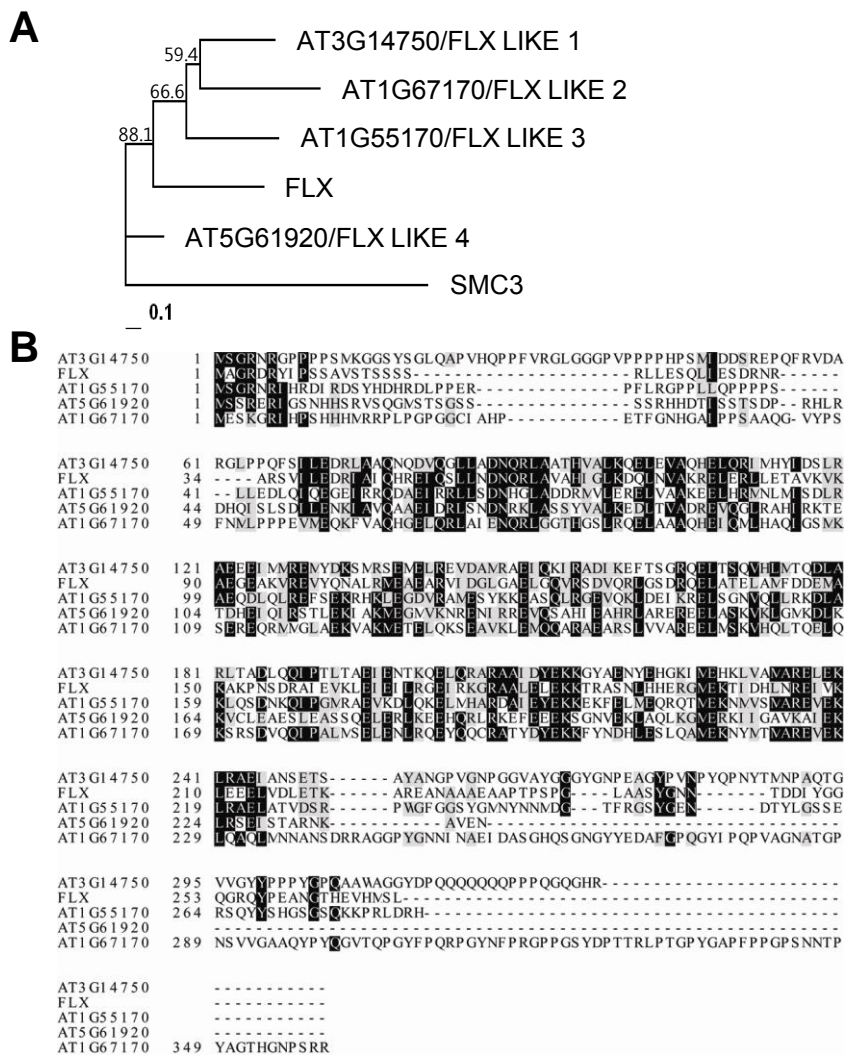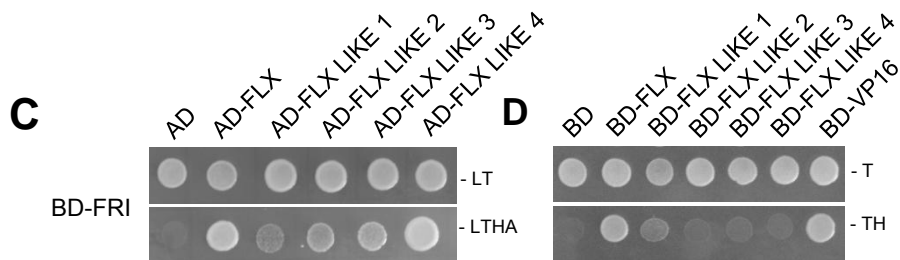

### Supplemental Figure 7. FLX like genes in Arabidopsis thaliana

(A) Phylogenetic tree of four FLX like proteins with a SMC3 homolog in Arabidopsis drawn by PHYLIP program. Bootstrap values from 1000 trials are shown and the scale bar for branch length are shown in lower panel. The SMC3 is used as outgroup.

(B) Alignment of the deduced amino acid sequences of four FLX like proteins and FLX. The conserved middle region is similar to the N terminal portion of the SMC domain identified in the SMC proteins.

(C) Yeast two hybrid analysis used to determine the interactions between FRI and FLX-like proteins. FLX like proteins also bind to FRI.

(D) Yeast one hybrid analysis used to monitor the transcriptional activity of FLX like proteins. FLX alone has a strong transcriptional activity in yeast.

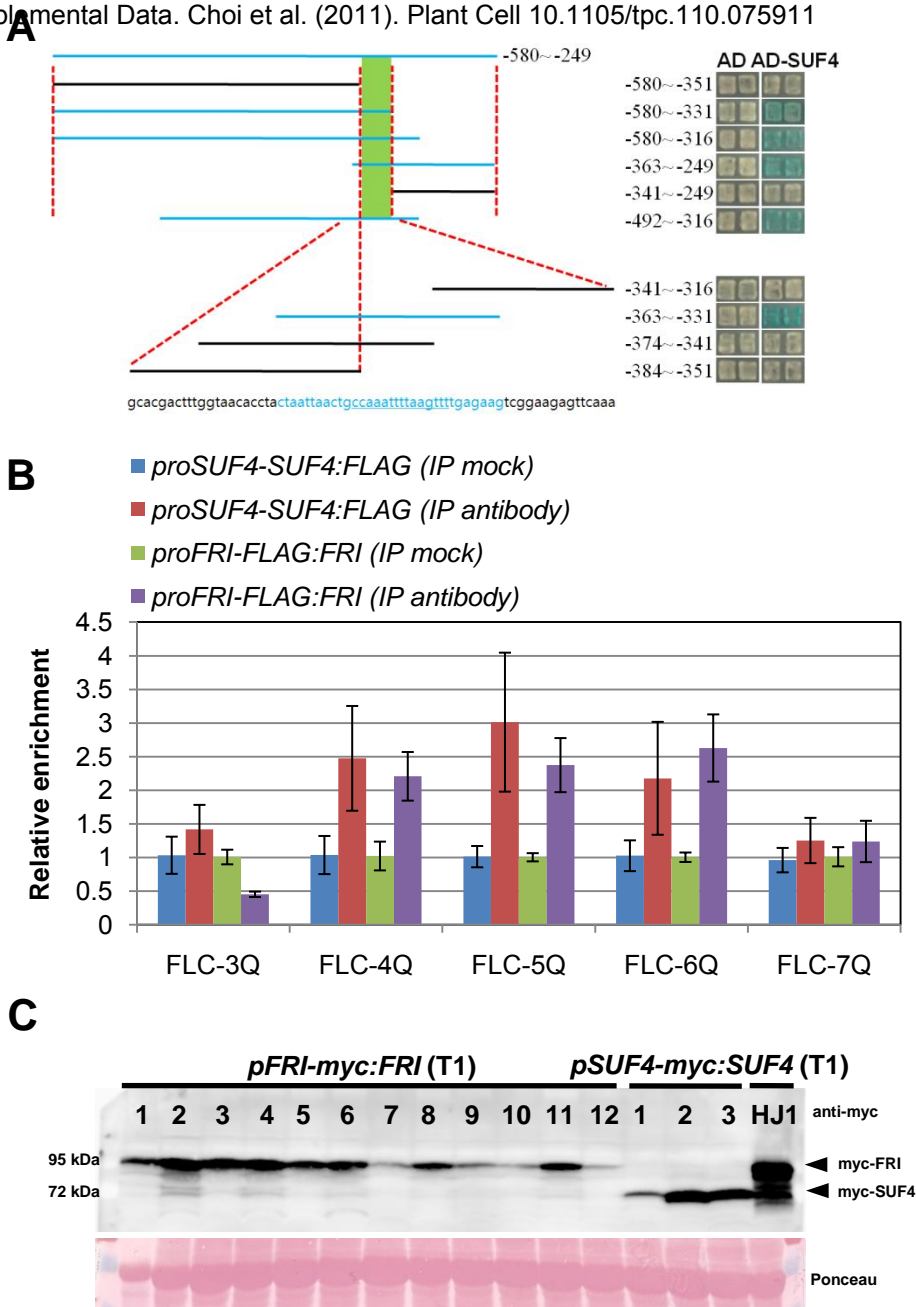

### Supplemental Figure 8. SUF4 binding to the *FLC* promoter *in vitro* and *in vivo*

(A) Diagrams for the search for the *FLC* promoter *cis*-element that binds SUF4 by yeast one hybrid analysis. Blue lines indicate the promoter regions that provided blue colonies on Y1H plates. The green box indicates the minimal region required for SUF4 binding to the *FLC* promoter. The numbers indicate the distance from the transcriptional start site. The *FLC* promoter sequence from -384 to -316 is represented below.

(B) ChIP-quantitative PCR analysis with epitope tagged transgenic plants of *proSUF4-SUF4:FLAG suf4* and *proFRI-FLAG:FRI fri*. Mock indicates immunoprecipitation without the FLAG antibody. FLC-3Q~7Q indicates the primer sequences from the *FLC* promoter, as shown in Figure 5C. The *TUB2* promoter region was used for the normalization of the qPCR. Error bars indicate the SDs of triplicate experiments.

(C) Western blot data for *pFRI-myc:FRI* transgenic plants. The protein was extracted from the adult leaves of individual transgenic lines. HJ1 (*35S-myc:FRI*) transgenic plants were used as a positive control. The protein from *pSUF4-myc:SUF4*, which was used for the ChIP experiment in B is also presented.



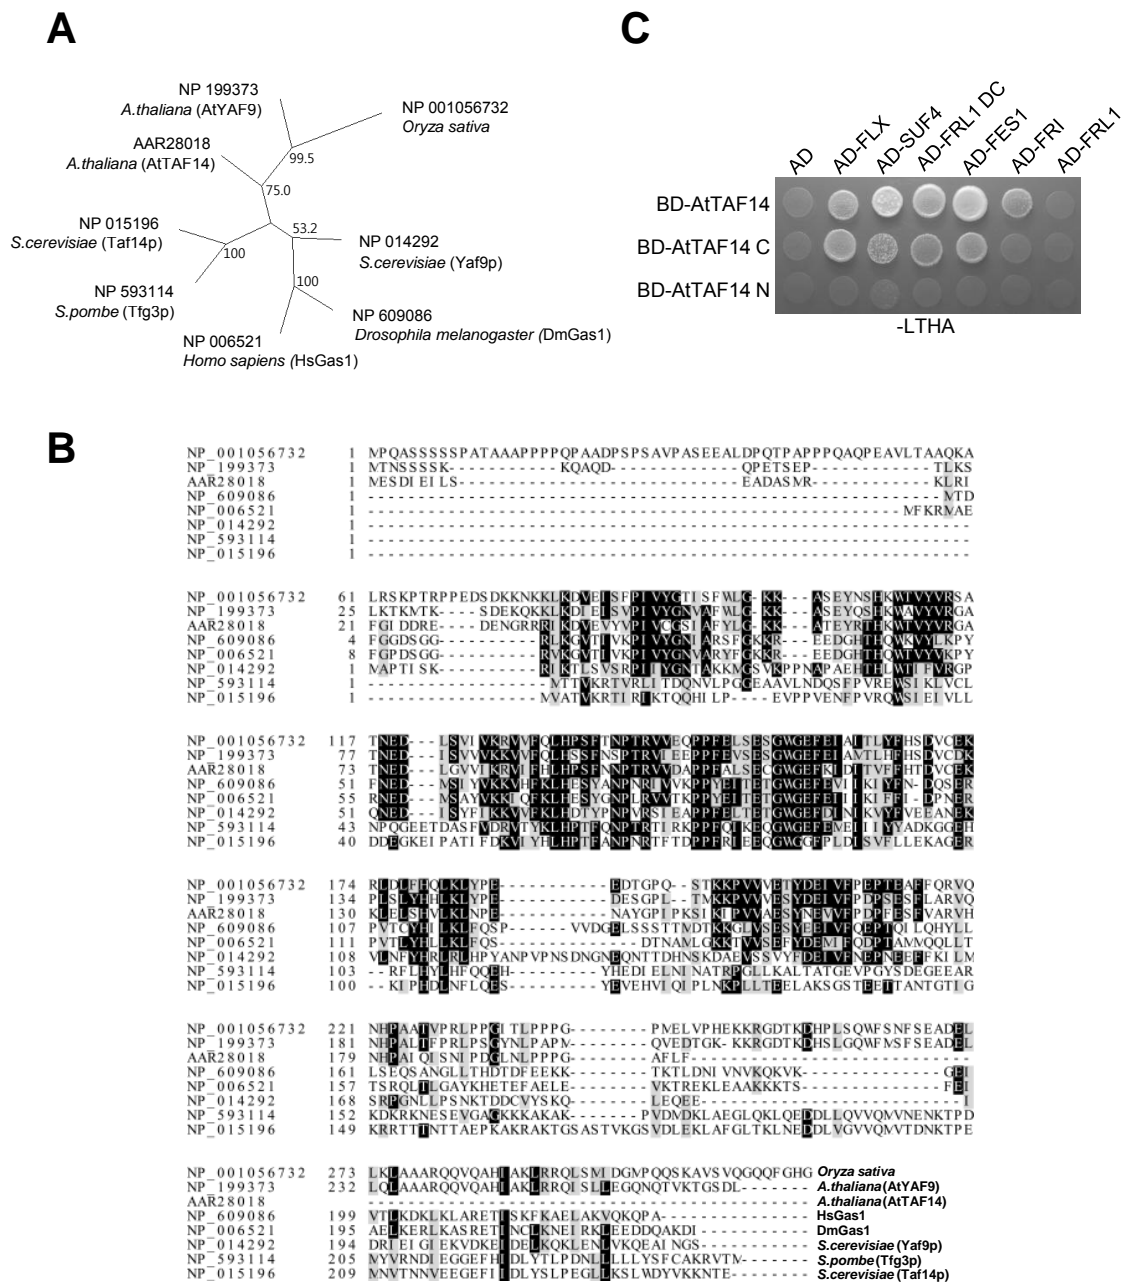

## Supplemental Figure 9. YEATS containing proteins in different organisms

(A) Phylogenetic tree of YEATS containing proteins from *Arabidopsis thaliana* (AAR28018 and NP199373), *Saccharomyces cerevisiae* (Yaf9p, NP 014292 and Taf14p, NP 015196), *Saccharomyces pombe* (Tfg3p, NP 593114), *Oryza sativa* (NP 001056732), *Drosophila melanogaster* (DmGas1, NP609086) and *Homo sapiens* (HsGas1, NP006521). The phylogenetic tree is drawn using PHYLIP program. The bootstrap values from 1000 trials are shown.

(B) The alignment of the deduced amino acid sequences of the YEATS containing proteins from Arabidopsis, yeast, fruit fly, and human that is shown in (A). The highly conserved region indicates the YEATS domain.

(C) The Y2H analysis between AtTAF14 and FRI-C, FLX, SUF4, FES1, and FRL1 shows interaction with the C-terminal region (aa 114-202) of AtTAF14, while FRI requires the entire AtTAF14 protein for the interaction. AtTAF14 can bind to the N terminal fragment of FRL1, which supports the BiFC result (Figure 7A).

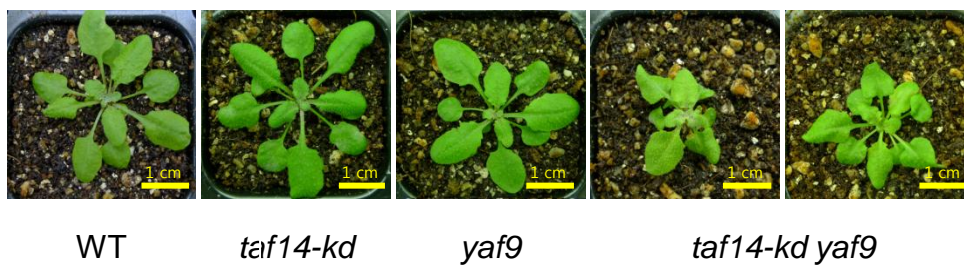

### Supplemental Figure 10. Phenotype of *atyaf9* and *attaf14-kd* plants

Morphology of 3-weeks-old mutant lines, *taf14* knock-down (kd), *yaf9* (salk\_075203), and *taf14-kd yaf9*, respectively. The *taf14-kd* and *yaf9* show the same phenotype as the wild type, but *taf14-kd yaf9* double mutants show an ectopic phenotype of growth retardation and a wrinkled-leaf morphology.

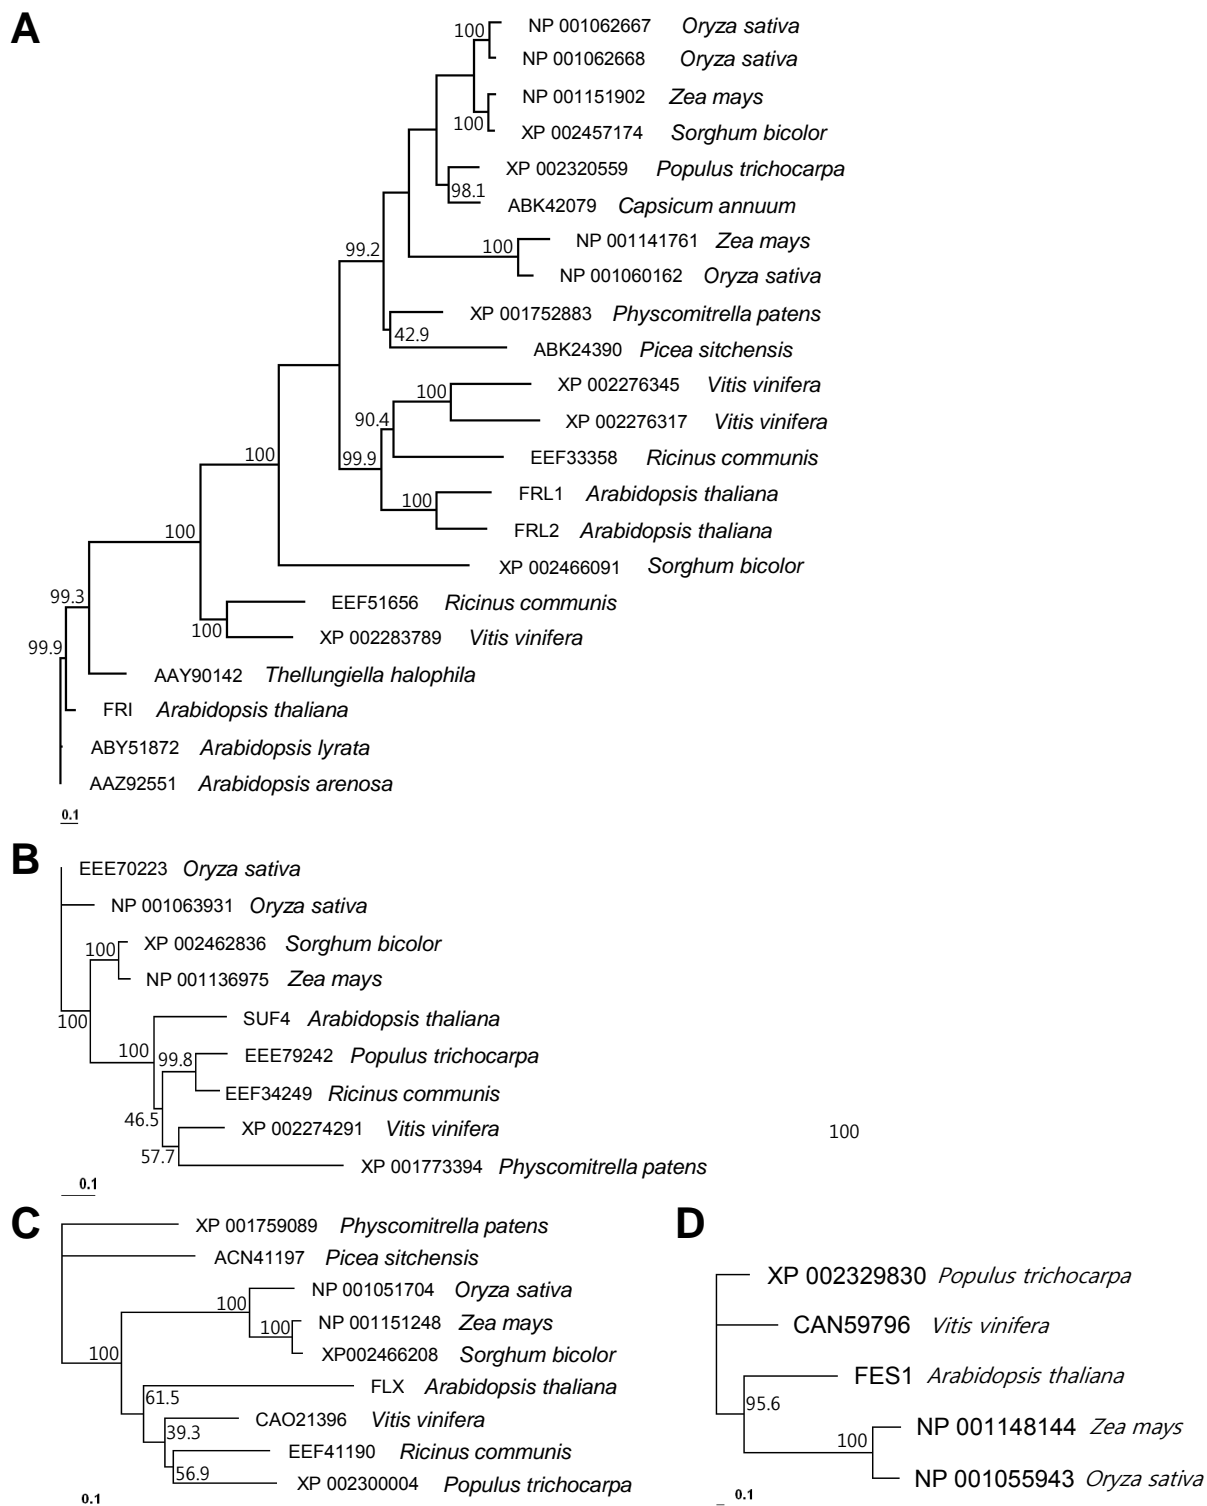

### Supplemental Figure 11. Phylogenetic trees of FRI-C components

Phylogenetic trees of FRI and FRL1 (A), SUF4 (B), FLX (C), and FES1 (D) homologs from different species including *Arabidopsis*, grape (*Vitis vinifera*), castorbean (*Ricinus communis*), rice (*Oryza sativa*), maize (*Zea mays*), sorghum (*Sorghum bicolor*), poplar (*Populus trichocarpa*), spruce (*Picea sitchensis*) and moss (*Physcomitrella patens*). The phylogenetic analysis was performed using the PHYLIP program. The bootstrap values from 1000 trials are shown and the scale bars for branch length are shown in lower panel.

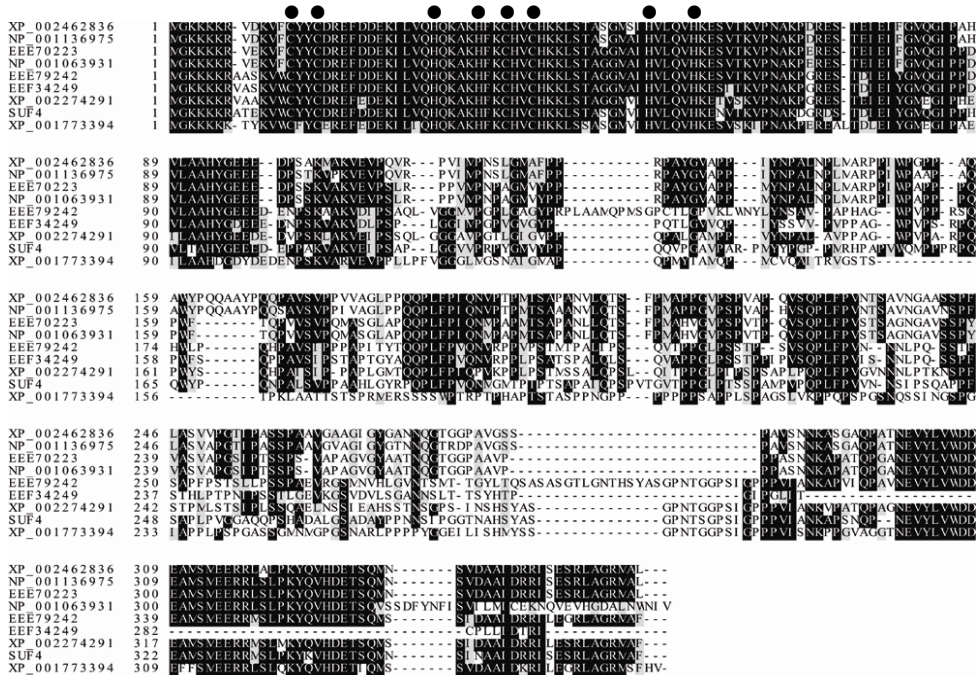

**Supplemental Figure 12. Alignment of SUF4 homologs from different plant species**

GenBank accession numbers are as follows: NP\_111063931 and EEE70223 for rice (*Oryza sativa*), NP\_001136975 for maize (*Zea mays*), XP\_002462836 for sorghum (*Sorghum bicolor*), EEF34249 for castorbean (*Ricinus communis*), EEE79242 for poplar (*Populus trichocarpa*), XP\_002274291 for grape (*Vitis vinifera*), and XP\_001773394 for moss (*Physcomitrella patens*). Dots indicate the C2H2 type zinc finger motifs conserved between SUF4 homologs.

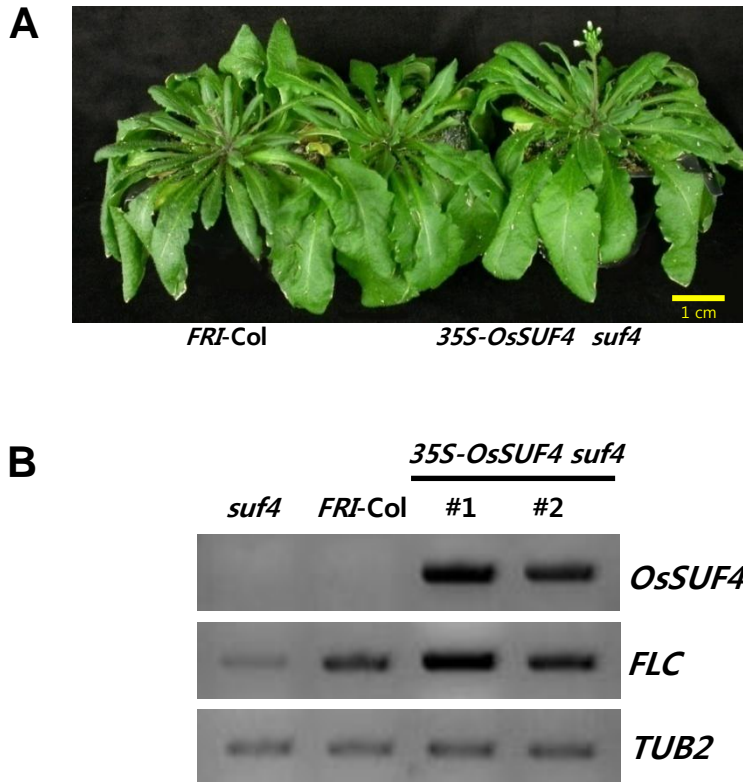

**Supplemental Figure 13. The over-expression of *OsSUF4* rescued *suf4* mutant phenotype**

(A) Morphology of two 6-week-old *35S-OsSUF4 suf4* and *FRI-Col* plants.

(B) RT-PCR analysis of the expression of *OsSUF4* and *FLC* in *suf4*, wild type (*FRI-Col*) and *35S-OsSUF4* plants. The *b-tubulin 2* gene (*TUB2*) was amplified as a quantitative control.

**Supplemental Table 1.** These tables contain all of the LC-MS/MS results for the myc-FRI IP and the control sample. The FRI associated proteins reported in the text are shown in green colored boxes. These data were processed by SEQUEST program.

(A) Identified protein and their peptide sequence list with myc-FRI IP

|    | Gene                                               | Peptide Sequence            | Score  | Accession | Peptides (Hits) |
|----|----------------------------------------------------|-----------------------------|--------|-----------|-----------------|
| #1 | RBL_ARATH RecName: Full=Ribulose biphosphate carbo | K.SQAETGEIK.G               | 520.28 | 3914541.0 | 52 (52 0 0 0 0) |
|    |                                                    | R.LSGGDHIHAGTVVGK.L         |        |           |                 |
|    |                                                    | R.LSGGDHIHAGTVVGK.L         |        |           |                 |
|    |                                                    | K.LGLSAKNYGR.A              |        |           |                 |
|    |                                                    | K.TFQGPPHGIQVER.D           |        |           |                 |
|    |                                                    | R.VALEACVQAR.N              |        |           |                 |
|    |                                                    | R.LSGGDHIHAGTVVGKLEGDR.E    |        |           |                 |
|    |                                                    | R.LSGGDHIHAGTVVGKLEGDR.E    |        |           |                 |
|    |                                                    | K.LTYYPPEYETK.D             |        |           |                 |
|    |                                                    | R.DNGLLLHIHR.A              |        |           |                 |
|    |                                                    | R.NEGRDLAVEGNEIIR.E         |        |           |                 |
|    |                                                    | K.LTYYPPEYETK.D             |        |           |                 |
|    |                                                    | K.LTYYPPEYETK.D             |        |           |                 |
|    |                                                    | R.NEGRDLAVEGNEIIR.E         |        |           |                 |
|    |                                                    | R.NEGRDLAVEGNEIIR.E         |        |           |                 |
|    |                                                    | R.NEGRDLAVEGNEIIR.E         |        |           |                 |
|    |                                                    | R.LEDLRIPPAYTK.T            |        |           |                 |
|    |                                                    | R.LEDLRIPPAYTK.T            |        |           |                 |
|    |                                                    | R.LEDLRIPPAYTK.T            |        |           |                 |
|    |                                                    | R.DLAVEGNEIIR.E             |        |           |                 |
|    |                                                    | R.DLAVEGNEIIR.E             |        |           |                 |
|    |                                                    | R.LEDLRIPPAYTK.T            |        |           |                 |
|    |                                                    | R.DLAVEGNEIIR.E             |        |           |                 |
|    |                                                    | R.DLAVEGNEIIR.E             |        |           |                 |
|    |                                                    | R.VALEACVQAR.N              |        |           |                 |
|    |                                                    | R.GGLDFTKDDENVNSQPFMR.W     |        |           |                 |
|    |                                                    | R.GGLDFTKDDENVNSQPFMR.W     |        |           |                 |
|    |                                                    | R.GGLDFTKDDENVNSQPFMR.W     |        |           |                 |
|    |                                                    | K.DTDILAAFR.V               |        |           |                 |
|    |                                                    | K.LEGDRESTLGFVDLLR.D        |        |           |                 |
|    |                                                    | K.LTYYPPEYETKDTDILAAFR.V    |        |           |                 |
|    |                                                    | K.LTYYPPEYETKDTDILAAFR.V    |        |           |                 |
|    |                                                    | K.EYKLTYYTPEYETKDTDILAAFR.V |        |           |                 |

|    |                                                     |                                                                                                                                                                                                                                                                                                                                                                                                                                                                                                                                                                                                                                                                                                                                     |        |            |               |
|----|-----------------------------------------------------|-------------------------------------------------------------------------------------------------------------------------------------------------------------------------------------------------------------------------------------------------------------------------------------------------------------------------------------------------------------------------------------------------------------------------------------------------------------------------------------------------------------------------------------------------------------------------------------------------------------------------------------------------------------------------------------------------------------------------------------|--------|------------|---------------|
|    |                                                     | K.EYKLTYYTPEYETKDTDILAAFR.V<br>R.ESTLGFVDLLRDDYVEKDR.S<br>K.LEGDRESTLGFVDLLRDDYVEK.D<br>K.EITFNFPPTIDKLDGQE.-<br>K.EITFNFPPTIDKLDGQE.-                                                                                                                                                                                                                                                                                                                                                                                                                                                                                                                                                                                              |        |            |               |
| #2 | RCA_ARATH RecName: Full=Ribulose biphosphate carb   | R.GLAYDTSDDQQDITR.G<br>R.GLAYDTSDDQQDITR.G<br>R.GLAYDTSDDQQDITR.G<br>R.GLAYDTSDDQQDITR.G<br>R.EGPPVFEQPEMTYEK.L<br>R.EGPPVFEQPEMTYEK.L<br>R.EGPPVFEQPEMTYEK.L<br>R.EGPPVFEQPEMTYEK.L<br>K.LMEYGNMLVMEQENVKR.V<br>K.LMEYGNMLVMEQENVKR.V<br>R.VQLAETYSQAALGDANADAIGR.G<br>R.VQLAETYSQAALGDANADAIGR.G<br>K.RVQLAETYSQAALGDANADAIGR.G<br>R.VQLAETYSQAALGDANADAIGR.G<br>R.VQLAETYSQAALGDANADAIGR.G<br>R.VQLAETYSQAALGDANADAIGR.G<br>R.VQLAETYSQAALGDANADAIGR.G<br>R.VQLAETYSQAALGDANADAIGR.G<br>K.MGINPIMMSAGELESGNAGEPAK.L<br>R.VYDDEVKRFVESLGVEK.I<br>K.MGINPIMMSAGELESGNAGEPAK.L<br>R.VYDDEVKRFVESLGVEK.I<br>R.VYDDEVKRFVESLGVEK.I<br>R.TDKIKDEDIVLVDQFPGQSIDFFGALR.A<br>K.IKDEDIVLVDQFPGQSIDFFGALR.A<br>K.IKDEDIVLVDQFPGQSIDFFGALR.A | 250.35 | 12643259.0 | 25 (25 0 0 0) |
| #3 | ATPB_ARATH RecName: Full=ATP synthase subunit beta, | R.IVGEEHYETAQQVK.Q<br>R.IVGEEHYETAQQVK.Q<br>K.ESGVINEQNLAESK.V<br>K.ESGVINEQNLAESK.V<br>K.VALVYQMNPPGAR.M<br>K.VALVYQMNPPGAR.M<br>K.VALVYQMNPPGAR.M<br>K.VALVYQMNPPGAR.M<br>R.FVQAGSEVSALLGR.M<br>R.FVQAGSEVSALLGR.M<br>R.FVQAGSEVSALLGR.M<br>R.IFNVLGEPVDNLGPVDTR.T<br>R.GMDVDMGNPLSVPVGGATLGR.I<br>R.GMDVDMGNPLSVPVGGATLGR.I<br>K.GIYPAVDPLDSTSTMLQPR.I<br>R.IFNVLGEPVDNLGPVDTR.T<br>R.IFNVLGEPVDNLGPVDTR.T<br>R.IFNVLGEPVDNLGPVDTR.T<br>R.IFNVLGEPVDNLGPVDTR.T<br>R.GMDVDMGNPLSVPVGGATLGR.I<br>R.GMDVDMGNPLSVPVGGATLGR.I                                                                                                                                                                                                         | 220.34 | 6686269.0  | 22 (22 0 0 0) |

|    |                                                    |                                                                                                                                                                                                                                                                                                                                                                             |        |            |                 |
|----|----------------------------------------------------|-----------------------------------------------------------------------------------------------------------------------------------------------------------------------------------------------------------------------------------------------------------------------------------------------------------------------------------------------------------------------------|--------|------------|-----------------|
|    |                                                    | K.TVLIMELINNIK.A                                                                                                                                                                                                                                                                                                                                                            |        |            |                 |
| #4 | CATA3_ARATH RecName: Full=Catalase-3               | R.IFAYGDTQR.H<br>R.IFAYGDTQR.H<br>R.APGVQTPVIVR.F<br>R.APGVQTPVIVR.F<br>R.APGVQTPVIVR.F<br>R.APGVQTPVIVR.F<br>R.WVEILSEPR.L<br>K.DLHDAIASGNYPEWK.L<br>K.DLHDAIASGNYPEWK.L<br>R.WVEILSEPR.L<br>R.WVEILSEPR.L<br>R.EGNFDLVGNNTPVFFIR.D<br>R.EGNFDLVGNNTPVFFIR.D<br>K.LFIQTMDPADEDKFDFPLDVTK.I                                                                                 | 140.31 | 21903384.0 | 14 (14 0 0 0 0) |
| #5 | PGKH_ARATH RecName: Full=Phosphoglycerate kinase,  | K.GVTTIIGGDSVAAVEK.V<br>K.GVTTIIGGDSVAAVEK.V<br>K.KLASLADLYVNDAFGTAHR.A<br>K.AKGVSLLLPTDVVADKFAPDANSK.I<br>K.KLASLADLYVNDAFGTAHR.A<br>K.AKGVSLLLPTDVVADKFAPDANSK.I<br>K.KLASLADLYVNDAFGTAHR.A<br>K.LASLADLYVNDAFGTAHR.A<br>K.AKGVSLLLPTDVVADKFAPDANSK.I<br>K.LASLADLYVNDAFGTAHR.A<br>K.AKGVSLLLPTDVVADKFAPDANSK.I<br>K.IVPASGIEDGWMGLDIGPSIK.T<br>K.IVPASGIEDGWMGLDIGPSIK.T | 130.29 | 12644295.0 | 13 (13 0 0 0 0) |
| #6 | FRIGI_ARATH RecName: Full=Protein FRIGIDA          | K.EMEEK.A<br>R.LMTEGGLAAAEK.M<br>R.LMTEGGLAAAEK.M<br>K.DTLQLDK.E<br>K.LMEEIPSALK.L<br>K.YIYANISDQAK.L<br>R.QFDDLQKHIESIENAIK.L<br>K.GLRKYIYANISDQAK.L<br>K.FVLDICIGFYQGR.R<br>K.ELPGWQIKEQIVSLEK.D<br>K.RSQFLVPMVSGIVESSIKR.G<br>K.EMEEKARSLMEEAALAK.R                                                                                                                      | 120.09 | 17432946.0 | 12 (12 0 0 0 0) |
| #7 | GDL19_ARATH RecName: Full=GDSL esterase/lipase At1 | R.ELVVYPADEPMR.E<br>K.IGPMLNELAR.T<br>K.IGPMLNELAR.T<br>K.SRDDPNGKFSGLIAPDFLAK.F<br>K.TLLPQTFWPYK.S<br>K.TLLPQTFWPYK.S<br>R.GASFAVADATLLGAPVESLTLNQQVR.K<br>R.GASFAVADATLLGAPVESLTLNQQVR.K<br>R.GASFAVADATLLGAPVESLTLNQQVR.K                                                                                                                                                | 110.29 | 75162477.0 | 11 (11 0 0 0 0) |



|     |                                                     |                                                                                                                                                                                                                                    |       |            |               |
|-----|-----------------------------------------------------|------------------------------------------------------------------------------------------------------------------------------------------------------------------------------------------------------------------------------------|-------|------------|---------------|
|     |                                                     | R.TAPASAPFQFTVDFYNAILTR.T<br>R.TAPASAPFQFTVDFYNAILTR.T                                                                                                                                                                             |       |            |               |
| #8  | TBB4_ARATH RecName: Full=Tubulin beta-4 chain; Alt  | R.RVSEQFTAMFRR.K<br>R.AVLMDLEPGTMDSLR.S<br>R.AVLMDLEPGTMDSLR.S<br>K.NSSYFVEWIPNNVK.S<br>K.NSSYFVEWIPNNVK.S<br>K.LAVNLIPFPR.L<br>R.SGPFQIFRPDNFVFGQSGAGNNWAK.G<br>R.SGPFQIFRPDNFVFGQSGAGNNWAK.G<br>K.GHYTEGAELIDSVLDVVRK.E          | 90.70 | 27735260.0 | 9 (9 0 0 0 0) |
| #9  | HSP83_ARATH RecName: Full=Heat shock protein 81-3;  | R.KPEEINKEEYAAFYK.S<br>R.KPEEINKEEYAAFYK.S<br>K.ADLVNNLGTIAR.S<br>K.ADLVNNLGTIAR.S<br>K.SGDELTSLKDYVTR.M<br>K.SGDELTSLKDYVTR.M<br>K.SGDELTSLKDYVTR.M<br>K.GIVDSEDPLNISR.E<br>K.GIVDSEDPLNISR.E                                     | 90.43 | 26454636.0 | 9 (9 0 0 0 0) |
| #10 | ACT1 (ACTIN 1); structural constituent of cyt       | R.AVFPSIVGRPR.H<br>R.AVFPSIVGRPR.H<br>R.AVFPSIVGRPR.H<br>R.AVFPSIVGRPR.H<br>K.EITALAPSSMK.I<br>R.VAPEEHPILLTEAPLNPK.A<br>R.VAPEEHPILLTEAPLNPK.A<br>R.VAPEEHPILLTEAPLNPK.A                                                          | 81.12 | 30687201.0 | 8 (8 0 0 0 0) |
| #11 | RUBA_ARATH RecName: Full=RuBisCO large subunit-bind | R.NVVLDEFGSPKVVNDGVTIAR.A<br>R.NVVLDEFGSPKVVNDGVTIAR.A<br>R.AIELPNAMENAGAALIR.E<br>R.AIELPNAMENAGAALIR.E<br>R.GIDKTQQGLIEELQK.K<br>R.GIDKTQQGLIEELQK.K<br>R.VLITDQKITAIKDIIPIEK.T<br>R.VLITDQKITAIKDIIPIEK.T                       | 80.32 | 2506276.0  | 8 (8 0 0 0 0) |
| #12 | BGL23_ARATH RecName: Full=Beta-glucosidase 23; Sho  | K.IGIAHSPAWFEAHDLADSQDGASIDR.A<br>K.IGIAHSPAWFEAHDLADSQDGASIDR.A<br>R.WMQDSLITWESK.N<br>R.WMQDSLITWESK.N<br>K.ASTDFVGLNYYTSVFSNHLEKPDPSKPR.W<br>R.SGYEAYLVTHNLLISHAEAVEAYR.K<br>R.IVKDFREYADFVFQEYGGK.V<br>R.IVKDFREYADFVFQEYGGK.V | 80.28 | 75313794.0 | 8 (8 0 0 0 0) |
| #13 | CATA2_ARATH RecName: Full=Catalase-2                | R.GPILLEDYHLVEK.L<br>R.GPILLEDYHLVEK.L<br>R.VGGTNHSHATQDLYDSIAAGNYPEWK.L                                                                                                                                                           | 80.26 | 17865693.0 | 8 (8 0 0 0 0) |

|     |                                                      |                                                                                                                                                                                                |       |             |               |
|-----|------------------------------------------------------|------------------------------------------------------------------------------------------------------------------------------------------------------------------------------------------------|-------|-------------|---------------|
|     |                                                      | K.TWPEDILPLQPVGR.M<br>K.LFIQIIDPADEKDFDPLDVTK.T<br>K.LFIQIIDPADEKDFDPLDVTK.T<br>R.EGNFDLVGNFPVFFIR.D<br>R.EGNFDLVGNFPVFFIR.D                                                                   |       |             |               |
| #14 | ATPA_ARATH RecName: Full=ATP synthase subunit alpha  | R.ELIIGDRQTGK.T<br>R.LIESPAPGIISR.R<br>R.EAYPGDVVFLHSR.L<br>K.ASSVAQVVTSLQER.G<br>K.TLTAEAESFLKEGIQEQLER.F<br>K.TLTAEAESFLKEGIQEQLER.F<br>K.TLTAEAESFLKEGIQEQLER.F<br>K.TLTAEAESFLKEGIQEQLER.F | 80.24 | 6685244.0   | 8 (8 0 0 0 0) |
| #15 | GAPA-2 (GLYCERALDEHYDE 3-PHOSPHATE DEHYDR            | R.AAALNIVPTSTGAAK.A<br>R.AAALNIVPTSTGAAK.A<br>R.AAALNIVPTSTGAAK.A<br>R.AAALNIVPTSTGAAK.A<br>R.VVDLADIVANNWK.-<br>R.VVDLADIVANNWK.-<br>R.VVDLADIVANNWK.-<br>R.VPTPNVSVVDLVVQVSK.K               | 80.22 | 186478427.0 | 8 (8 0 0 0 0) |
| #16 | RUBB_ARATH RecName: Full=RuBisCO large subunit-bin   | R.IVNDGVTVAR.E<br>R.IVNDGVTVAR.E<br>K.VVAAGANPVLITR.G<br>K.VVAAGANPVLITR.G<br>R.EVELEDPVENIGAK.L<br>R.IVNDGVTVAREVELEDPVENIGAK.L<br>R.IVNDGVTVAREVELEDPVENIGAK.L                               | 70.50 | 27735252.0  | 7 (7 0 0 0 0) |
| #17 | EFTU_ARATH RecName: Full=Elongation factor Tu, chlor | K.VGETVDLVGLRETR.S<br>K.VGETVDLVGLRETR.S<br>K.VGETVDLVGLR.E<br>K.VGETVDLVGLR.E<br>R.EGGKTVGAGVIGTILE.-<br>K.ILDEALAGDNVGLLLR.G<br>K.ILDEALAGDNVGLLLR.G                                         | 70.23 | 119194.0    | 7 (7 0 0 0 0) |
| #18 | FES1; nucleic acid binding / zinc ion binding        | K.SDEIDGEVR.S<br>K.SDEIDGEVR.S<br>K.SDEIDGEVR.S<br>R.EDISFMNPQR.V<br>R.EDISFMNPQR.V<br>K.EISSATAAENRVVLK.R                                                                                     | 60.94 | 30685865.0  | 6 (6 0 0 0 0) |
| #19 | HSP74_ARATH RecName: Full=Heat shock cognate 70 kD   | R.TTPSYVAFTDSER.L<br>K.NALENYAYNMR.N<br>K.NALENYAYNMR.N<br>K.NAVVTVPAYFNDSQR.Q<br>R.IINEPTAAAAYGLDK.K<br>R.IINEPTAAAAYGLDK.K                                                                   | 60.62 | 75311168.0  | 6 (6 0 0 0 0) |

|     |                                                     |                                                                                                                                           |       |             |               |
|-----|-----------------------------------------------------|-------------------------------------------------------------------------------------------------------------------------------------------|-------|-------------|---------------|
| #20 | ACT8_ARATH RecName: Full=Actin-8                    | K.AGFAGDDAPR.A<br>K.AGFAGDDAPR.A<br>R.AVFPSVVGRPR.H<br>R.IAPEEHPVLLTEAPLNPK.A<br>K.NYELPDGQVITIGAER.F<br>K.LSFVAVDYEQEMETSK.T             | 60.39 | 25452791.0  | 6 (6 0 0 0 0) |
| #21 | METE_ARATH RecName: Full=5-methyltetrahydropteroylt | K.NMVDAAK.L<br>R.SDEKLLSVFR.E<br>K.ALAGQKDEALFSANAAALASRR.S<br>K.ALAGQKDEALFSANAAALASRR.S<br>R.SDEKLLSVFR.E<br>K.KLNLPLPTTTIGSFPQTVELRR.V | 60.20 | 8134566.0   | 6 (6 0 0 0 0) |
| #22 | CATA1_ARATH RecName: Full=Catalase-1                | R.LGPNYLQLPVNAPK.C<br>R.LGPNYLQLPVNAPK.C<br>R.LGPNYLQLPVNAPK.C<br>K.IWPEDILPLQPVGR.L<br>K.IWPEDILPLQPVGR.L<br>K.IWPEDILPLQPVGR.L          | 58.20 | 21903389.0  | 6 (5 1 0 0 0) |
| #23 | GOX1_ARATH RecName: Full=Probable peroxisomal (S)-  | R.IAIQAGAAGIIVSNHGAR.Q<br>R.ESDIKNRFTLPPNLT.LK.N<br>R.ESDIKNRFTLPPNLT.LK.N<br>R.QLDYVPATISALEEVK.A<br>R.QLDYVPATISALEEVK.A                | 50.37 | 13124263.0  | 5 (5 0 0 0 0) |
| #24 | transketolase, putative [Arabidopsis thaliana]      | K.ALPTYTPESPGDATR.N<br>K.ALPTYTPESPGDATR.N<br>K.TPSILALSR.Q<br>K.VVPGFLGGSADLASSNMTLLK.A<br>K.KYPEEASELSIITGELPAGWEK.A                    | 50.30 | 18411711.0  | 5 (5 0 0 0 0) |
| #25 | GAS41; protein binding [Arabidopsis thaliana]       | R.QISLLEGQNQTVKTGSDL.-<br>K.SDEKQKK.L<br>K.SDEKQKK.L<br>K.WAVYVRGATNEDISVVVKK.V                                                           | 41.01 | 15242448.0  | 4 (4 0 0 0 0) |
| #26 | EFS (EARLY FLOWERING IN SHORT DAYS); histone        | K.LPER.E<br>K.LPER.E<br>K.SQEMSNEEINEELGIGQDEADAYDCDAK.R<br>K.TANSPINGNLTLEKK.L                                                           | 40.92 | 240254387.0 | 4 (4 0 0 0 0) |
| #27 | EF1A_ARATH RecName: Full=Elongation factor 1-alpha; | R.DMRQTVAVGVK.S<br>R.DMRQTVAVGVK.S<br>K.MTPTKPMVVETTFSEYPLGR.F<br>R.YDEIIEVSSYLK.V                                                        | 40.41 | 119143.0    | 4 (4 0 0 0 0) |
| #28 | IF4A3_ARATH RecName: Full=Eukaryotic initiation fa  | R.VLITTDLLAR.G<br>R.VLITTDLLAR.G<br>K.MFVLDEADEMLSR.G<br>K.MFVLDEADEMLSR.G                                                                | 40.38 | 75333652.0  | 4 (4 0 0 0 0) |

|     |                                                     |                                                                                            |       |             |               |
|-----|-----------------------------------------------------|--------------------------------------------------------------------------------------------|-------|-------------|---------------|
| #29 | VATA_ARATH RecName: Full=V-type proton ATPase catal | R.TTLVANTSMPVAAR.E<br>R.TTLVANTSMPVAAR.E<br>K.LAADTPLL TGQR.V<br>R.LAEMPADSGYPAYLAAR.L     | 40.25 | 3334404.0   | 4 (4 0 0 0 0) |
| #30 | ATPBO_ARATH RecName: Full=ATP synthase subunit bet  | K.VLNTGAPITVPVGR.A<br>K.VLNTGAPITVPVGR.A<br>K.VLNTGAPITVPVGR.A<br>R.DAPALVDLATGQEILATGIK.V | 40.23 | 75333362.0  | 4 (4 0 0 0 0) |
| #31 | GLNA2_ARATH RecName: Full=Glutamine synthetase, ch  | R.AKAAEIFSNKK.V<br>R.AKAAEIFSNKK.V<br>R.TIEKPVEDPSELPK.W<br>R.TIEKPVEDPSELPK.W             | 40.17 | 11386828.0  | 4 (4 0 0 0 0) |
| #32 | FRL1 (FRIGIDA LIKE 1) [Arabidopsis thaliana]        | R.VEELEKNKALR.K<br>R.IWDDETPLNQEVSAAIR.Y<br>K.LAYHWKSKVGVK.P<br>K.EVSALKPLIKIK.D           | 40.13 | 15237325.0  | 4 (4 0 0 0 0) |
| #33 | unnamed protein product [Arabidopsis thaliana]      | K.TAIAEGLAQR.I<br>K.LAEEGKLDPVVGRQPQIER.M<br>R.VLENLGADPSNIR.T<br>R.VLENLGADPSNIR.T        | 38.20 | 296529804.0 | 4 (3 1 0 0 0) |
| #34 | putative hsp 70 protein [Arabidopsis thaliana]      | R.KMNEVDEESKQVSYR.V<br>R.IINEPTAASLAYGFDR.K<br>R.IINEPTAASLAYGFDR.K                        | 30.51 | 25054945.0  | 3 (3 0 0 0 0) |
| #35 | jasmonate inducible protein isolog [Arabidopsis]    | K.SGFQISAPEATGK.Q<br>K.SGFQISAPEATGK.Q<br>K.VSVGQAQDGIGAVSFVYDK.A                          | 30.24 | 2062157.0   | 3 (3 0 0 0 0) |
| #36 | EF1G2_ARATH RecName: Full=Probable elongation fact  | K.MNPIGKVPVLETPEGPIFESNAIAR.Y<br>K.AKNPLDLLPPSPMLDDWKRL<br>K.AKNPLDLLPPSPMLDDWKRL          | 30.22 | 13626393.0  | 3 (3 0 0 0 0) |
| #37 | unnamed protein product [Arabidopsis thaliana]      | R.ADLNVPLDDNQITDDTR.I<br>R.LSELLGIEVTK.A<br>R.LSELLGIEVTK.A                                | 30.20 | 298541613.0 | 3 (3 0 0 0 0) |
| #38 | LOS1; copper ion binding / translation elonga       | R.RVIYASQITAKPR.L<br>K.AYLPVVESFGFSSQLR.A<br>K.AYLPVVESFGFSSQLR.A                          | 30.19 | 30696056.0  | 3 (3 0 0 0 0) |
| #39 | ATPAM_ARATH RecName: Full=ATP synthase subunit alp  | R.AAELTNLFESR.I<br>R.EVAFAQFGSDLDAATQALLNR.G<br>R.EVAFAQFGSDLDAATQALLNR.G                  | 30.19 | 14916970.0  | 3 (3 0 0 0 0) |
| #40 | GCST_ARATH RecName: Full=Aminomethyltransferase, m  | R.VGFFSSGPPAR.S<br>R.RAEGGFLGADVILQQLK.D<br>R.AEGGFLGADVILQQLKDGPTIR.R                     | 30.16 | 18206365.0  | 3 (3 0 0 0 0) |

|     |                                                      |                                                           |       |             |               |
|-----|------------------------------------------------------|-----------------------------------------------------------|-------|-------------|---------------|
| #41 | myb family transcription factor [Arabidopsis]        | K.YNKSVDILK.Y<br>K.DRYYSVNR.A<br>K.DRYYSVNR.A             | 30.11 | 30690620.0  | 3 (3 0 0 0 0) |
| #42 | SWC2; DNA binding / transcription factor [Ara        | K.KAIVHKAVYK.G<br>R.NLERVLAREEEVK.K<br>K.EEENAEQEDMEGEK.V | 30.10 | 79568513.0  | 3 (3 0 0 0 0) |
| #43 | FLX                                                  | K.PNSDR.A<br>R.MEAEARVIDGLGAELGQVR.S                      | 20.49 | 238479397.0 | 2 (2 0 0 0 0) |
| #44 | unnamed protein product [Arabidopsis thaliana]       | R.AKHYSLSLTSGGLGAYSDSR.G<br>R.AKHYSLSLTSGGLGAYSDSR.G      | 20.48 | 300649192.0 | 2 (2 0 0 0 0) |
| #45 | ALFC1_ARATH RecName: Full=Probable fructose-bispho   | K.MVDVLVEQNIVPGIKVDK.G<br>K.MVDVLVEQNIVPGIKVDK.G          | 20.41 | 75313518.0  | 2 (2 0 0 0 0) |
| #46 | transketolase, putative [Arabidopsis thaliana]       | R.FLAIDAVEKAK.S<br>R.FLAIDAVEKAK.S                        | 20.38 | 30689983.0  | 2 (2 0 0 0 0) |
| #47 | CAHC_ARATH RecName: Full=Carbonic anhydrase, chlor   | R.NIANMVPPFDKVK.Y<br>R.NIANMVPPFDKVK.Y                    | 20.38 | 38503395.0  | 2 (2 0 0 0 0) |
| #48 | PRS7A_ARATH RecName: Full=26S protease regulatory    | R.KVEFGLPDLESR.T<br>R.KVEFGLPDLESR.T                      | 20.38 | 28558169.0  | 2 (2 0 0 0 0) |
| #49 | G3PB_ARATH RecName: Full=Glyceraldehyde-3-phosphat   | R.VVDLAHLVASK.W<br>R.VPTPNVSVVDLVINVEK.K                  | 20.23 | 20455491.0  | 2 (2 0 0 0 0) |
| #50 | TBA1_ARATH RecName: Full=Tubulin alpha-1 chain       | R.QLFHPEQLISGKEDAANNFAR.G<br>R.QLFHPEQLISGKEDAANNFAR.G    | 20.21 | 135391.0    | 2 (2 0 0 0 0) |
| #51 | ATPG1_ARATH RecName: Full=ATP synthase gamma chain 1 | R.RPYIPVDKYLEAGTLPTAK.E<br>R.RPYIPVDKYLEAGTLPTAK.E        | 20.18 | 461550.0    | 2 (2 0 0 0 0) |
| #52 | DHE2_ARATH RecName: Full=Glutamate dehydrogenase 2   | K.FIVEAANHTDPDAEILSK.K<br>K.FIVEAANHTDPDAEILSK.K          | 20.18 | 12229806.0  | 2 (2 0 0 0 0) |
| #53 | At3g42170 [Arabidopsis thaliana]                     | R.AIAGEDPFVTGIK.T<br>R.AIAGEDPFVTGIK.T                    | 20.18 | 27808618.0  | 2 (2 0 0 0 0) |
| #54 | METK3_ARATH RecName: Full=S-adenosylmethionine syn   | R.FVIGGPHGDAGLTGR.K<br>R.FVIGGPHGDAGLTGR.K                | 20.17 | 75313514.0  | 2 (2 0 0 0 0) |
| #55 | DHE1_ARATH RecName: Full=Glutamate dehydrogenase 1   | K.GGIRYHPEVDPDEVNLAQLMTWK.T<br>R.YHPEVDPDEVNLAQLMTWK.T    | 20.17 | 12229807.0  | 2 (2 0 0 0 0) |
| #56 | ESM1_ARATH RecName: Full=GDSL esterase/lipase ESM1   | K.IGPMLNEFAK.I<br>K.DLPQTYWPYK.S                          | 20.14 | 75273556.0  | 2 (2 0 0 0 0) |
| #57 | TBA6_ARATH RecName: Full=Tubulin alpha-6 chain       | R.AVFVDLEPTVIDEVR.T                                       | 20.14 | 267070.0    | 2 (2 0 0 0 0) |

|     |                                                      |                                                |       |             |               |
|-----|------------------------------------------------------|------------------------------------------------|-------|-------------|---------------|
|     |                                                      | R.AVFVDLEPTVIDEVR.T                            |       |             |               |
| #58 | TBB5_ARATH RecName: Full=Tubulin beta-5 chain; AitNa | R.AVLMMDLEPGTMD SIR.S<br>R.AVLMMDLEPGTMD SIR.S | 20.13 | 267077.0    | 2 (2 0 0 0 0) |
| #59 | MB31_ARATH RecName: Full=Myrosinase-binding protei   | K.LGVNVAPIAK.-<br>K.LGVNVAPIAK.-               | 20.13 | 12230212.0  | 2 (2 0 0 0 0) |
| #60 | C71BQ_ARATH RecName: Full=Cytochrome P450 71B26      | R.FNDSNIDAK.G<br>R.FNDSNIDAK.G                 | 16.45 | 13878380.0  | 2 (0 2 0 0 0) |
| #61 | AT5g11760/T22P22_150 [Arabidopsis thaliana]          | R.SQRTPEVQN PESR.D<br>R.SQRTPEVQN PESR.D       | 16.18 | 16974389.0  | 2 (0 2 0 0 0) |
| #62 | TAF14 (TBP-associated factor 14) [Arabidopsis        | K.LNPENAYGPIPK.S                               | 10.76 | 15227942.0  | 1 (1 0 0 0 0) |
| #63 | SUF4 (suppressor of FRIGIDA4); DNA binding /         | K.ENVTKVPNAKDGR.D                              | 10.73 | 18397747.0  | 1 (1 0 0 0 0) |
| #64 | P5CS2_ARATH RecName: Full=Delta-1-pyrroline-5-carbo  | R.GPVGVEGLLTTR.W                               | 10.48 | 1709535.0   | 1 (1 0 0 0 0) |
| #65 | Cip amino terminal domain-containing protein         | R.VLEILGADPSNIR.T                              | 10.42 | 15230702.0  | 1 (1 0 0 0 0) |
| #66 | METK4_ARATH RecName: Full=S-adenosylmethionine syn   | K.YLDEKTIHFLNPSGR.F                            | 10.34 | 75311602.0  | 1 (1 0 0 0 0) |
| #67 | hypothetical protein At5g54062 [Arabidopsis tha      | K.MFPLNPLFP LLLK.D<br>K.MFPLNPLFP LLLK.D       | 10.31 | 67906738.0  | 2 (0 0 1 1 0) |
| #68 | putative rab geranylgeranyl transferase [Arabid      | K.AFLHKVTSSESLSR.H                             | 10.30 | 21436465.0  | 1 (1 0 0 0 0) |
| #69 | BIP1_ARATH RecName: Full=Luminal-binding protein 1   | R.ITPSWVGFTD SER.L                             | 10.29 | 18206379.0  | 1 (1 0 0 0 0) |
| #70 | putative Poly-A Binding Protein [Arabidopsis th      | R.GSGFVAFSTPEEATR.A                            | 10.27 | 17978685.0  | 1 (1 0 0 0 0) |
| #71 | MFP1_ARATH RecName: Full=MAR-binding filament-like   | K.KLEEDLGSAGKEILR.M                            | 10.25 | 83304464.0  | 1 (1 0 0 0 0) |
| #72 | G3PA_ARATH RecName: Full=Glyceraldehyde-3-phosphat   | K.YDSTLGFADADVKPSETAISVDGK.I                   | 10.25 | 20455490.0  | 1 (1 0 0 0 0) |
| #73 | FTSH1_ARATH RecName: Full=Cell division protease f   | R.SYLENQMAVALGGR.V                             | 10.23 | 17865766.0  | 1 (1 0 0 0 0) |
| #74 | PP437_ARATH RecName: Full=Putative pentatricopepti   | R.NEMLRQGLIPNNK.T<br>R.NEMLRQGLIPNNK.T         | 10.22 | 75171023.0  | 2 (0 0 1 1 0) |
| #75 | CADH9_ARATH RecName: Full=Probable cinnamyl alcoh    | K.SGVLSPFHFSR.R                                | 10.19 | 148887169.0 | 1 (1 0 0 0 0) |
| #76 | PRS6B_ARATH RecName: Full=26S protease regulatory    | R.LAKENAPAIIFIDEVD AIATAR.F                    | 10.19 | 28558168.0  | 1 (1 0 0 0 0) |
| #77 | GDL18_ARATH RecName: Full=GDSL esterase/lipase At    | K.TLVAQGFWPY GK.S                              | 10.18 | 122178777.0 | 1 (1 0 0 0 0) |
| #78 | BGL24_ARATH RecName: Full=Beta-glucosidase 24; Sh    | R.YKEDIQLMK.N                                  | 10.18 | 269969442.0 | 1 (1 0 0 0 0) |
| #79 | AC012563_16 hydroxypyruvate reductase (HPR); 509     | R.VGLDVFEEEPFMKPLADTK.N                        | 10.17 | 12324078.0  | 1 (1 0 0 0 0) |
| #80 | ACCC_ARATH RecName: Full=Biotin carboxylase,         |                                                | 10.17 | 75317871.0  | 1 (1 0 0 0 0) |

|      |                                                     |                                     |       |             |               |
|------|-----------------------------------------------------|-------------------------------------|-------|-------------|---------------|
|      | chlor                                               | R.ALNDTIITGVPTTINYHK.L              |       |             |               |
| #81  | unknown protein [Arabidopsis thaliana]              | K.REMPAELLRASLR.H                   | 10.17 | 14334732.0  | 1 (1 0 0 0 0) |
| #82  | G3PC_ARATH RecName: Full=Glyceraldehyde-3-phosphat  | K.VINDRFGIVEGLMTTVHSITATQK.T        | 10.17 | 20455492.0  | 1 (1 0 0 0 0) |
| #83  | HSP73_ARATH RecName: Full=Heat shock cognate 70 kD  | R.FTDSSVQSDIKLWPFTLK.S              | 10.17 | 18206367.0  | 1 (1 0 0 0 0) |
| #84  | SAHH1_ARATH RecName: Full=Adenosylhomocysteinase 1; | K.TGQVPDPTSTDNPEFQIVLSIIKEGLQVDPK.K | 10.16 | 6174970.0   | 1 (1 0 0 0 0) |
| #85  | AL2B4_ARATH RecName: Full=Aldehyde dehydrogenase f  | R.TGEVIAHVAEGDAEDINR.A              | 10.16 | 75313899.0  | 1 (1 0 0 0 0) |
| #86  | F16P1_ARATH RecName: Full=Fructose-1,6-bisphosphat  | R.VLDIQPTEIHQR.V                    | 10.16 | 21431766.0  | 1 (1 0 0 0 0) |
| #87  | AT4G35090 [Arabidopsis thaliana]                    | K.LFIQIIDPTDEDKFDPLDVTK.T           | 10.16 | 222423086.0 | 1 (1 0 0 0 0) |
| #88  | RH36_ARATH RecName: Full=DEAD-box ATP-dependent RN  | K.FLVLDEADRVLVDFGQDEL.R.T           | 10.16 | 75336890.0  | 1 (1 0 0 0 0) |
| #89  | CAH2_ARATH RecName: Full=Carbonic anhydrase 2, chl  | K.LLIEKDDLKDVAALK.V                 | 10.16 | 21903379.0  | 1 (1 0 0 0 0) |
| #90  | ARGI2_ARATH RecName: Full=Probable arginase         | R.VLSDVDGIPVQEIR.E                  | 10.15 | 11131457.0  | 1 (1 0 0 0 0) |
| #91  | ribulose-bisphosphate carboxylase [Arabid           | R.AVYECLRGGLYFTKDDENVNSQPFR.W       | 10.15 | 238479213.0 | 1 (1 0 0 0 0) |
| #92  | NDUS1_ARATH RecName: Full=NADH-ubiquinone oxidored  | R.ALSEVSGVKLPYNSIEGVR.S             | 10.15 | 55977290.0  | 1 (1 0 0 0 0) |
| #93  | Y1934_ARATH RecName: Full=Uncharacterized protein   | K.DLATAFLNVLGNEK.A                  | 10.15 | 75313128.0  | 1 (1 0 0 0 0) |
| #94  | hypothetical protein [Arabidopsis thaliana]         | R.ELLIGDRQTGK.T                     | 10.15 | 20198280.0  | 1 (1 0 0 0 0) |
| #95  | unknown protein [Arabidopsis thaliana]              | K.IMLEAIEREFEAATK.G                 | 10.15 | 24899759.0  | 1 (1 0 0 0 0) |
| #96  | unnamed protein product [Arabidopsis thaliana]      | K.GVPLTQLNLASSVK.N                  | 10.14 | 300540337.0 | 1 (1 0 0 0 0) |
| #97  | DWA1_ARATH RecName: Full=WD repeat-containing prot  | K.GQDVMVAEPER.V                     | 10.14 | 75329665.0  | 1 (1 0 0 0 0) |
| #98  | beta-glucosidase 1 [Arabidopsis thaliana]           | R.YKEDIQXMK.D                       | 10.14 | 166715126.0 | 1 (1 0 0 0 0) |
| #99  | mRNA cleavage factor subunit-like protein [Arab     | K.HPHVLLLQYRNSIFK.L                 | 10.13 | 21554114.0  | 1 (1 0 0 0 0) |
| #100 | MPPB_ARATH RecName: Full=Probable mitochondrial-pr  | R.RIPTAELFAR.I                      | 10.13 | 85700445.0  | 1 (1 0 0 0 0) |
| #101 | BGL20_ARATH RecName: Full=Beta-glucosidase 20; Sho  | R.YKEDIKLMK.N                       | 10.13 | 75298266.0  | 1 (1 0 0 0 0) |
| #102 | unknown protein [Arabidopsis thaliana]              | R.SIAEEGVSQVVRK.G                   | 10.13 | 28973069.0  | 1 (1 0 0 0 0) |
| #103 | putative aldehyde oxidase [Arabidopsis thaliana]    | K.SVKSMVPVATACALAANK.L              | 10.13 | 2792304.0   | 1 (1 0 0 0 0) |
| #104 | DEAD/DEAH box helicase, putative [Arabido           | R.ILVATDLVGR.G                      | 10.13 | 238481240.0 | 1 (1 0 0 0 0) |
| #105 | GAPC2 (GLYCERALDEHYDE-3-PHOSPHATE DEHYDRO           | K.AGIALSDKFVK.L                     | 10.13 | 145323882.0 | 1 (1 0 0 0 0) |
| #106 | unknown protein [Arabidopsis thaliana]              |                                     | 10.07 | 145334569.0 | 1 (1 0 0 0 0) |

K.KQKLSVLDK.T

## (B) Identified protein and their peptide sequence list with control IP

|    | Reference                                          | Sequence                                                                                                                                                                                                                                                                                                                                                                                                                                                                                                                                                                                                                                                                                                                                                                                                                                                                        | Score  | Accession  | Peptides (Hits) |
|----|----------------------------------------------------|---------------------------------------------------------------------------------------------------------------------------------------------------------------------------------------------------------------------------------------------------------------------------------------------------------------------------------------------------------------------------------------------------------------------------------------------------------------------------------------------------------------------------------------------------------------------------------------------------------------------------------------------------------------------------------------------------------------------------------------------------------------------------------------------------------------------------------------------------------------------------------|--------|------------|-----------------|
| #1 | GDL19_ARATH RecName: Full=GDSL esterase/lipase At1 | K.AANWNDDFVKK.S<br>K.AANWNDDFVKK.S<br>K.NNPNADASTQQAFVTSVTNK.L<br>K.NNPNADASTQQAFVTSVTNK.L<br>K.QHNEKIGPMLNELAR.T<br>R.ELVVYPADEPMR.E<br>R.ELVVYPADEPMR.E<br>K.LKNDISLLYSSGASK.F<br>K.LKNDISLLYSSGASK.F<br>K.IGPMLNELAR.T<br>K.IGPMLNELAR.T<br>K.IGPMLNELAR.T<br>K.IGPMLNELAR.T<br>K.SRDDPNGKFSGLIAPDFLAK.F<br>K.SRDDPNGKFSGLIAPDFLAK.F<br>K.SRDDPNGKFSGLIAPDFLAK.F<br>K.SRDDPNGKFSGLIAPDFLAK.F<br>R.DDPNGKFSGLIAPDFLAK.F<br>R.DDPNGKFSGLIAPDFLAK.F<br>R.DDPNGKFSGLIAPDFLAK.F<br>R.DDPNGKFSGLIAPDFLAK.F<br>R.DDPNGKFSGLIAPDFLAK.F<br>K.SRDDPNGKFSGLIAPDFLAK.F<br>K.FSDGLIAPDFLAK.F<br>K.FSDGLIAPDFLAK.F<br>K.TLLPQTFWPGK.S<br>K.TLLPQTFWPGK.S<br>K.TLLPQTFWPGK.S<br>R.GASFAVADATLLGAPVESLTLNQQVRK.F<br>R.GASFAVADATLLGAPVESLTLNQQVRK.F<br>R.GASFAVADATLLGAPVESLTLNQQVRK.F<br>R.GASFAVADATLLGAPVESLTLNQQVR.K<br>R.GASFAVADATLLGAPVESLTLNQQVR.K<br>R.GASFAVADATLLGAPVESLTLNQQVR.K | 330.35 | 75162477.0 | 33 (33 0 0 0)   |
| #2 | jasmonate inducible protein isolog [Arabidopsis]   | K.DGQKIVGFHGR.A<br>K.DGQKIVGFHGR.A<br>K.VYVGGQDGVAAVK.F<br>K.LTAEGGETGAWDDGSHDDVKK.V<br>K.FGVHVAPITK.-<br>K.SGFQISAPEATGK.Q<br>K.SGFQISAPEATGK.Q<br>K.FEYKNGSQVFGDER.G<br>K.IYASYGGEGIQYVK.F<br>R.AGDLLHKFGVHVAPITK.-<br>R.KVSVGQAQDGIGAVSFVYDK.A<br>R.KVSVGQAQDGIGAVSFVYDK.A<br>K.LEGAGSEAGTLWDDGAFDGVVK.V<br>K.LEGAGSEAGTLWDDGAFDGVVK.V                                                                                                                                                                                                                                                                                                                                                                                                                                                                                                                                       | 284.31 | 2062157.0  | 29 (26 3 0 0)   |



|    |                                                    |                                                                                                                                                                                                                                                                                                                                                                                                                                                                                                                                                                  |        |            |                 |
|----|----------------------------------------------------|------------------------------------------------------------------------------------------------------------------------------------------------------------------------------------------------------------------------------------------------------------------------------------------------------------------------------------------------------------------------------------------------------------------------------------------------------------------------------------------------------------------------------------------------------------------|--------|------------|-----------------|
|    |                                                    | K.LEGAGSEAGTLWDDGAFDGVK.V<br>K.VSVGQAQDGIGAVSFVYDK.A<br>K.VSVGQAQDGIGAVSFVYDK.A<br>K.LEGAGSEAGTLWDDGAFDGVK.K<br>K.LEGAGSEAGTLWDDGAFDGVK.K<br>K.LEGAGSEAGTLWDDGAFDGVK.K<br>K.LEGAGSEAGTLWDDGAFDGVK.K<br>K.LEGAGSEAGTLWDDGAFDGVK.K<br>R.VSIPFGIGAGTAFEFKK.D<br>R.VSIPFGIGAGTAFEFKK.D<br>K.VSVGQAQDGIGAVSFVYDKAGQVVEGK.E<br>K.VSVGQAQDGIGAVSFVYDKAGQVVEGK.E<br>K.SLSTQEVITALFTTNKTSYGPYGTK.S<br>K.SLSTQEVITALFTTNKTSYGPYGTK.S<br>K.SAEFTLAPDEYITALSAYGK.S<br>K.SAEFTLAPDEYITALSAYGK.S                                                                               |        |            |                 |
| #3 | BGL23_ARATH RecName: Full=Beta-glucosidase 23; Sho | K.NLNTDAFR.M<br>K.NLNTDAFR.M<br>K.NLNTDAFR.M<br>K.NLNTDAFR.M<br>K.NLNTDAFR.M<br>K.DIVGHRLPKFTTEQK.A<br>R.SLLKYIK.D<br>R.MSIWPR.I<br>R.MSIWPR.I<br>R.MSIWPR.I<br>R.YKEDIQLMKNLNTDAFR.M<br>K.IGIAHSPAWEAHLADSQDGASIDR.A<br>R.YKEDIQLMKNLNTDAFR.M<br>K.IGIAHSPAWEAHLADSQDGASIDR.A<br>K.NAQNYAIGSKPLTAALNVYSR.G<br>K.NAQNYAIGSKPLTAALNVYSR.G<br>K.NAQNYAIGSKPLTAALNVYSR.G<br>K.NAQNYAIGSKPLTAALNVYSR.G<br>K.NAQNYAIGSKPLTAALNVYSR.G<br>R.WMQDSLITWESK.N<br>R.WMQDSLITWESK.N<br>R.FGLYYVDFK.N<br>K.ASTDFVGLNYYTSVFSNHLEKPDPSKPR.W<br>K.ASTDFVGLNYYTSVFSNHLEKPDPSKPR.W | 234.38 | 75313794.0 | 24 (23 0 0 1 0) |
| #4 | MB31_ARATH RecName: Full=Myrosinase-binding protei | K.ASKPVLGSDHGKK.T<br>K.ASKPVLGSDHGKK.T<br>R.GGEEWDDGGAYENVKK.V<br>K.LGVNVAPIAK.-<br>K.LEAQGGRRGGDWDGGAYDNVKK.V<br>K.LGVNVAPIAK.-<br>K.GKTSQPFGLTSGEEAELGGGK.I<br>K.TSQPFGLTSGEEAELGGGK.I<br>K.TSQPFGLTSGEEAELGGGK.I<br>K.IYVGQGDSCVTFK.A<br>K.IVGFYQQAGEYLYK.L                                                                                                                                                                                                                                                                                                   | 110.31 | 12230212.0 | 11 (11 0 0 0 0) |
| #5 | ESM1_ARATH RecName: Full=GDSL esterase/lipase      |                                                                                                                                                                                                                                                                                                                                                                                                                                                                                                                                                                  | 100.27 | 75273556.0 | 10 (10 0 0 0 0) |

|     |                                                    |                                                                                                                                                                                                                                                                 |       |             |               |
|-----|----------------------------------------------------|-----------------------------------------------------------------------------------------------------------------------------------------------------------------------------------------------------------------------------------------------------------------|-------|-------------|---------------|
|     | ESM1                                               | R.KDLPQTYWPTYGK.S<br>R.KDLPQTYWPTYGK.S<br>R.ELIVYPTGETMR.E<br>K.DLPQTYWPTYGK.S<br>K.DLPQTYWPTYGK.S<br>K.DLPQTYWPTYGK.S<br>K.DLPQTYWPTYGK.S<br>K.DLPQTYWPTYGK.S<br>K.AQEEMAHLLYGADPDVVQPMTVR.E<br>K.AQEEMAHLLYGADPDVVQPMTVR.E<br>R.GVSFAVADASILGAPVESMTLNQQVVK.F |       |             |               |
| #6  | CATA3_ARATH RecName: Full=Catalase-3               | R.LNVRPSI.-<br>R.LNVRPSI.-<br>R.LNVRPSI.-<br>R.LNVRPSI.-<br>R.LNVRPSI.-<br>R.APGVQTPVIVR.F<br>R.APGVQTPVIVR.F                                                                                                                                                   | 70.14 | 21903384.0  | 7 (7 0 0 0 0) |
| #7  | AC008051_11 Identical to gene ZW9 from Arabidopsi  | R.VIDQIQSNNFEK.K<br>R.VIDQIQSNNFEK.K<br>K.LRVIDQIQSNNFEKK.V<br>K.LRVIDQIQSNNFEKK.V<br>R.FLDSYTSDFS SSGGR.N                                                                                                                                                      | 50.46 | 8979946.0   | 5 (5 0 0 0 0) |
| #8  | GDL18_ARATH RecName: Full=GDSL esterase/lipase At  | K.IGPMLNEMAR.N<br>K.TLVAQGFWPYGK.S<br>K.TLVAQGFWPYGK.S<br>K.TLVAQGFWPYGK.S<br>K.SRDDPNGKFS DGLITPDFLAK.F                                                                                                                                                        | 48.24 | 122178777.0 | 5 (4 1 0 0 0) |
| #9  | unknown protein [Arabidopsis thaliana]             | R.YNYDHDSL GELKFLARR.G<br>R.YNYDHDSL GELKFLARR.G<br>R.YNYDHDSL GELKFLARR.G<br>R.YNYDHDSL GELKFLARR.G                                                                                                                                                            | 40.16 | 240254445.0 | 4 (4 0 0 0 0) |
| #10 | BGL18_ARATH RecName: Full=Beta-glucosidase 18; Sh  | K.DLNTDAFR.L<br>K.DLNTDAFR.L<br>R.YKEDIQLMKDLNTDAFR.L<br>R.YKEDIQLMKDLNTDAFR.L                                                                                                                                                                                  | 32.21 | 166897681.0 | 4 (0 4 0 0 0) |
| #11 | BGL20_ARATH RecName: Full=Beta-glucosidase 20; Sho | R.YKEDIKLMK.N<br>R.YKEDIKLMK.N<br>R.FSIAWPR.J                                                                                                                                                                                                                   | 30.18 | 75298266.0  | 3 (3 0 0 0 0) |
| #12 | BGL24_ARATH RecName: Full=Beta-glucosidase 24; Sh  | K.DIVGHR LPK.F<br>R.YKEDIQLMK.N<br>R.YKEDIQLMK.N                                                                                                                                                                                                                | 30.14 | 269969442.0 | 3 (3 0 0 0 0) |
| #13 | RH48_ARATH RecName: Full=Probable DEAD-box ATP-dep | R.SGSITGSLWNRIS SR.N<br>R.SGSITGSLWNRIS SR.N<br>R.SGSITGSLWNRIS SR.N                                                                                                                                                                                            | 30.11 | 75333533.0  | 3 (3 0 0 0 0) |
| #14 | RCA_ARATH RecName: Full=Ribulose biphosphate       |                                                                                                                                                                                                                                                                 | 20.42 | 12643259.0  | 2 (2 0 0 0 0) |

|     |                                                      |                                                                                  |       |             |               |
|-----|------------------------------------------------------|----------------------------------------------------------------------------------|-------|-------------|---------------|
|     | carb                                                 | R.GLAYDTSDDQQDITR.G<br>R.GLAYDTSDDQQDITR.G                                       |       |             |               |
| #15 | binding / calmodulin binding [Arabidopsis th         | R.GQIVRSRLQGASTLYSK.L<br>R.GQIVRSRLQGASTLYSK.L                                   | 20.29 | 240256033.0 | 2 (2 0 0 0 0) |
| #16 | BGL22_ARATH RecName: Full=Beta-glucosidase 22; Sho   | K.NVDHSAIGSQPLTAALPVYAK.G<br>K.NVDHSAIGSQPLTAALPVYAK.G                           | 20.17 | 75308894.0  | 2 (2 0 0 0 0) |
| #17 | RBL_ARATH RecName: Full=Ribulose bisphosphate carbo  | R.DLAVEGNEIIR.E<br>K.DTDILAAFR.V                                                 | 20.16 | 3914541.0   | 2 (2 0 0 0 0) |
| #18 | beta-glucosidase 1 [Arabidopsis thaliana]            | R.YKEDIQXMK.D<br>R.YKEDIQXMK.D                                                   | 20.14 | 166715126.0 | 2 (2 0 0 0 0) |
| #19 | At2g19385 [Arabidopsis thaliana]                     | K.GQSKSANGTPAK.P<br>K.AEELKVNLSR.F                                               | 20.13 | 87116626.0  | 2 (2 0 0 0 0) |
| #20 | EF1A_ARATH RecName: Full=Elongation factor 1-alpha;  | K.IGGIGTVPVGR.V<br>K.IGGIGTVPVGR.V                                               | 20.13 | 119143.0    | 2 (2 0 0 0 0) |
| #21 | DIN9 (DARK INDUCIBLE 9); mannose-6-phosphate         | R.GKSTVFPVPGPSVYLVIEGKGQLR.T<br>R.GKSTVFPVPGPSVYLVIEGKGQLR.T                     | 20.13 | 15219821.0  | 2 (2 0 0 0 0) |
| #22 | AC026237_3 Similar to protein kinases [Arabidopsi    | K.GTRNGSVAIAIDK.D<br>K.GTRNGSVAIAIDK.D                                           | 20.12 | 9954729.0   | 2 (2 0 0 0 0) |
| #23 | unknown protein [Arabidopsis thaliana]               | K.MTVNDVVLGVSQAGLSQYLDR.R<br>K.MTVNDVVLGVSQAGLSQYLDR.R                           | 20.11 | 15229104.0  | 2 (2 0 0 0 0) |
| #24 | AC010795_8 RNA polymerase IIA largest subunit, p     | K.KLVGFEGNTLELSSR.V<br>K.KLVGFEGNTLELSSR.V                                       | 18.22 | 12323252.0  | 2 (1 1 0 0 0) |
| #25 | putative protein [Arabidopsis thaliana]              | K.PHSDNNLVELGDVAEKDDDK.A<br>K.PHSDNNLVELGDVAEKDDDK.A<br>K.PHSDNNLVELGDVAEKDDDK.A | 18.21 | 22531002.0  | 3 (0 1 1 1 0) |
| #26 | FBK37_ARATH RecName: Full=Putative F-box/kelch-rep   | R.AVAEVINGKIYVIGGCEK.R<br>R.AVAEVINGKIYVIGGCEK.R                                 | 18.18 | 75100655.0  | 2 (1 1 0 0 0) |
| #27 | hypothetical protein At2g20805 [Arabidopsis tha      | R.KYENNLVKAK.N<br>R.KYENNLVKAK.N                                                 | 18.13 | 91805453.0  | 2 (1 1 0 0 0) |
| #28 | unknown protein [Arabidopsis thaliana]               | K.QFVDLLTEELKLEVADEHSR.H<br>K.QFVDLLTEELKLEVADEHSR.H                             | 16.63 | 21281115.0  | 2 (0 2 0 0 0) |
| #29 | UDP-glucose 6-dehydrogenase, putative [Arabid        | K.KLDFQRIFENMQK.P<br>K.KLDFQRIFENMQK.P                                           | 16.56 | 15242316.0  | 2 (0 2 0 0 0) |
| #30 | AGL5_ARATH RecName: Full=Agamous-like MADS-box prote | -.MEGGASNEVAESSK.I<br>-.MEGGASNEVAESSK.I                                         | 16.54 | 113515.0    | 2 (0 2 0 0 0) |
| #31 | 4325351 T25H8.2 TNP2 pr                              | K.QNIVLIICNFEK.I                                                                 | 16.49 | 6272381.0   | 2 (0 2 0 0 0) |

|     |                                                    |                                                              |       |             |               |
|-----|----------------------------------------------------|--------------------------------------------------------------|-------|-------------|---------------|
|     |                                                    | K.QNIVLIICNFEK.I                                             |       |             |               |
| #32 | PUB50_ARATH RecName: Full=Putative U-box domain-co | R.KYEDQKIDK.L<br>R.KYEDQKIDK.L                               | 16.39 | 75333799.0  | 2 (0 2 0 0 0) |
| #33 | CPSF1_ARATH RecName: Full=Cleavage and polyadenyl  | K.RGGVMDGVYGVSLVCHYR.L<br>K.RGGVMDGVYGVSLVCHYR.L             | 16.38 | 290457637.0 | 2 (0 2 0 0 0) |
| #34 | ALA8_ARATH RecName: Full=Putative phospholipid-tra | R.WYLRPDHTTVFYDPRR.A<br>R.WYLRPDHTTVFYDPRR.A                 | 16.28 | 12229655.0  | 2 (0 2 0 0 0) |
| #35 | RH33_ARATH RecName: Full=Putative DEAD-box ATP-dep | K.KQSVDNVMEEK.Q<br>K.KQSVDNVMEEK.Q                           | 16.25 | 75318697.0  | 2 (0 2 0 0 0) |
| #36 | AC012680_8 putative mitochondrial carrier protei   | K.QLLKIAGNQEATNFER.F<br>K.QLLKIAGNQEATNFER.F                 | 16.15 | 12324250.0  | 2 (0 2 0 0 0) |
| #37 | putative protein kinase [Arabidopsis thaliana]     | R.ENLVAREVLLVK.T<br>R.ENLVAREVLLVK.T                         | 16.12 | 3980410.0   | 2 (0 2 0 0 0) |
| #38 | FK125_ARATH RecName: Full=F-box/kelch-repeat prot  | R.PKLRIDPSLTLIPGLSNDVGR.L<br>R.PKLRIDPSLTLIPGLSNDVGR.L       | 16.11 | 122223580.0 | 2 (1 0 1 0 0) |
| #39 | BIM1; DNA binding / protein binding / tra          | R.DKASFLLEVIEYIQLQEKADK.Y<br>R.DKASFLLEVIEYIQLQEKADK.Y       | 14.67 | 238481217.0 | 2 (0 1 1 0 0) |
| #40 | glycosyl hydrolase family 10 protein [Arabido      | K.LGFPFGCEVEKNILGNK.A<br>K.LGFPFGCEVEKNILGNK.A               | 14.57 | 42567365.0  | 2 (0 1 1 0 0) |
| #41 | AC011661_23 T23J18.16 [Arabidopsis thaliana]       | R.TTVELICNTGYSHKLGK.M<br>R.TTVELICNTGYSHKLGK.M               | 14.54 | 6554199.0   | 2 (0 1 1 0 0) |
| #42 | PP334_ARATH RecName: Full=Pentatricopeptide repeat | K.AEAMLEDLAR.R<br>K.AEAMLEDLAR.R                             | 14.13 | 75146702.0  | 2 (0 1 1 0 0) |
| #43 | NAD+ dependent isocitrate dehydrogenase subunit    | K.CRTKDLGGTSTTQEVDAGIAK.L<br>K.CRTKDLGGTSTTQEVDAGIAK.L       | 12.71 | 1766046.0   | 2 (0 0 2 0 0) |
| #44 | galactinol synthase, putative [Arabidopsis th      | -.MAPTEMNIERKVEADVAVIPNDGK.R<br>-.MAPTEMNIERKVEADVAVIPNDGK.R | 12.69 | 30692339.0  | 2 (0 1 0 1 0) |
| #45 | Unknown protein [Arabidopsis thaliana]             | K.SVNWHTPFPEARLEKALNNIDK.-<br>K.SVNWHTPFPEARLEKALNNIDK.-     | 12.65 | 4204286.0   | 2 (0 0 2 0 0) |
| #46 | downy mildew resistance protein RPP5 [Arabidopsi   | R.NEIVVEDCFWNK.N<br>R.NEIVVEDCFWNK.N                         | 12.59 | 6449046.0   | 2 (0 0 2 0 0) |
| #47 | ANP1_ARATH RecName: Full=Mitogen-activated protein | K.PSFSPPPANTVDMAPPISWR.K<br>K.PSFSPPPANTVDMAPPISWR.K         | 12.14 | 46576858.0  | 2 (0 1 0 1 0) |
| #48 | ATP binding / protein binding / transmembran       | R.FLWDPTTEIHYVLDSTGTR.R<br>R.FLWDPTTEIHYVLDSTGTR.R           | 12.12 | 145337463.0 | 2 (0 0 2 0 0) |
| #49 | CADH6_ARATH RecName: Full=Probable cinnamyl        |                                                              | 10.62 | 75318586.0  | 2 (0 0 1 1 0) |

|     |                                                      |                                                |       |             |               |
|-----|------------------------------------------------------|------------------------------------------------|-------|-------------|---------------|
|     | alcohol                                              | K.AFGTKVTVVSSTTGKSK.D<br>K.AFGTKVTVVSSTTGKSK.D |       |             |               |
| #50 | AF339713_1 unknown protein [Arabidopsis thaliana]    | K.ALLGEGATVVLEGQKVLVPR.A                       | 10.41 | 12642906.0  | 1 (1 0 0 0 0) |
| #51 | RQL5_ARATH RecName: Full=ATP-dependent DNA helica    | K.SDGVDFVPEPLVEVIAPPK.S                        | 10.38 | 298289257.0 | 1 (1 0 0 0 0) |
| #52 | zinc finger protein-related [Arabidopsis thal        | R.YNILLAQPPRASVPLVAAAR.D                       | 10.36 | 30697493.0  | 1 (1 0 0 0 0) |
| #53 | At3g29035 [Arabidopsis thaliana]                     | K.FAIDNLSKTAK.N                                | 10.33 | 30984532.0  | 1 (1 0 0 0 0) |
| #54 | P2A01_ARATH RecName: Full=Protein PHLOEM PROTEIN 2   | K.MFRNQDSKYLIPVQK.E                            | 10.31 | 75100453.0  | 1 (1 0 0 0 0) |
| #55 | At1g19690 [Arabidopsis thaliana]                     | -.MAVFQLPSLSPEIPFR.F                           | 10.31 | 109946403.0 | 1 (1 0 0 0 0) |
| #56 | CATA1_ARATH RecName: Full=Catalase-1                 | R.LGPNYLQLPVNAPK.C                             | 10.31 | 21903389.0  | 1 (1 0 0 0 0) |
| #57 | TBB4_ARATH RecName: Full=Tubulin beta-4 chain; Alt   | R.SGPFQIFRPDNFVFGQSGAGNNWAK.G                  | 10.30 | 27735260.0  | 1 (1 0 0 0 0) |
| #58 | FER4_ARATH RecName: Full=Probable ferredoxin-4, ch   | R.ISPSQAQLTTR.L                                | 10.29 | 75309110.0  | 1 (1 0 0 0 0) |
| #59 | catalytic/ transferase [Arabidopsis thaliana]        | R.ACSFLSNSYILEEGK.V                            | 10.29 | 240256302.0 | 1 (1 0 0 0 0) |
| #60 | serine/threonine protein kinase, putative [Ar        | K.FGDEISREDK.E                                 | 10.29 | 15240865.0  | 1 (1 0 0 0 0) |
| #61 | unknown protein [Arabidopsis thaliana]               | R.VFLLQDIIR.V                                  | 10.27 | 30793793.0  | 1 (1 0 0 0 0) |
| #62 | SCL26_ARATH RecName: Full=Scarecrow-like protein 2   | R.FSHQTPSSVISFLSEAK.T                          | 10.26 | 75208411.0  | 1 (1 0 0 0 0) |
| #63 | suppressor of ABI3-5 [Arabidopsis thaliana]          | R.TLLHKKALAR.F                                 | 10.23 | 293339650.0 | 1 (1 0 0 0 0) |
| #64 | AC068602_19 F14D16.28 [Arabidopsis thaliana]         | K.LMGLLRSFDFGTCLSLLRK.S                        | 10.22 | 8778287.0   | 1 (1 0 0 0 0) |
| #65 | PROL_ARATH RecName: Full=Protein PROLIFERA           | K.GFLENFADANGRSK.Y                             | 10.22 | 20141757.0  | 1 (1 0 0 0 0) |
| #66 | antiporter/ drug transporter/ transporter [A         | K.LRECVGCVSEETSK.A                             | 10.20 | 186512202.0 | 1 (1 0 0 0 0) |
| #67 | CX32_ARATH RecName: Full=Probable serine/threonine   | -.MGACISFFSSSSPSK.T                            | 10.17 | 49066036.0  | 1 (1 0 0 0 0) |
| #68 | unknown protein [Arabidopsis thaliana]               | R.LIVTNLGEQVIEAQIVTGTHAGKMVSIPR.F              | 10.15 | 15241916.0  | 1 (1 0 0 0 0) |
| #69 | EFTU_ARATH RecName: Full=Elongation factor Tu, chlor | K.ILDEALAGDNVGLLR.G                            | 10.15 | 119194.0    | 1 (1 0 0 0 0) |
| #70 | AC018363_34 unknown protein [Arabidopsis thaliana]   | -.MDLVWLLSVLLVGAALGYIYTLR.Q                    | 10.14 | 6728991.0   | 1 (1 0 0 0 0) |
| #71 | hypothetical protein At3g02410 [Arabidopsis tha      | R.RSIVYGGHPRNR.L                               | 10.14 | 91806373.0  | 1 (1 0 0 0 0) |
| #72 | unknown protein [Arabidopsis thaliana]               | R.EAVTFGVTGAALGAVSTAFAWKYSR.S                  | 10.14 | 18390902.0  | 1 (1 0 0 0 0) |
| #73 | PP276_ARATH RecName: Full=Pentatricopeptide repeat   | K.ALCLTESLSAIAENSTLLNLR.L                      | 10.14 | 75183390.0  | 1 (1 0 0 0 0) |
| #74 | DRL18_ARATH RecName: Full=Probable disease resista   | K.ENFVVQASAGLHEIPEVKDWGAVR.R                   | 10.14 | 46395618.0  | 1 (1 0 0 0 0) |

|      |                                                     |                                   |       |             |               |
|------|-----------------------------------------------------|-----------------------------------|-------|-------------|---------------|
| #75  | unknown protein [Arabidopsis thaliana]              | R.IPESLTNIYR.L                    | 10.13 | 21436417.0  | 1 (1 0 0 0 0) |
| #76  | AF332462_1 unknown protein [Arabidopsis thaliana]   | K.TVSDGFVGGFFPVSTTKIAWKSR.K       | 10.13 | 12083332.0  | 1 (1 0 0 0 0) |
| #77  | FAR1_ARATH RecName: Full=Protein FAR-RED IMPAIRED   | R.QSGGYKNIGSLLQTDVSSQVDK.G        | 10.13 | 75213095.0  | 1 (1 0 0 0 0) |
| #78  | AC079284_3 hypothetical protein [Arabidopsis tha]   | K.CCSEAEKEDADGGISDK.V             | 10.13 | 12321786.0  | 1 (1 0 0 0 0) |
| #79  | DEGP3_ARATH RecName: Full=Putative protease Do-lik  | R.LFQPWQITMQSESTGSGFVISGKK.I      | 10.13 | 75265871.0  | 1 (1 0 0 0 0) |
| #80  | unknown protein [Arabidopsis thaliana]              | -.MVFYFKARPDAGDYITFMGLDK.F        | 10.13 | 23297161.0  | 1 (1 0 0 0 0) |
| #81  | GGPP1_ARATH RecName: Full=Geranylgeranyl pyrophosp  | K.IHEAMRYSLLAGGKR.V               | 10.13 | 13432144.0  | 1 (1 0 0 0 0) |
| #82  | RBCMT_ARATH RecName: Full=Probable ribulose-1,5 bi  | K.EYVENEFLL.L                     | 10.13 | 17369870.0  | 1 (1 0 0 0 0) |
| #83  | SBP_ARATH RecName: Full=Putative selenium-binding p | R.QFYPEIMEK.G                     | 10.13 | 6094242.0   | 1 (1 0 0 0 0) |
| #84  | AT4g27860/T27E11_100 [Arabidopsis thaliana]         | R.YTTTATTASGFSQFVGYLVSQWLEK.S     | 10.13 | 17063191.0  | 1 (1 0 0 0 0) |
| #85  | putative rab geranylgeranyl transferase [Arabid]    | K.AFLHKVTSSSELSR.H                | 10.13 | 21436465.0  | 1 (1 0 0 0 0) |
| #86  | PHD finger family protein [Arabidopsis thaliana]    | R.VHVQGVPGDGLGFECVSSVFSR.Q        | 10.13 | 15235176.0  | 1 (1 0 0 0 0) |
| #87  | NUD24_ARATH RecName: Full=Nudix hydrolase 24, chlo  | K.DSCSLVIIDFLFRHGLIRPESPGYLDLYR.R | 10.13 | 68565860.0  | 1 (1 0 0 0 0) |
| #88  | MYB transcription factor [Arabidopsis thaliana]     | R.LMNFILNNGIHCWR.I                | 10.12 | 41619392.0  | 1 (1 0 0 0 0) |
| #89  | ATP binding / kinase [Arabidopsis thaliana]         | R.EAIYKLK.C                       | 10.12 | 240254425.0 | 1 (1 0 0 0 0) |
| #90  | unknown protein [Arabidopsis thaliana]              | R.DSSVFALDSDTGNMIGTNMIK.P         | 10.12 | 145353594.0 | 1 (1 0 0 0 0) |
| #91  | AB5A_ARATH RecName: Full=ABC transporter A family   | K.VYPCRDGNPQKMAVR.G               | 10.11 | 257050992.0 | 1 (1 0 0 0 0) |
| #92  | At3g55910 [Arabidopsis thaliana]                    | R.HPPIDVYICREVTVEMEK.L            | 10.11 | 119360115.0 | 1 (1 0 0 0 0) |
| #93  | MRS23_ARATH RecName: Full=Magnesium transporter MR  | R.TWLVLNSSGQSEPK.E                | 10.11 | 75273604.0  | 1 (1 0 0 0 0) |
| #94  | BG5 (beta-1,3-glucanase 5); glucan 1,3-beta-g       | K.VITLYKSIDITKIR.I                | 10.11 | 15241326.0  | 1 (1 0 0 0 0) |
| #95  | WPP3_ARATH RecName: Full=WPP domain-containing pr   | K.NLEVYGIETSER.M                  | 10.11 | 122175407.0 | 1 (1 0 0 0 0) |
| #96  | unnamed protein product [Arabidopsis thaliana]      | R.GCTSLKSLPEIQLISLK.T             | 10.11 | 257729095.0 | 1 (1 0 0 0 0) |
| #97  | SYK_ARATH RecName: Full=Lysyl-tRNA synthetase; Alt  | R.KADNVNAK.K                      | 10.11 | 55583786.0  | 1 (1 0 0 0 0) |
| #98  | MYRS2_ARATH RecName: Full=Myrcene/ocimene synthase  | R.FVETAMNLAR.M                    | 10.11 | 75273871.0  | 1 (1 0 0 0 0) |
| #99  | unnamed protein product [Arabidopsis thaliana]      | R.ESLVTRLFTSAENKR.M               | 10.11 | 9758394.0   | 1 (1 0 0 0 0) |
| #100 | AF454354_1 sulfolipid synthase [Arabidopsis thal]   | R.AGGIPDIIPEDQEGK.T               | 10.11 | 20302857.0  | 1 (1 0 0 0 0) |

|      |                                                                      |                        |       |             |               |
|------|----------------------------------------------------------------------|------------------------|-------|-------------|---------------|
| #101 | unknown protein [Arabidopsis thaliana]                               | R.KIVAQGSR.L           | 10.11 | 3341696.0   | 1 (1 0 0 0 0) |
| #102 | anthranilate N-hydroxycinnamoyl/benzoyltransfer                      | R.IPLPETETPNR.V        | 10.10 | 21536885.0  | 1 (1 0 0 0 0) |
| #103 | AC025294_6 NADP-specific glutamate dehydrogenase                     | K.TVMSKSAGSIVEGALK.R   | 10.10 | 12321666.0  | 1 (1 0 0 0 0) |
| #104 | AC022456_5 Tam1 transposon protein TNP2, putative                    | K.FLKDFVRNPAR.P        | 10.10 | 12324112.0  | 1 (1 0 0 0 0) |
| #105 | AC012562_29 hypothetical protein; 78804-81924 [Arabidopsis thaliana] | K.PEDKLFGLVELSKFK.K    | 10.10 | 12322744.0  | 1 (1 0 0 0 0) |
| #106 | ALFC1_ARATH RecName: Full=Probable fructose-bisphosphate phosphatase | K.MVDVLEQNIIVPGIKVVK.G | 10.10 | 75313518.0  | 1 (1 0 0 0 0) |
| #107 | SYP73_ARATH RecName: Full=Syntrophin-73; Short=AtSYP73               | K.GLSKEELDAR.N         | 10.10 | 28380157.0  | 1 (1 0 0 0 0) |
| #108 | putative pre-mRNA splicing factor [Arabidopsis thaliana]             | K.GVKLIPNSVKLWLEAAK.L  | 10.10 | 4206197.0   | 1 (1 0 0 0 0) |
| #109 | AC022456_2 hypothetical protein; 33648-34648 [Arabidopsis thaliana]  | K.ISVARAKFK.P          | 10.10 | 12324109.0  | 1 (1 0 0 0 0) |
| #110 | ATP binding / nucleoside-triphosphatase/                             | K.RNASAAADISSISSR.S    | 10.10 | 145334803.0 | 1 (1 0 0 0 0) |
| #111 | unknown protein [Arabidopsis thaliana]                               | R.MSNKQKK.E            | 10.10 | 14532606.0  | 1 (1 0 0 0 0) |
| #112 | hypothetical protein [Arabidopsis thaliana]                          | -.MFGSLVYPKK.V         | 10.10 | 3643596.0   | 1 (1 0 0 0 0) |
| #113 | NUA_ARATH RecName: Full=Nuclear-pore anchor; AltN                    | K.EDALLSASAEIASLR.E    | 10.10 | 302425121.0 | 1 (1 0 0 0 0) |
| #114 | unknown protein [Arabidopsis thaliana]                               | K.ELQILEYGESDDEVKR.L   | 10.10 | 238478373.0 | 1 (1 0 0 0 0) |
| #115 | AC011622_2 unknown protein; 58777-61253 [Arabidopsis thaliana]       | K.SQDLLLKKLHEK.C       | 10.10 | 12324935.0  | 1 (1 0 0 0 0) |
| #116 | At4g21500 [Arabidopsis thaliana]                                     | R.ESDLMGGFVEWNL.R      | 10.10 | 45752754.0  | 1 (1 0 0 0 0) |
| #117 | FPP7_ARATH RecName: Full=Filament-like plant protein                 | K.ASQEYER.R            | 10.10 | 75206690.0  | 1 (1 0 0 0 0) |

Supplemental Table 2. Primers for plasmid construction and PCR

| primer                            |                          | sequence |                                        |
|-----------------------------------|--------------------------|----------|----------------------------------------|
| <b>For transgenic line</b>        |                          |          |                                        |
| HJ1                               | <i>35S-myc:FRI</i>       | F        | 5'-aaaaggatccaaATGTCCAATTATCCACCGAC    |
|                                   |                          | R        | 5'-ttttggatccCTATTTGGGGTCTAATGATG      |
| KH160                             | <i>35S-myc:FLX</i>       | F        | 5'-ggatccgtATGGCCGGACGAGATCGTTA        |
|                                   |                          | R        | 5'-ggatccCTATAGACTCATGTGTAC            |
| KH169                             | <i>proFLX-FLX:GUS</i>    | F        | 5'-ctgcagGACTAGCTTGTGACCATCGC          |
|                                   |                          | R        | 5'-ggatccttAACTGTGTAAAGCAAAAAGC        |
| SIRI169                           | <i>proSUF4-SUF4-FLAG</i> | F        | 5'-ctgcagATCTTTAACTTTTTTGTGTTGC        |
|                                   |                          | R        | 5'-tctagaCACTAAATCTTCTCCTATTTG         |
|                                   |                          | F        | 5'-ggatccATGGGTAAGAAGAAGAAGAG          |
|                                   |                          | R        | 5'-ggatccCTAAAACGCCATCCGCC             |
| SIRI172                           | <i>proFRI-FLAG-FRI</i>   | F        | 5'-ctgcagTATAAGAAAGTTACGAAAATGCC       |
|                                   |                          | R        | 5'-tctagaGAGATTGCGGCGAAGAAAA           |
|                                   |                          | F        | 5'-gtcgacATGTCCAATTATCCACC             |
|                                   |                          | R        | 5'-gtcgacCTATTTGGGGTCTAATGATG          |
|                                   | <i>35S-OsSUF4</i>        | F        | 5'-aaaaggatccaaATGGGGAAGAAGAAG         |
|                                   |                          | R        | 5'-ccggatccTTACACAATATTCCAG            |
| <b>For yeast two hybrid assay</b> |                          |          |                                        |
| KH185                             | AD/BD-FLX                | F        | 5'-ggatccgtATGGCCGGACGAGATCGTTA        |
| KH184                             |                          | R        | 5'-ggatccCTATAGACTCATGTGTAC            |
| KH211                             | AD/BD-FES1               | F        | 5'-agatctgtATGTCTGATCCGACATG           |
| KH210                             |                          | R        | 5'-agatctGGGTTTACCATACTTTTC            |
| KH344                             | AD/BD-FLX-D1             | F        | 5'-gtagcccggggATCCTCGAGGATCGAATCGC     |
| KH342                             |                          | R        | 5'-ggatccCTATAGACTCATGTGTAC            |
| KH345                             | AD/BD-FLX-D2             | F        | 5'-gtagcccggggATGGCTAAGGCTAAACCGAA     |
| KH343                             |                          | R        | 5'-ggatccCTATAGACTCATGTGTAC            |
| KH331                             | AD/BD-SUF4-D1            | F        | 5'-ggatccgtATGGGTAAGAAGAAGAAGAGA       |
| KH330                             |                          | R        | 5'-ggatccATCCTCTTCTTCCATAATG           |
| KH333                             | AD/BD-SUF4-D2            | F        | 5'-ggatccgtATGGGTAAGAAGAAGAAGAGA       |
| KH332                             |                          | R        | 5'-ggatccTGGAGTTGGAGTCATCCCCAT         |
| KH335                             | AD/BD-SUF4-D3            | F        | 5'-ggatccgtAATGTTACAAAAGTTCTAAT        |
| KH334                             |                          | R        | 5'-ggatccCTAAAACGCCATCCGCCCAGC         |
| KH271                             | AD/BD-FRI-D1             | F        | 5'-ggatccgtATGTCCAATTATCCACCGAC        |
| KH270                             |                          | R        | 5'-ggatccCCATCCTGGTAGTTCTTTTCGC        |
| KH273                             | AD/BD-FRI-D2             | F        | 5'-ggatccgtAAGCAGCCTCAATTTTTGAAATCC    |
| KH272                             |                          | R        | 5'-ggatccTTGGTTATACATTCTCTTGGC         |
| KH275                             | AD/BD-FRI-D3             | F        | 5'-ggatccgtGGCGTTGTCCTCGCCGCG          |
| KH274                             |                          | R        | 5'-ggatccCTATTTGGGGTCTAATGATG          |
| KH341                             | AD/BD-FRI-D4             | F        | 5'-ggatccccATGGAAATGCCACCAGTAAC        |
| KH340                             |                          | R        | 5'-ggatccCTATTTGGGGTCTAATGATG          |
| SIRI134                           | BD-PIE1                  | F        | 5'-atgcggatccatATGGCGTCTAAAGGTGGTAAATC |



|         |                 |   |                                              |
|---------|-----------------|---|----------------------------------------------|
|         |                 | R | 5'-atgc <u>gga</u> tccCTACTCTATTTCTGAGATATC  |
| SIRI73  | BD-RVB1         | F | 5'-atgc <u>gaa</u> tccATGGAGAAAGTAAAGATTGAAG |
|         |                 | R | 5'-atgc <u>gaa</u> tccTCATGAGATGTATTTTTCTTG  |
| SIRI72  | BD-YAF9         | F | 5'-atgc <u>gga</u> tccatATGACGAACAGCTCGTCA   |
|         |                 | R | 5'-atgc <u>gga</u> tccTCACAGGTCTGATCCTGT     |
| SIRI71  | BD-SWC5         | F | 5'-atgc <u>gga</u> tccatATGGGATCTCATGAGCAATC |
|         |                 | R | 5'-atgc <u>gga</u> tccTCATACATCATCGTGTCTTCT  |
| SIRI70  | BD-ACT1         | F | 5'-atgc <u>gga</u> tccatATGGCTGATGGTGAAGAC   |
|         |                 | R | 5'-atgc <u>gga</u> tccTCAGAAGCACTTCCTGTG     |
| SIRI69  | BD-ARP4         | F | 5'-atgc <u>gga</u> tccatATGTACGGCGGAGATGAA   |
|         |                 | R | 5'-atgc <u>gga</u> tccTTAAGGGCATTCTCTGAAATG  |
| KH364   | AD/BD-FLX LIKE1 | F | 5'-gtagcc <u>ggg</u> ATGTCTGGAAGAAACCGGAT    |
| KH350   |                 | R | 5'-gtac <u>gga</u> tccTCAATGACGATCCAAACGAG   |
| KH363   | AD/BD-FLX LIKE2 | F | 5'-gtagcc <u>ggg</u> ATGGAAAGCAAAGGAAGAAT    |
| KH349   |                 | R | 5'-gtac <u>gga</u> tccTCATCTGCGACTAGGGTTTC   |
| KH362   | AD/BD-FLX LIKE3 | F | 5'-gtagcc <u>ggg</u> ATGTCTGGAAGAAATCGTGG    |
| KH348   |                 | R | 5'-gtac <u>gga</u> tccTCATCGATGTCCTTGTCCTT   |
| KH365   | AD/BD-FLX LIKE4 | F | 5'-gtag <u>gaa</u> tccATGTCTTCAAGGGAGAGGAT   |
| KH351   |                 | R | 5'-gtagcc <u>ggg</u> TCAATTCTCGACAGCTTTGT    |
| SIRI186 | AD/BD-TAF14     | F | 5'- <u>gga</u> tccgtATGGAGTCGGATATCGAGATTTTG |
| SIRI183 |                 | R | 5'- <u>gga</u> tccTCAGAACAAGAATGCACCTGG      |
| SIRI180 | BD-FES1-D3      | F | 5'- <u>aga</u> tctgtATGTCTGATTCCGACATG       |
|         |                 | R | 5'- <u>aga</u> tctAACAAAAACGTGCAGCTCTTC      |
| SIRI182 | BD-FES1-D4      | F | 5'- <u>aga</u> tctAACAAAAACGTGCAGCTCTTC      |
|         |                 | R | 5'- <u>aga</u> tctGGGTTTACCATACTTTTC         |

---

#### For bimolecular fluorescence complementation

---

|       |           |   |                                           |
|-------|-----------|---|-------------------------------------------|
| KH518 | nYFP-FLX  | F | 5'- <u>gga</u> tccgtATGGCCGACGAGATCGTTA   |
|       |           | R | 5'- <u>gga</u> tccCTATAGACTCATGTGTAC      |
| KH523 | cYFP-FLX  | F | 5'- <u>gga</u> tccATGGCCGACGAGATCGTTA     |
|       |           | R | 5'- <u>gga</u> tccCTATAGACTCATGTGTAC      |
| KH519 | nYFP-SUF4 | F | 5'- <u>gga</u> tccgtATGGGTAAGAAGAAGAAGA   |
|       |           | R | 5'- <u>gga</u> tccCTAAAACGCCATCCGCCCAGC   |
| KH524 | cYFP-SUF4 | F | 5'- <u>gga</u> tccATGGGTAAGAAGAAGAAG      |
|       |           | R | 5'- <u>gga</u> tccCTAAAACGCCATCCGCCCAGC   |
| KH520 | nYFP-FRL1 | F | 5'- <u>gga</u> tccgtATGACGGCGAGTGAGACTATC |
|       |           | R | 5'- <u>gga</u> tccCTACTGAGAATAATAAGGCGG   |
| KH525 | cYFP-FRL1 | F | 5'- <u>gga</u> tccATGACGGCGAGTGAGACT      |
|       |           | R | 5'- <u>gga</u> tccCTACTGAGAATAATAAGGCGG   |
| KH521 | nYFP-FES1 | F | 5'- <u>aga</u> tctgtATGTCTGATTCCGACATG    |
|       |           | R | 5'- <u>aga</u> tctGGGTTTACCATACTTTTC      |
| KH526 | cYFP-FES1 | F | 5'- <u>aga</u> tctATGTCTGATTCCGACATG      |
|       |           | R | 5'- <u>aga</u> tctGGGTTTACCATACTTTTC      |
| KH522 | nYFP-FRI  | F | 5'- <u>gga</u> tccgtATGTCCAATTATCCACCGAC  |
|       |           | R | 5'- <u>gga</u> tccCTATTTGGGGTCTAATGATG    |

|       |            |   |                                                 |
|-------|------------|---|-------------------------------------------------|
| KH527 | cYFP-FRI   | F | 5'- <u>ggatcc</u> ATGTCCAATTATCCACCGAC          |
|       |            | R | 5'- <u>ggatcc</u> CTATTTGGGGTCTAATGATG          |
| KH614 | nYFP-SUF3  | F | 5'- <u>ggatcc</u> atATATGTCAAACATCGTTGTTC       |
|       |            | R | 5'- <u>ggatcc</u> TCAATGAAAGAATCGTCTACG         |
| KH615 | cYFP-SUF3  | F | 5'- <u>ggatcc</u> ATATGTCAAACATCGTTGTTC         |
|       |            | R | 5'- <u>ggatcc</u> TCAATGAAAGAATCGTCTACG         |
| KH595 | nYFP-SWC6  | F | 5'- <u>ggatcc</u> gATGGAGGAAGAGATGTCTGAAC       |
|       |            | R | 5'- <u>ggatcc</u> CTATGCAACAAATTTCTGACA         |
| KH596 | cYFP-SWC6  | F | 5'- <u>ggatcc</u> ATGGAGGAAGAGATGTCTGAAC        |
|       |            | R | 5'- <u>ggatcc</u> CTATGCAACAAATTTCTGACA         |
| KH597 | nYFP-YAF9  | F | 5'- <u>ccccggatcc</u> gATGACGAACAGCTCGTCATCGAAG |
|       |            | R | 5'- <u>ccccggatcc</u> ACAGGTCTGATCCTGTTTTAACGGT |
| KH598 | cYFP-YAF9  | F | 5'- <u>ccccggatcc</u> ATGACGAACAGCTCGTCATCGAAG  |
|       |            | R | 5'- <u>ccccggatcc</u> ACAGGTCTGATCCTGTTTTAACGGT |
| KH599 | nYFP-TAF14 | F | 5'- <u>ggatcc</u> gATGGAGTCGGATATCGAGATTTTG     |
|       |            | R | 5'- <u>ggatcc</u> TCAGAACAAGAATGCACCTGG         |
| KH600 | cYFP-TAF14 | F | 5'- <u>ggatcc</u> ATGGAGTCGGATATCGAGATTTTG      |
|       |            | R | 5'- <u>ggatcc</u> TCAGAACAAGAATGCACCTGG         |
| KH610 | nYFP-EFS-N | F | 5'- <u>ccccggatcc</u> gATGGACTGTAAGGAAAACG      |
|       |            | R | 5'- <u>ccccggatcc</u> GATTACCAAGCAAGACCACT      |
| KH611 | cYFP-EFS-N | F | 5'- <u>ccccggatcc</u> ATGGACTGTAAGGAAAACGGTGT   |
|       |            | R | 5'- <u>ccccggatcc</u> GATTACCAAGCAAGACCACT      |

---

**For protein localization**

|       |          |   |                                             |
|-------|----------|---|---------------------------------------------|
| KH455 | CFP-FES1 | F | 5'- <u>ggattagatct</u> ATGTCTGATTCCGACATGGA |
|       |          | R | 5'- <u>ggattaggcct</u> GGGTTTACCATACTTTTCGA |

---

**For yeast one hybrid & EMSA**

|       |                             |   |                                               |
|-------|-----------------------------|---|-----------------------------------------------|
| KH185 | AD/BD-FLX                   | F | 5'- <u>ggatcc</u> gATGGCCGGACGAGATCGTTA       |
| KH184 |                             | R | 5'- <u>ggatcc</u> CTATAGACTCATGTGTAC          |
| KH211 | AD/BD-FES1                  | F | 5'- <u>agatct</u> gATGTCTGATTCCGACATG         |
| KH210 |                             | R | 5'- <u>agatct</u> GGGTTTACCATACTTTTC          |
| KH376 | BD-VP16                     | F | 5'- <u>ggatcc</u> ttGCCCGCCGACCGATGTACG       |
|       |                             | R | 5'- <u>gggagatct</u> TTACCCACCGTACTCGTCAA     |
| KH344 | AD/BD-FLX-D1                | F | 5'- <u>gtagcccgagg</u> ATCCTCGAGGATCGAATCGC   |
| KH342 |                             | R | 5'- <u>ggatcc</u> CTATAGACTCATGTGTAC          |
| KH345 | AD/BD-FLX-D2                | F | 5'- <u>gtagcccgagg</u> ATGGCTAAGGCTAAACCGAA   |
| KH343 |                             | R | 5'- <u>ggatcc</u> CTATAGACTCATGTGTAC          |
| KH398 | proFLC 2kb-LacZi            | F | 5'- <u>ggggagtcgac</u> AGAAATAATTTTCATATGGAG  |
|       |                             | R | 5'- <u>ggggactcgag</u> GGCTTCTCTCCGAGAGGGC    |
| KH419 | FLC 1st exon & intron-LacZi | F | 5'- <u>ggggcc</u> ATGGGAAGAAAAAACTA           |
|       |                             | R | 5'- <u>ccccggatcc</u> ttATCAAGGATCTTGACCAGGCT |
| KH542 | proFLC (-1916~ -546)-LacZi  | F | 5'- <u>ggggggatcc</u> AGAAATAATTTTCATATGGAG   |
|       |                             | R | 5'-CAAGAAATCTTAAATGTCCACACA                   |
| KH543 | proFLC (-1546~ -367)-       | F | 5'-TTGAAAGTCTTTGTAGGTTTGGTT                   |

|       |                                  |   |                                                 |
|-------|----------------------------------|---|-------------------------------------------------|
|       | LacZi                            | R | 5'-GTGTTACCAAAGTCGTGCCTAC                       |
| KH544 | proFLC (-1443~ -249)-<br>LacZi   | F | 5'-GGTAGCCAAAGATTTGGG                           |
|       |                                  | R | 5'-ATTGCAGAAAGAACCTCCAC                         |
| KH545 | proFLC (-1172~ -129)-<br>LacZi   | F | 5'-AAATGTTTGTGTGGCTCCAA                         |
|       |                                  | R | 5'-AAGACAAGATTGCCACGTGTA                        |
| KH546 | proFLC(-1172~ -367)-LacZi        | F | 5'-AAATGTTTGTGTGGCTCCAA                         |
|       |                                  | R | 5'-GTGTTACCAAAGTCGTGCCTAC                       |
| KH547 | proFLC(-648~ -129)-LacZi         | F | 5'-GCTGATACAAGCATTTACCA                         |
|       |                                  | R | 5'-AAGACAAGATTGCCACGTGTA                        |
| KH552 | proFLC(-2347~ -1426)-<br>LacZi   | F | 5'-TGCCTTGAAGAAATGATAATTGA                      |
|       |                                  | R | 5'-CCCAAATCTTTGGCTACCAT                         |
| KH548 | proFLC(-580~ -249)-LacZi         | F | 5'-CTATTGCCATATGTGTGGAC                         |
|       |                                  | R | 5'-ATTGCAGAAAGAACCTCCAC                         |
| KH549 | proFLC(-849~ -547)-LacZi         | F | 5'-TCGTTTATTGTGTTACCATT                         |
|       |                                  | R | 5'-AAGAAATCTTAAATGTCC                           |
| KH580 | proFLC(-580~ -351)-LacZi         | F | 5'-CTATTGCCATATGTGTGGAC                         |
|       |                                  | R | 5'-GGCAGTTAATTAGTAGGTGTTACCAAAGTCGTGC           |
| KH578 | proFLC(-580~ -331)-LacZi         | F | 5'-CTATTGCCATATGTGTGGAC                         |
|       |                                  | R | 5'-CTTCTCAAACCTTAAAATTTGGCAGTTAATTAG            |
| KH569 | proFLC(-580~ -316)-LacZi         | F | 5'-CTATTGCCATATGTGTGGAC                         |
|       |                                  | R | 5'-TTTGAACCTCTCCGACTTCTCAAAAC                   |
| KH575 | proFLC(-363~ -249)-LacZi         | F | 5'-CTAATTAAGTCCAAATTTAAGTTTTGAGAAG              |
|       |                                  | R | 5'-ATTGCAGAAAGAACCTCCAC                         |
| KH553 | proFLC(-319~ -249)-LacZi         | F | 5'-GTTTTGAGAAGTCGGAAGAGTTCAAA                   |
|       |                                  | R | 5'-ATTGCAGAAAGAACCTCCAC                         |
| KH571 | proFLC(-492~ -316)-LacZi         | F | 5'-TTTGTGTTAATCTCCCGAACA                        |
|       |                                  | R | 5'-TTTGAACCTCTCCGACTTCTCAAAAC                   |
| KH556 | proFLC(-341~ -316)-LacZi         | S | 5'-GTTTTGAGAAGTCGGAAGAGTTCAAA                   |
|       |                                  | A | 5'-TTTGAACCTCTCCGACTTCTCAAAAC                   |
| KH572 | proFLC(-363~ -331)-LacZi<br>/ WT | S | 5'-CTAATTAAGTCCAAATTTAAGTTTTGAGAAG              |
|       |                                  | A | 5'-CTTCTCAAACCTTAAAATTTGGCAGTTAATTAG            |
| KH573 | proFLC(-374~ -341)-LacZi         | S | 5'-GGTAACACCTACTAATTAAGTCCAAATTTAAG             |
|       |                                  | A | 5'-CTTAAAATTTGGCAGTTAATTAGTAGGTGTTACC           |
| KH574 | proFLC(-384~ -351)-LacZi         | S | 5'-GCACGACTTTGGTAACACCTACTAATTAAGTCC            |
|       |                                  | A | 5'-GGCAGTTAATTAGTAGGTGTTACCAAAGTCGTGC           |
| KH589 | proFLCm1-LacZi                   | S | 5'-CTAATTAAGTCC <b>Aggg</b> TTTAAGTTTTGAGAAG    |
|       |                                  | A | 5'-CTTCTCAAACCTTAAA <b>ccc</b> TGGCAGTTAATTAG   |
| KH590 | proFLCm2-LacZi                   | S | 5'-CTAATTAAGTCCAAAT <b>ggg</b> AAGTTTTGAGAAG    |
|       |                                  | A | 5'-CTTCTCAAACCTT <b>ccc</b> ATTTGGCAGTTAATTAG   |
| KH591 | proFLCm3-LacZi                   | S | 5'-CTAATTAAGTCCAAATTTT <b>gga</b> TTTTGAGAAG    |
|       |                                  | A | 5'-CTTCTCAAATA <b>tcc</b> AAAATTTGGCAGTTAATTAG  |
| KH592 | proFLCm4-LacZi                   | S | 5'-CTAATTAAGTCCAAATTTAAG <b>ggg</b> TGAGAAG     |
|       |                                  | A | 5'-CTTCTCA <b>ccc</b> CTTAAAATTTGGCAGTTAATTAG   |
| KH593 | proFLCm5-LacZi                   | S | 5'-CTAATTAAGTCCAAATTTAAGTTT <b>gag</b> GAAG     |
|       |                                  | A | 5'-CTTCT <b>ctc</b> AAACCTTAAAATTTGGCAGTTAATTAG |

|       |                |   |                                                |
|-------|----------------|---|------------------------------------------------|
| KH594 | proFLCm6-LacZi | S | 5'-CTAATTAAGTCCAAATTTTAAGTTTTGA <b>accG</b>    |
|       |                | A | 5'-C <b>ggf</b> TCAAAACTTAAAAATTTGGCAGTTAATTAG |
| KH618 | proFLCm7-LacZi | S | 5'-CTAATTAAGT <b>Gaag</b> AATTTTAAGTTTTGAGAAG  |
|       |                | A | 5'-CTTCTCAAAACTTAAAAAT <b>ctt</b> CAGTTAATTAG  |
| KH619 | proFLCm8-LacZi | S | 5'-CTAATTA <b>aga</b> CCAAATTTTAAGTTTTGAGAAG   |
|       |                | A | 5'-CTTCTCAAAACTTAAAAATTTGG <b>tcf</b> TTAATTAG |
| KH620 | proFLCm9-LacZi | S | 5'-CTAAT <b>cgg</b> CTGCCAAATTTTAAGTTTTGAGAAG  |
|       |                | A | 5'-CTTCTCAAAACTTAAAAATTTGGCAG <b>ccg</b> ATTAG |

---

**For quantitative-PCR**


---

|        |   |                               |
|--------|---|-------------------------------|
| FLC-1Q | F | 5'-TGCCTTGAAGAAATGATAATTGA    |
|        | R | 5'-GGTGAATGTACGGCATGATT       |
| FLC-2Q | F | 5'-TTGAAAGTCTTTGTAGTTTGTT     |
|        | R | 5'-CCCAAATCTTTGGCTACCAT       |
| FLC-3Q | F | 5'-AAATGTTTGTGTGGCTCCAA       |
|        | R | 5'-CGATATTGGTGATTGGTATTAACTTT |
| FLC-4Q | F | 5'-GCTGATACAAGCATTTCACCA      |
|        | R | 5'-CAAGAAATCTTAAATGTCCACACA   |
| FLC-5Q | F | 5'-TTTGTGTTAATCTCCCGAACA      |
|        | R | 5'-GTGTTACCAAAGTCGTGCCTAC     |
| FLC-6Q | F | 5'-GAGTGGAGGTTCTTTCTGCAA      |
|        | R | 5'-AAGACAAGATTGCCACGTGTA      |
| FLC-7Q | F | 5'-TGCATGTCATTACGATTTG        |
|        | R | 5'-AGATGGCTTGAAACTCACTCA      |
| FLC-8Q | F | 5'-AGTAGTTTGCCATGTTGGTC       |
|        | R | 5'-GTCTCGACAATTCCAAGGCT       |
| FLC-1  | F | 5'-CTTCGTCGGGCCAGATATT        |
|        | R | 5'-CGAAAGTGAAAATAAGGCAATG     |
| FLC-2  | F | 5'-GGATGCGTCACAGAGAACAG       |
|        | R | 5'-GAACCCAAACCTGAGGATCA       |
| FLC-3  | F | 5'-TCCCGTAAGTGCATTGCATA       |
|        | R | 5'-CGTGCTCGATGTTGTTGAGT       |
| Ta3    | F | 5'-TGGAATCTCAGGGTCAAGG        |
|        | R | 5'-CCTTCTGAGGTGAGGGACA        |
| ACTIN  | F | 5'-AGTGTGTCTTGTCTTATCTGGTTCG  |
|        | R | 5'-AATAGCTGCATTGTCACCCGATACT  |
| TUB2p  | F | 5'-ACAAACACAGAGAGGAGTGAGCA    |
|        | R | 5'-ACGCATCTTCGTTGGATGAGTGA    |

---

**For reverse transcription-PCR**


---

|                 |   |                         |
|-----------------|---|-------------------------|
| FLX / AT2G30120 | F | 5'-ATGGCCGGACGAGATCGTTA |
|                 | R | 5'-TCACCTTCCTTTACGAATCT |
| AT5G04830       | F | 5'-TGCGAATTGAAATCGAACAA |
|                 | R | 5'-CTCCATTACCCGTCGACTA  |
| AT3G18490       | F | 5'-AAGCGGCGAGTATTTCTCAA |

|           |   |                         |
|-----------|---|-------------------------|
|           | R | 5'-CAAGATCACTCCTCCGCTTC |
| AT5G26040 | F | 5'-CTTTACCCATTCCGAAAGCA |
|           | R | 5'-ACTTCATGTACCCGCCTGAG |
| AT5G04840 | F | 5'-ACCTGCTTGGCTTGATGAGT |
|           | R | 5'-AGTATCGCCATCTGCTGCTT |
| AT3G18500 | F | 5'-TCTTTCGTGTGTTGCTCCTC |
|           | R | 5'-CCAGCTTCACATCTCCTTGA |

---

## Supplemental Dataset 1:

Sequences used for phylogenetic analysis in Supplemental Figure 7A (FASTA format)

## &gt;At-FLX

MAGRDRYIPSSAVSTSSSSRLLESQLIESDRNRARSVILEDRIAIQHREIQSLLNDNQRLAVAHIGLKDQLNVAKRELER  
LLETAVKVKAEGEAKVREVYQNALRMEAEARVIDGLGAELGQVRSDVQRLGSDRQELATELAMFDDDEMAKAKPNSDRAIE  
VKLEIEILRGEIRKGRAALELEKKTRASNLHHERGMEKTIDHLNREIVKLEELVDLETKAREANAAAAEAAPTSPGLAA  
SYGNNTDDIYGGQGRQYPEANGTHEVHMSL

## &gt;At-AT3G14750

MSGNRNRPSPSMKGGYSGLQAPVHQPPFVRGLGGGPVPPPHPSMIDDSREPQFRVDARGLPPQFSILEDRLAAQNQD  
VQGLLADNQRLAATHVALKQELEVAQHQLRIMHYIDSLRAEEEIMMREMYDKSMRSEMELREVDAMRAEIQKIRADIKE  
FTSGRQELTSQVHLMTQDLARLTADLQQIPTLTAEIENKQELQRARAAIDYEKKGYAENYEHGKIMEHKLVMARELEK  
LRAEIANSETSAANGPVGPNPGGVAYGGGYGNPEAGYPVNPYQPNYTMNPAQTGVVGYPPPYGPQAAWAGGYDPQQQQ  
QQPPPQGGHR

## &gt;At-AT1G55170

MSGNRNRIHRDIRDSYHDHRLPPERPFRLRGPPLQPPPSLLEDLQIQEGERIRRDQAEIRRLSDNHGLADDRMVLEREL  
VAAKEELHRMNLMSIDLRAEQDLQLREFSEKRHKLEGDVRAMESYKKEASQLRGEVQKLDEIKRELSGNVQLLRKDLAKL  
QSDNKQIPGMRAEVKDLQKELMHARDAIEYEKKEKFEELMEQRQTMEKNMVSMAREVEKLRAELATVDSRPWGFGGSYGMN  
YNNMDGTFRGSYGENDTYLGSSERSQYYSHGSGSQKKPRLDRH

## &gt;At-AT5G61920

MSSRERIGSNHHSRVSQGMSTSGSSSRHHDTSSTSDPRHLRDHQISLSDILENKIIVQAAEIDRLSNDNRKLASSYVA  
LKEDLTVADREVQGLRAHIRKTETDHEIQIRSTLEKIAKMEGMVKNRENIRREVQSAHIEAHLAREREELASKVKLGMK  
DLKKVCLEAESLEASSQELERLKEEHQRLRKEFEEEEKSGNVEKLAQLKGMERKIIIGAVKAIKELRSEIISTARNKAVEN

## &gt;At-AT1G67170

MESKGRIPHSHHMRRPLPGPGGCIAHPETFNGHGAIPPSAAQGVYPSFNMLPPPEVMEQKFVAQHAGELQRLAIENQRLG  
GTHGSLRQELAAAQHEIQMLHAQIGSMKSEREQRMMGLAEKVAKMETELQKSEAVKLEMQQARAEARSLVVAREELMSKV  
HQLTQELQKSRSDVQQIPALMSELENLRQEYQQCRATYDYEKKFYNDHLESQAMEKNYMTMAREVEKLQAQLMNNANS  
RRAGGPYGNINAEIDASGHQSGNGYEDAFGPQGYIPQPVAGNATGPNSSVVGAAQYQYQGVTPQPGYFPQRPYGFPRGP  
PGSYDPTTRLPTGPYGAFFPPGPSNNTPYAGTHGNPSRR

## &gt;At-SMC3

MEEDEPMGGGESEPEQRKSGTPRLYIKELVMRNFKSYAGEQVRVGFHKSFSAVVGPNGSGKSNVIDAMLVVFVGGKRAKQMR  
LNKVSLEIHNSTNHQNLDSAGVSVQFEEIIDLENGLYETVPGSDFMITRVAFRDNSSKYYINERSSNFTEVTKKLKGGV  
DLNDRFLILQGEVEQISLMKPKAQGPHDEGFLEYLEDIIGTNKYVEKIDELNKQLETLNESRSGVVQMVKLAEKERDNL  
EGLKDEAETYMLKELSHLKWQEKATKMAYEDTVAKITEQRDSLQNLNSLKDERVKMDESNEELKKFESVHEKHKRQEV  
LDNELRACKEKFKFERQDVKHREDLKHVKQKIKKLEDKLEKDSKIGDMTKESEDSSNLI PKLQENI PKLQKVLLEEK  
KLEEIKAIKAVETEGYRSELTKIRAELEPWEKDLIVHRGKLDVASSESELLSKKHEAALKAFTDAQKQLSDISTRKKEKA  
AATTSWKADIKKKQEAIEARKVEEESLKEQETLVPQEAAREKVAELKSAMNSEKSQNEVLKAVLRKENNQIEGIYGR  
MGDLGAIDAKYDVAISTACAGLDYIVVETTSSAQACVELLRKGNLGFATFMILEKQTDHIHKLKEKVKTPELVPRFLDLV  
RVKDERMKLAFYAALGNTVVAKDLQATRIAYGGNREFRRVVALDGFALFEKSGTMSGGGKARGGRMGTSIRATGVS  
VANAENELSKIVDMLNIREKVGNAVRQYRAAENEVSGLEMELAKSQREIESLNSEHNYLEKQLASLEAASQPKTDEIDR  
LKELKKIISKEEKEIENLEKGSQKLDKALELQTNIEENAGGEKLGKQAKVEKIQTIDIKNNTIEINRCNVQIETNQKLIK  
KLTGIEEATREKERLEGEKENLHVTFKDIQKAFEIQETYKKTQQLIDEHKDVLGTGAKSDYENLKKSVDELKASRVDAE  
FKVQDMKKKYNELEMREKGYKKKLNLDLQIAFTKHMEQIQKDLVDPDKLQATLMDNNLNEACDLKRALEMVALLEAQLKEL  
NPNLDSIAEYRSKVELYNGRVDELNSVTQERDDTRKQYDELKRRLDEFMAGFNTISLKLKEMYQMITLGGDAEELVDS  
LDPFSEGVVFSVRPPKSWKNIANLSGGEKTLSSLALVFALHHYKPTPLYVMDEIDAALDFKNVSI VGHYVKDRTKDAQF  
IIISLRNNMFEADRLVGIYKTDNCTKSITINPGSFAVCQKTPA

Alignment used for phylogenetic analysis in Supplemental Figure 7A

```

AT3G14750 -----
AT1G67170 -----
AT1G55170 -----
AT5G61920 -----
FLX -----
SMC3      MEEDEPMTGGGESEPEQRKSGTPRLYIKELVMRNFKSYAGEQRVGPFHKSFSAVVGPNGSG
    
```

```

AT3G14750 -----
AT1G67170 -----
AT1G55170 -----
AT5G61920 -----
FLX -----
SMC3      KSNVIDAMLFFVFGKRAKQMRNLNKVSELIHNSTNHQNLDSAGVSVQFEEIIDLENGLYETV
    
```

```

AT3G14750 -----
AT1G67170 -----
AT1G55170 -----
AT5G61920 -----
FLX -----
SMC3      PGSDFMITRVAFRDNSSKYYINERSSNFTEVTKKLKGGVDLDNNRFLILQGEVEQISLM
    
```

```

AT3G14750 -----
AT1G67170 -----
AT1G55170 -----
AT5G61920 -----
FLX -----
SMC3      KPKAQGPHEGFLYLEDIIGTNKYVEKIDELNKQLETLNESRSGVVQMVKLAEKERDNL
    
```

```

AT3G14750 -----
AT1G67170 -----
AT1G55170 -----
AT5G61920 -----
FLX -----
SMC3      EGLKDEAETYMLKELSHLKWQEKATKMAYEDTVAKITEQRDSLQNLNSLKDERVKMDES
    
```

```

AT3G14750 -----
AT1G67170 -----
AT1G55170 -----
AT5G61920 -----
FLX -----
SMC3      NEELKKFESVHEKHKKRQEVLDNELRACKEKFKEFERQDVKHREDLKHVKQKIKKLEDKL
    
```

```

AT3G14750 -----
AT1G67170 -----
AT1G55170 -----
AT5G61920 -----
FLX -----
SMC3      EKDSSKIGDMTKESEDSSNLI PKLQENI PKLQKVL LDEEKLEEIKAIKVETEGYRSEL
    
```

AT3G14750 -----  
 AT1G67170 -----  
 AT1G55170 -----  
 AT5G61920 -----  
 FLX -----  
 SMC3 TKIRAELEPWEKDLIVHRGKLDVASSESELLSKKHEAALKAFDTAQQQLSDISTRKKEKA

AT3G14750 -----  
 AT1G67170 -----  
 AT1G55170 -----  
 AT5G61920 -----  
 FLX -----  
 SMC3 AATTSWKADIKKKKQEAIEARKVEEESLKEQETLVPQEQAAAREKVAVELKSAMNSEKSQNE

AT3G14750 -----  
 AT1G67170 -----  
 AT1G55170 -----  
 AT5G61920 -----  
 FLX -----  
 SMC3 VLKAVLRAKENNQIEGIYGRMGDLGAIDAKYDVAISTACAGLDYIVVETTSSAQACVELL

AT3G14750 -----  
 AT1G67170 -----  
 AT1G55170 -----  
 AT5G61920 -----  
 FLX -----  
 SMC3 RKGNLGFATFMILEKQTDHIHKLKEKVKTPEDVPRLF DLVVRVKDERMKLAFYAALGNTVV

AT3G14750 -----  
 AT1G67170 -----  
 AT1G55170 -----  
 AT5G61920 -----  
 FLX -----  
 SMC3 AKDLDQATRIAYGGNREFRRVVALDGALFEKSGTMSGGGKARGGRMGTSIRATGVSGEA

AT3G14750 -----MSGNRNRPVPPPSMKGGSYSGLQAPVHQPPFVRGLGGGPVPPPPHPSMID  
 AT1G67170 -----MESKGRIPHSHHMRRLPGPGGCIAHPETFG--NHGAIPPSAAQGVY-  
 AT1G55170 -----MSGRNRIHR---DIRDSYHDHRDLPPERPFLLR--GPPLLQPPPPS----  
 AT5G61920 -----MSSRERIGSNHHSRVSQGMSTSGSSSSR-----HHDTISSTSDPRHLR  
 FLX -----MAGRDRYIPSSAVSTSSSRLLLES-----QLIESDRNR----  
 SMC3 VANAENELSKIVDMLNNIREKVGNAVRQYRAAENEVSGLEMELAKSQREIESLNSEHNYL  
 : . : .

AT3G14750 DSREPQFRVDA---RGLPPQFSILEDRLAAQNQDVQGLLADNQRLAATHVALKQELE-VA  
 AT1G67170 ----PSFN-----MLPPPEVMEQKFVAQHGELOQLAIENQRLGGTHGSLRQELA-AA  
 AT1G55170 -----LLEDLQIQEGERIRQDAEIRRLSDNHGLADDRMVLERELV-AA  
 AT5G61920 -----DHQISLSDILENKIIVQAAEIDRLSNDNRKLASSYVALKEDLT-VA  
 FLX -----ARSVILEDRIAIOHREIQSLLNDNQRLLAVAHIGLKDQLN-VA  
 SMC3 EKQLASLEAASQPKTDEIDRLKELKKIISKEEKEIENLEKGSKQLKDKALELQTNIEENAG  
 : : : : \* . : \* \* . : .





Supplemental Dataset 2:

Sequences used for phylogenetic analysis in Supplemental Figure 9B (FASTA format)

>At-AAR28018

MESDIEILSEADASMRKLRIFGIDDREDENGRRRIKDVEVYVPIVCGSIAFYLGKKATEYRTHKWTVYVRGATNEDLGVV  
IKRVIFHLHPSFNNPTRVVDAPPFALSECWGEFEKIDITVFFHTDVCEKKLELSHVLKLNPNENAYGPIPKSIKIPVVAES  
YNEVVFPDPFESFVARVHNHPAIQISNIPDGLNLPFGAFLF

>At-NP199373

MTNSSSSKKQAQDQPETSEPTLTKSLKTKMKSDEKQKCLKDIEISVPIVYGNVAFWLGKKASEYQSHKWAVYVRGATNED  
ISVVKVQVFLHSSFNSTRVIEEPPFEVSESGWGEFEIAMTLHFHSDVCDKPLSLYHHLKLYPEDESGPLTMKKPVVV  
ESYDEIVFPDPSESFLARVQNHAPALTFPRLPSGYNLPAPMQVEDTGKKKRGDTKDHSLGQWFMSFSEADELLQLAAARQQ  
VQAHIAKLRRQISLLEGQNQTVKTGSDL

>Sc-NP015196

MVATVKRTRIRIKTQQHILPEVPPVENFPVRQWSIEIVLLDDEGKEIPATIFDKVIYHLHPTFANPNRTFTDPPFRIEEQG  
WGGFPLDISVFLLEKAGERKIPHDNLFLQESYEVEHVIQIPLNKPILLTEELAKSGSTEETTANTGTIGKRRTTTNTTAEF  
KAKRAKTGSASTVKGSDLEKLAFLGLTKLNEDDLVGVVQMVTDNKTPEMNVNTNNVEEGEFIIDLYSLPEGLLKSLLWDYVK  
KNTE

>Sc-NP014292

MAPTISKRIKTLVSVRPIIYGNTAKKMGSVKPPNAPAEHTHLWTIFVRGPQNEDISYFIKKVVKLHDTYVNPVRSIEAP  
PFELTETGWGEFDINIKVYFVEEANEKVLNFYHRLRLHPYANPVPNSDNGNEQNTTDHNSKDAEVSSVYFDEIVFNEPNE  
EFFKILMSRPGNLLPSNKTDDCVYSKQLEQEEIDRIEIGIEKVDKEIDELKQKLENLVKQEAINGS

>Sp-NP593114

MTTVKRTVRLITDQNVLPGGEEAVLNDQSFVREWSIKLVCLNPQGEETDASFVDRVTYKHLHPTFQNPTRTIRKPPFQIK  
EQGWGEFEMEIIIIYADKGGHRFLHYLHFQQEYHEDIELNINATRPGLLKALTATGEVPGYSDEGEEARKDKRKNSE  
VGAGKKKAKAKPVDMDKLAEGLQKLQEDDLLQVVQMVNENKTPDMYVRNDIEGGEFHIDLYTLDPNLLLLLLYSFCAKRV  
M

>Os-NP001056732

MPQASSSSSPATAAAPPPQPAADPSPSAVPASEEALDPQTPAPPPQAQPEAVLTAAQKALRSKPTRPPEDSDKKNKLLK  
DVEISFPVIVGTISFWLGKKASEYNCHKWTVYVRSATNEDLSVIVKRVVFLHPSFTNPTRVVEQPPFELSESGWGEFEI  
AITLYFHSDVCEKRLDLFHQLKLYPEEDTGPQSTKKPVVVEYDEIVFPEPTAEFFQRVQNHAPATVPRLPPIGTLPPPG  
PMELVPHEKRGDTKDHPLSQWFSNFSEADELLKLAARQQVQAHIAKLRRQLSMIDGMPQQSKAVSVQGGQFGHG

>Dm-NP609086

MTDFGGDSGGRLKGVTVKPIVYGNIAARFSGKKREEDGHTHQWKVYLKPYFNEDMSIYVKKVHFKLHESYANPNRIVVKP  
PYEITETGWGEFEVIIKIYFNDQSERPVTYHILKLFQSPVVDGELSSSTTMDTKKGLVSESYEEIVFQEPQTQILQHYLL  
LSEQSANGLLTHDTHDFEKKTKTLDNIVNVKQKVKGEIVTLKDKLKLARETISKFKAELAKVQKQPA

>Hs-NP006521

MFKRMAEFGPDSGGRVKGVTVKPIVYGNVARYFGKKREEDGHTHQWTVYVVKPYRNEDMSAYVKKIQFKLHESYGNPLRV  
VTKPPYEITETGWGEFEIIIIKIFFIDPNERPVTLYHLLKLFQSDTNAMLGKKTVVSEFYDEMIQDPTAMMQQLLTSRQ  
LTLGAYKHETEFAELEVKTREKLEAAKKKTSFEIAELKERLKASRETINCLKNEIRKLEEDDQAKDI

Alignment used for phylogenetic analysis in Supplemental Figure 9B

```
Os-NP001056732  MPQASSSSSPATAAAPPPPQPAADPSPSAVPASEEALDPQTPAPPPQAQPEAVLTAAQKA
At-NP199373     MTNSSSSK-----KQAQD-----QPETSEP-----TLKS
At-AAR28018     MESDIEILS-----EADASMR-----KLRI
Dm-NP609086     -----MTD
Hs-NP006521     -----MTD
Sc-NP014292     -----
Sp-NP593114     -----
Sc-NP015196     -----
```

```
Os-NP001056732  LRSKPTRPPEDSDKKNKLLKDVIEISFPIVYGTISFWLG-KKASEY---NSHKWTVYVRS
At-NP199373     LKTKMTK----SDEKQKLLKDIEISVPIVYGNVAFWLG-KKASEY---QSHKWAVYVIRGA
At-AAR28018     FGIDRE----DENGRRRIKDVEVYVPIVCGSIAFYLG-KKATEY---RTHKWTVYVIRGA
Dm-NP609086     FGGDSGG-----RLKGVTVKPIVYGNIAARSFGKKREEDG---HTHQWKVYLKPY
Hs-NP006521     FGGDSGG-----RLKGVTVKPIVYGNIAARSFGKKREEDG---HTHQWKVYLKPY
Sc-NP014292     MAPTISK-----RIKTLVSRPIIYGNTAKKMGSVKPPNAPAEHTHLWTIFVRGP
Sp-NP593114     -MTTVKR-----TVRLITDQNVLPGGAAVLNDQSFVPR---EWSIKLVCLNPQ
Sc-NP015196     MVATVKR-----TIRIKTQQHILP---EVPPVENFPVR---QWSIEIVLLDDE
                :      ::      .      ::
```

```
Os-NP001056732  TNEDLSVIVKRVVFLHPSFTNPTRVVEQPPFELSES GWGEFEI AITLYFHSDVCEKRLD
At-NP199373     TNEDISVVVKKVVFQLHSSFNPNTRVIEEPPFEVSESGWGEFEI AMTLHFHSDVCDKPLS
At-AAR28018     TNEDLGVVIKRVIFHLHPSFNPNTRVVDAPPFALSEC GWGEFKIDITVFFHTDVEKKLE
Dm-NP609086     FNEDMSIYVKKVHFKLHESYANPNRIVVKPPYEITETGWGEFEVI IKIYFN-DQSERPVT
Hs-NP006521     FNEDMSIYVKKVHFKLHESYANPNRIVVKPPYEITETGWGEFEVI IKIYFN-DQSERPVT
Sc-NP014292     QNEDISYFIKKVVFQLHDTYPNPVRSIEAPPFELTETGWGEFDINIKVYFVEEANEKVLN
Sp-NP593114     GEETDASFVDRVTYKLLHPTFQNPTRTIRKPPFQIKEQGWGEFEMEII IYYADKGGEH--R
Sc-NP015196     KKEIPATIFDKVIYHLHPTFANPNRTFTDPPFRIEEQGWGGFPLDISVFLLEKAGER--K
                :* . .:* ::* : : * * . ** : : * *** * : : . . : :
```

```
Os-NP001056732  LFHQKLKLYPE-----EDTGPQ--STKKPVVVEYTYDEIVFPEPTAEFFQRVQNH
At-NP199373     LYHHLKLYPE-----DESGPL--TMKKPVVVESYTYDEIVFPDPSESFLARVQNH
At-AAR28018     LSHVLKLNPE-----NAYGPIPKSIKIPVVAESYNEVVFPDPFESFVARVHNHP
Dm-NP609086     CYHILKLFQSP-----VVDGELSSSTTMDTKKGLVSESYEEIVFQEPTQILQHYLLLSE
Hs-NP006521     CYHILKLFQSP-----VVDGELSSSTTMDTKKGLVSESYEEIVFQEPTQILQHYLLLSE
Sc-NP014292     FYHRLRLHPYANPVPNSDNGNEQNTTDHNSKDAEVSSVYFDEIVFNEPNEEFFKILMSRP
Sp-NP593114     FLHYLHFQQEH-----YHEDIELNINATRPGLLKALTATGEVPGYSDEGEEARKDK
Sc-NP015196     IPHDLNLFQES-----YEVEHVIQIPLNKPLLTEELAKSGSTEETTANTGTIGKRR
                * * . :
```

```
Os-NP001056732  AATVPRLPPGITLPPPG-----PMELVPHEKKRGDTKDHPLSQWFSNFSEA-DELLKL
At-NP199373     ALTFPRLPSGYNLPAPM-----QVEDTGK-KKRGDTKDHSLGQWFMSFSEA-DELLQL
At-AAR28018     AIQISNIPDGLNLPAPM-----AFLF-----
Dm-NP609086     QSANGLLTHDTHDFEKK-----TKTLDNIVNVKQKVKG-----EIVTL
Hs-NP006521     QSANGLLTHDTHDFEKK-----TKTLDNIVNVKQKVKG-----EIVTL
Sc-NP014292     G---NLLPSNKTDDCVY-----SKQLEQE-----EIDRI
Sp-NP593114     RKNSEVVGAGKKKAKAK-----PVDMDKLAEGLQKLQEDDLLQVVQMVNENKTPDMYV
Sc-NP015196     TTTNTTAEPAKAKRAKTGSASTVKGSDLEKLAFLGLTKLNEDDLVGVVQMVTDNKTPEMNV
```

```
Os-NP001056732  AAARQQVQAHI AKLRRQLSMIDGMPQQSKAVSVQGGQFGHG
At-NP199373     AAARQQVQAHI AKLRRQISLLEGQNQTVKTGSDL-----
At-AAR28018     -----
Dm-NP609086     KDKLKLARETISKFKAE LAKVQKQPA-----
```

```
Hs-NP006521      KDKLKLARETISKFKAELAKVQKQPA-----  
Sc-NP014292      EIGIEKVDKEIDELKQKLENLVKQEAINGS-----  
Sp-NP593114      RNDIEGGEFHIDLYTLPDNLLLLLLYSFCAKRVTM-----  
Sc-NP015196      TNNVEEGEFIIDLYSLPEGLLKSLWDYVKKNTE-----
```

## Supplemental Dataset 3:

Sequences used for phylogenetic analysis in Supplemental Figure 11A (FASTA format)

## &gt;At-FRIGIDA

MSNYPPTVAAQPTTTANPLLQRHQSEQRRRELPKIVETESTSMDITIGQSKQPQFLKSIDELAAFSVAVETFKRQFDDLQ  
KHIESIENAIIDSKLESNGVLAARNNNFHQPMLSPPRNNVSVETTIVTVSQPSQEIVPETSNNKPEGGRMCELMCSKGLRKY  
IYANISDQAKLMEEI PSALKLAKEPAKFVLDICIGKFYLGRRRAFTKESPMSSARQVSLIILESFLLMPDRGKGVKIESW  
IKDEAETA AVAWRKRLMTEGGLAAA EKMDARGLLLL VACFGVPSNFRSTDL LDIRMSG SNEIAGALKRSQFLVPMVSGI  
VESSIKRGMHIEALEM VYTFGMEDKFS AALVLT SFLKMSKESFERAKRKAQSPLAFKEAATKQLAVLSSVMQCMETHKLD  
PAKELPGWQIKEQIVSLEKDTLQLDKEMEEKARSLMEEAALAKRMYNQI KRPRLSPMEMPPVTSSSYSPIYRDRSFP  
SQRDDDQDEI SALVSSYLGPSTSFPHRSRRSPEYMVPLPHGGLGRSVYAYEHLAPNSYSPGHGHRHLRQYSPSLVHGQRH  
PLQYSPPIHGQQQLPYGIQRVYRHSPEERYLGLSNQRS PRSNSSLDPK

## &gt;At-FRL1

MTASETIATAINQIDEKKEKLLKAFDDLQAHRSLLSPSFLSWSEIDSHFSSLQSSLASRFRLHSTSPLEHDSYRIDAS  
DAGKSSSSEEVSEQPVVEPELRLALCEKIDGIGLIKYLIRIWDDETPLNQEVSAAIRYSPDTASMVLD AIEGSNYTPSSSG  
RSFDVRRVFLVLLMEVLIEINANITVDTRNRKAKLAYHWKSKVGVKPFALVFLHLVAAFELGSEFDTEELSDYVFMIAKY  
KQATLVCNKIGVDRKRVGKLIKTL LDSGKPI LAVKFM YECGMTDEFEP I PVLSYIKDCREAA LRVCVEDNYSLKSQNEA  
SDKEVSALKPLIKI IKDQNLSEFTQEKVEERVEELEKNKALRKRNTTNP PKQEPQ QKGGKRTRDCKNGS QVPVPSQQLL  
SRPEALLMPEHSHHGLQLNPYGLMTSAFSGVVVNPLTGLFGSGATPQSLYYAQQTGYVLP P QYHPPYYSQ

## &gt;At-FRL2

MTAAESIAASINQIDEKKQKLLKAFDDLQAHRSLLSPSFLNSWSEIDSHFSSLQSSLFNRLQSAVTSSNSGNIETPTAVT  
TETPVLPPELRFKCEKNDGKGLGNYMIENSRKRLSINEELPNAIRCSENAPLVLDAIEGSYHCSSPSSSSSARAIDVKR  
IFVLLLEALIEINANLTNDLRERARTIAYDWKPNIGNKPSALGFLHLVAAFELGSLFSTEEICDYIFLISKYKQATTIC  
KKIGLDRNRIGVLVQKFLDTGRLLVAIRFIYENEMVGEFEPVSIKTS LKNSREAAKRVCAEGNYS LKVQNEATDKELSA  
LRAVIKVVKEKNIESEFMEEKLEECVKELEDQKAQRKRATKFNSPANPQQPQE QKVDNKRPRVANGSSMEYNLTIPPLRP  
QQQPPLLP TSPSILQVNPYGLLSSILPGVAVPYGNPRALFGSVPAPASRPVFYVQQTGYGMPPPQYRPPYYPQ

## &gt;Aa-AAZ92551

MANYPPTVAAQSSTAAIPLLHQSERRRGELPAVVETESTAMEISIGQSKQPQFLKSIDELAAFSVAVEAFKRQFDDLQKH  
IDSIENAIESKLSNGADLAASSNFHQPLLSPPRNNASVETTIVSVSQSSQEP AETVPETSNNKTEGERLCEL MCSKGLRKY  
IYANISDRAKLMEEI PSALKLAKEPAKFVLEICIGKFYLGRRRAFTKESPMVSARQVSLIILESFLLMPDRGKGVKIESC  
IKDEAETA AVAWRKRLMSEGGGLAAA EKMDARGLLLL VACFGVPSNFRSMDLLDLIRMSG SNEIAGALKRSPFLVPMISGI  
VESSIKRGMHIEALEM VYTFGMEDKFS ASSVLT SFLRMSKESFERAKRKAQSPLAFKEAAAKQLAALSSVMQCMETHKLD  
PVKELPGWQIKEQIVNLEKDTLQLDKEMEEKARSI SLMEEAVLAKRMYNQMKRPRLSPMEMPPVASSYSPLYLDRSFP  
SQRDEDRDEI SALVSSYLGPSSSFPHRSSLRSP EYMVPLPPGGLGRSVYAYEHLPPNSYSPGHGQRLPRQYSPSPVHGQ  
RHPRQYSPPIHGQQQIPFGLQRVYRHSPEERYLGLSNHRS PRSNSSLDPK

## &gt;Al-ABY51872

MANYPPTVAAQSSTAAIPLLHQSERRRGELPAVVETESTAMEISIGQSKQPQFLKSIDELAAFSVAVEAFKRQFDDL  
QKHIESIENAIIDSKLKSNGAYLAASSNFHQPLLSPPRNNASVETTIVSLSQSSQEP AETVPETSNNKTEGERLCEL MCSKGL  
RKYIYANISDRAKLMEEI PSALKLAKEPAKFVLDICIGKFYLGRRRAFTKESPMVSARQVSLIILESFLLMPDRGKGVKIE  
ESC IKDEAETA AVAWRKRLMSEGGGLAAA EKMDARGLLLL VACFGVPSNFRSMDLLDLIRMSG SNEIAGALKRSPFLVPMI  
SGIVESSIKRGMHIEALEM VYTFGMEDKFS ASSVLT SFLRMSKESFERTKRKAQSPLAFKEAAAKQLAALSSVMRCMETH  
KLDPAKELPGWQIKEQIVNLEKDTLQLDKEMEEKARSI SLMEEAVLAKRIYNQMKRPRLSPMEMPPVASSYSIYLDR  
SFHSQRDEDRDEI SALVSSYLGPSSSFPHRSSLRSP EYIVPLPPGGLGRSVYAYEHLPPNSYSPGHGQRLPRQYSPSPV  
HGQRHPRQYSPPIHGQQQIPFGLQRVYRHSPEERYLGLSNHRS PRSNSSLDPK

## &gt;Th- AAY90142

MIPARGYSHHPSTTEEKPSPATIPRLHQRDQSERRGDFPAINRTEPTNKEITSGDSKHPQFMKSIDDLAKFSAAFDAF  
KRHYDDLQKHMDDIENAIESKFKSNGVDDSSSHSPEHDASREIATAIVCPPPEEAETAPEMITSNDKAEGQRLCESMCS  
KGLRKYIYANISERAKLMEEI PAGLKLAKPAKFVLEICIGKFYLGRRKAFSHDSHMI PARQVSLIILECFLLMIEPGEEK  
VKSMIESSVKEEAEEAAFAWKRRIMNEGKLATAEAIDARGLLLL IACFGVPSFRSMDLLDLIRQSGTSEIAGALKRSPF  
LVPIVSGIVDSCLKRGTNIEALEIVFTFGMEDKISPSLLTPFLRKSKESEFELAKRKAHSPTAFKEAIEKQLAALLSVTK

CLEAHKLDPAKEIPGWPIKEQIVKLEKDTLQIDKQMEEQARSISLMEEAVLTKRLYNQMKRPRLSEMEMPAAASSSYSP  
IYDRNFSSSHIDGDRDEISALVSSYLGPSSSFPHRSSLRSPPEYMVPPGGLGRSVSAYEHLLPSSYSPVHGQRLPREYSP  
PVHGQQQIPYGLQRVYRHSVERLLTLPHHRSPRNSQDHIGGM

>Vv-XP002283789

MAKTSMTLTVKEGQPPPLCAAASVSGESGGGDPMRSVNELRNLSTVLHAFRRRWDELQKHLDFIQDAIASRSRELDASPO  
HHQALASNTLETSSPESADLHSEMPAQTSVSELGFLCGMMRSRGLRKYIISHLSDVAKLREEVPAALKGAPKPAKLVLE  
CIGRFFLQGSKAFGKATHMVPSRQASLLILEFFLLSDCTEMEPSVKEEADLAAVTWRKRLINEGGVSNASDIDARGLLLL  
VASFGIPALFRNEDLRNLIIRLSCPKEISDALRRSRFLLARVPDVIQGMIKNQMNVEAVDFAYTFGLEEKFPWKILTSFL  
REHKEEWKRTREEDSPIRLKKANENYLSAMKSVTRCLEDRVDPKLLSGWHIDEKIQLEKEMADLDKKMEGKVMKLRK  
ADEIDSLKMKMTREIKHSPIAAPSSVIGLQEQRVADNMASSRSFYDSTMPINFLDSGFPGHISTYPAASAMLHSGGGSLP  
ENITGTMSGSGSTRVHGTGTGPGMAGTGGVPSMASFSGAHGEMLFDRTGQMMKNNGPPYAGRRDMGFNDRVIGQSFIAH  
PASMGVDSIFGPSTSMESFPGMPNAPSINAANGSSASDLYQFADAVFGR

>Vv-XP002276345

MAELKTISAALKLIDAKKESLRKAFEDLEAHSSSLSSFTLTWSAIDAHFSSIQSSLSRQFEILESRTDSVPQNDTLPTNN  
AVSLPAQSNVSLPQNNVSLPQNNVSLPQNSAISRPQNSAVSRPPQNNANPSHPQLRLLCSAMDAEALRRYIMD  
HPNDRETLRSELLDAFQVARDPAKMVLDALTGFFPSNANEDGSSELHTMRRSCVFMLEQLMLFSPEIGEDVRQRAKSLAQ  
EWKGVKVGDNLTLPKMGFLHLLAAYGLGSDYDSTELLELLIDVVRYREVFLGCRGLNLVDKVPDLIQNLIGSGKPNLAVK  
FVLEFKLTHKFPLIAIKDIVESSRDVARKVRKDGKHSLSQNEATSKEISALKLVTKYIKDYDLNNEYPGAPLEERIQK  
LESQMAARTAACKRPPALAPAPRPKQKQKQKQAQTTATASPSVPSGAAGTSSTAAPFQQPHLQAPGLVPDGPVPMNPS  
AGLYGFAGVPMGFPGNLGPPMPLHPMEPQLPMPFAHGGYGLQSLYPAYFHQ

>Vv-XP002276317

MATVKTIALGLTLIDEKKEELRIAFEDLQAHSSSPSSFTLTWSDIDSHFSSIQSSLTRQFDLIQCQNDVVPEILQKYVPP  
SHPRLKLLCSNMDANGLTRYIIDHSKDRQEIASELPDAFRVAVPAPKLVLDALQEFFPPNEVDNEGKLGSLMQTRLLLL  
EQLTAVLPEIKADVMQRAKYLAQEWKGINRGAVTNSNGFLGFLYLLAAYGMGSDSDFDSSEYVEFLANVVVQNRQQGFTLCC  
RLNCVDKVPGVYLRKLCVSSAMWACVAKEALYLCQIGLTDKCLAPILKAHVKKFENLAQNVYDSRNQSLQYLNATGA  
EITILKQIISCLEEYKLEAEYPREHLEMRIKMLEREMKDRKRSAAALVPRHQQQQELGSKHPWTKPAGAAVPSVAGFLPD  
RSVPYLSSSVELQGLAGPTLSTARYTAPSAGLYCSAGVPMSPGNLSPARPHVQALDSQMPIPSGYFDRPSGLGGYNLQP  
HYHWTYYPSSS

>Rc-EEF51656

MATPPLFSVKQEPDHQSPLPLIPLPQPYVKGEPEELPIVTIQQQEPQFLQSIEELNTLSSAINEFYRRFSELQNHLDIFI  
HTSIKQHEEQQQIQDAPTPTITPTIVTDNQTITDAKKETVINSAPPAKSSSSSELSLCEMMCGRGLRKYLTSNLTN  
IPKLRNEVPTALKYAPKPAKLVFDCFGGFYLGSRAYTKDSPMVPGRKASILVLELFLILLDDGIQFDSDLRQEAQAAA  
AWRKRLLIAEGGVSKACEIDARGLLLFVGCFCGIPKVFTSGDIWDLIRSSNLQQISDALKRSHVLVTKVSDILERMNNGMK  
IEAIDVAYTFGIEDKFPQKLLTSFLRDSKEALKRRRREANNSPVLLKEASQKHLSTLKSAMKFLEGRKLDPKLLPGWQ  
VTEKIDKLEKEIADLNRKIDDKVAPKRKADENEFSINLKSQEVKRLRFTGSPLISSPSFGLHEQRVPSHLDGNGSYNAST  
RINMVDGGFSCLISNPPVAGSMLYGSGSYSAAYGVPSTSSFAGVYRETLADRTGNITGSNVSAFGWHGVGDASIIDGTRG  
QSLVHQSGSGLFGPSIEGFAGLPNSSPAGAAQSSASDLYRFADAVK

>Rc-EEF33358

MSSSNSTQMTTLKTIESALNLIIDIKQTLKRAYDDLQSHSSLLSFSLSWSDLDSHFTSVQ TALTRRFLRLQSTRPGPET  
VQPEPVQDNPTRKALVPFCEKMDGRGLRDIYSEHSREREAIRAELVGLMGLVSDPGEMILDAMEGFYLSKSKGDRDLDY  
RLRKSCLDLLEVLSEIKPKPKFSDEVKIKAKNLAFEWKEKVS LN GDSPSEALGFNLIVAFELKDMFDDVNELLNYFVVI  
ARFKQATVLARDIGLGDKINDLVQKLIDSGKQLLAVKFI FEFGLTDKFFQAPLLRDHLKESKEFTDKVCKEEKNSVKAQN  
EARSREVNALKSVLRYIDEHNLEFDYPHLDLEKRIEMLEKQKADRKVAAPS PDNRPRQQPKKQQLSKKQQHQGKQAKK  
QQLKGNKRPRMAMLPGPAAVPIS IAGPSSAGASAGPYGLAGAGMCFPGNPSPVRAHPYSSNSHMSSSYDRSAAFGGYGF  
PPQYCPGYYPQ

>Pt-XP002320559

MEDSESVATLMDSTTSKIHQLQKAFAELESHRAVTLNLKWELEEHFHGLERSLKRRFHELEDQEKQYETKTRRAREILE  
KREAAVVAKEQDSLEKLEKRDAAIFSI SNALQKHKRVSSVEPAVVSYDDQFGSPAIDDQPPEAMTAESNLGEIIDPSEN  
GNLEYPQLVELCEQMDSEGLHKFISDNRNKLAVLKEEIPALAKAAANPAQFVLNSLEDFYPKEVSNVDGKKDSTLLGVRR  
TCIMLMECLSILLMYADLVSVSDVISEDVKDQAKAIAEWEKPRLDLSDVDANNGNSLEAHAFLLQLLATFGIASDFDEEEL  
SRLIPMVSRRRQAELCRFLGLSEKMPGVIEVLVNSGRQIDAVNLAFADFTEQFSPTLLKSYLKEARKVSSSFKPGNA

SPITGQNEVNERELAALKAVIKCIEEHKLEEQYPGDPLQKRLQLQEKAKAEKKRATEAAKPQPKRPRASGVGCGPRVTSS  
VPERTFYPRVPERYPQYVYDRPYIYTGADNHPVQLMSSAATYNFSPSHGNYFGNGYQYQTPYHH

>Ca-ABK42079

MEDAQSVAMLMSTTSKIQQQLKKAFAELESRAVTLNLKWKQLEEHFHGLEKSLKRRFTELEEQEKEFENKIVQSKTILE  
NRQAAVISKEQSSLSLQKRDAAVSAITVAMEKHKKPNCVEPAGTTHEVQGESMFEAKPLDFIPLANTEDNMKSFKND  
VVEVKLYPELIKLCQDMQDSEGLHKFISDNRNLAAREEIPALRTAVDPADLVLDLQKGFYFSEVLISSDAKKDANLLGL  
RRTCIMLMECLSVLLTTLELDSISSLISESVKGRAKAIKAWKPKLDELEIDANNNGNSLEAHAFLLQLLATFSINSNFNQE  
KLYKLI PMVSRRRQTADLCRSLGLSDSMPGVIDVLI SNGRHI DAVNLAF AFELTEQFPVSVLLKSYLNDASKASTPLNSG  
NASPTVQNEVNEKELSALKAVLKCI EDHKLEEQYPVDPLQKRVLQLEKAKADKKKANEVAKPQSKRPRPNGVGNPVRVNN  
VVAEKNF

>Sb-XP002466091

MPPPPPPASTAASRAAMLHSVNTLASFSDTLADFLDQWDSVVLDVASIAATFAVLFPGPSNPKPYLPAPAPEVRRERE  
TPAPQPEREPEPTLAPQPEPGPNAAPAPEPEPEPQWEREPSPLPEPQSSPLPEPAPALQPRPAPESAPAPQPEPAPNPD  
ERQDGAGDAYAAELEHRCQMMNCRGVRRFVTAQVRDGGVEWLRQVGPALRRAPDPAALVLRIGRYIRAESPVEAAC  
TLLLELYVRAGCPRLPWGQGRDAELLLRQEAAREVALTWRSRLLRSGGGVGNAPGAAGARGLAFFMAAFGVPVEFPAQEL  
CDLVNAADVAACVEVLKASKLFVRKMRDVVIEMINKAMYLQAMRIILAFEFQEAFLPLPTLALIEKLEHDTKDENEQA  
SERDEEDLALLSSISKMEDHKLSPSEFTSFAAKIALLEERVGKPKQACTGVKRKRAEECVG

>Sb-XP002457174

MPDMESVAALMDSTSSKIQQQLQEAFAELESQSAVSMNLKWKQLEDHFRGLEQSLKKKFDELKEQEEEFQEI VAKSDLMLE  
QREAAVAKELTSLERLQEKRDAAALAMIFSKSRLSLPVPAINPMNKALDNLGVKWKPKPASEESVHLQDGNAAVRPRSELA  
SLCEEMNVKGLHKFISDNRNLAAREEIPALKKTSDPYGLVLDLSEDFYSGDNLVLDGKKDGDLLGVRRTCLMLMESL  
GQLQTNITCFSLEGHMLTTNIVERAKKIAFEWKSCLDNLIDASNGNACLEAHAFLLQLLATFGISAEYNEDDLCKLLPYV  
SRRRQTPELCRLLGLSQKMPGVI EVLVESGRPIDAINLAYVFELTEQFEPVQLLKAYLRDVKKVSHARNVKGSPGAQNE  
NERELSALKSVIKCIEEHKLEEQYPVDPLQKRVLQLEKAKADKRRAVEAAKPQSKRPRANGSAFAHRATGFADKSFYPA  
ATPERHPSNPHYERQFVYGAEAHLPMPVSSASYTMQPAHGPPYNGYVQYQVPIH

>Ps-ABK24390

MDAEASKKERLHKAFLELQSHSSALVNI TVQWKELEDEFNELEKLI RFEELGPKGTENEKEKKSAAEKSTGNPKNTSEKK  
SVAEKSIGNPNKTS PALKDDVKPCPQLKSLCEKMDGEGKQFLADSPSDFR VIRNEVSAALRCAADPAKLVLQALKGFYF  
ACNYRELPI DLVTQRYACNLLLECLPFVLS PDEVSSEAKKDAQKIAASWKSCLNLDAESRIKFVEAHAFLLQLLASYGISK  
EFKDDDLCELVPSIYRHPETPELCRALQISHKIPDVVEKLSSSGKQIGAIQFIYAFGLVEKFPPVPLLKAYLEDEKRVSQ  
ELAQQGGYPVNAQNYAAKREIASLNTVIKCI EDYKLESQMSIKDLQKRVGEVQKSMKRKRNAKSIKFLTKQARLYSGAG  
VVAGAGAASVAGAGVASVAGAASVAGAVGLLPKPSPPSAFALFNSSALLPKPTPPSAFALSNSDLYRPAPVASIPSYNL  
PGQGVYDRGSQSIYRSACDVGSNPSFLSRSHLYPSDSVQ

>Os-NP001060162

MATEDTSHISGSSESTIPLLEQLAEVFGKLSHTTETSLQLQNGINWEDIKAHFLNLEKSYKSKCDELAEKQKALEEKKAE  
SCRLIAEKEANVSAKERAFNLQFQELRDTAVSALSEVRQKYKVELAGILDANGSKDKKVRTSTNDMNALCASEENTTASG  
LGEPSEASPVVDKPRPVKQLCEQMDTAGLLKFLSENWKKLSSLRDELSAALRCATDPAFVLSLEGFFPSDHTSSPGN  
KQIILQGQRRSCII LMEAITPALATKEPGDNHPWSSEIRELAKAIAEEWKSCLA EVDLDASDGYSLEAQAFLLQLLTTFNV  
DSVLDEDELCKLVVAVSRRKQTAELCRSLCLNERIPDI IKELVNRHRQIDAVQFIHAFGLSESFPPAPLLKTYVEELKDS  
LGNGDGNAAASLKDDPKTRELALRAVIKCI EYKQLQKDYPLGPLQKRVAEKSKGKRPLEAGRHNKKPRTFGNSAAR  
RPPNPVGSAGRRPSGPAGTWQRPPPPMPSYPDRYGHADRYHYTAPSATYDPPAYASYSEPYASASKPYQYTPGSVAPASYN  
SNQFKVAYGGPGAPPTAGGYGSYNDAAGQSTSSSYSGYSGYHPSLPRL

>Os-NP001062667

MSDMESMATLMESTGSKLQQLQRAFAELESQSAVSLNLKWKQLEDHFRGLEQSLKKKFDDLKRQEEEFEEETVAKSEQMLE  
QQEAVVAKELTSLKQLQKRDAAALAVIFGKSKLNLSTPLINPISKSVNNNAVFNGNIGGSLSVKWKPKATAHGAYLQDE  
NTAVKPRSQLVVLCEEMNVNGLHKFISDNRKDLTSIREEIPVALRGATDPYGLVLSLEDFYFGDNLILDGKKDGNLLGV  
RRTCLMLMESLAQLQTDATTGFI SEGQVLTASIKERAKKIALEWKSCLDLDLDFDASNGNACLEAHAFLLQLLATFGIFAEFA  
QDELCKLLPSVSRRRQTPELCRILGLSQNMPGVI GVLVENGRTIDA INLAYAFELTNQFEPVELLKAYLQEVKSVPHFKT  
GKISLQVQNEVNERELSALKAAIKCIEEHKLDEKYPIDLLQKRVIQLEKAKADKRRAVEAAKPQSKRPRANGSVYAPHTS  
FPDKSFYQAAPPQRHSYPYERQYVYGAEAAHHPTMISSAPYGISPAHTTYEYKDGEPNRG

>Os-NP001062668

MSDMESMTALMESTGSKLQLLQRAFAELESQSAVSLNLKWKQLEDHFHGLEQSLKKKFDELKEQEKEFKETVTKSEQMLE  
 QQEAAVVAKELTSLEKRLQQRDAALAMIFGKSKLNL SMPVINPI SKSVSNNAVLNGNIASLWPKPATAHGAYLQDGN TAV  
 KPRSQLVILCEEMNVNGLHKFISDNRKDLTSIREEIPVALRGATDPYGLV LASLEDFYFGDNLILDGKKDGNLLGVRRTC  
 LMLMESLAQLQTDATTGFISKGQMLTASIKERAKKIALEWKS KLD SLD F DASNGN CLEAHAF LQLLATFAIFSEFAEDEL  
 CKLLPSVSRRRQTPELCRILGLSQNM PGVIGVLIENGRTIDAINLAYAFELTDQFEPVELLKAYLKEVKSM SHVKTGKMS  
 PGVQNEINERELSALKAVIKCIEEHKLEDEKYPIDPLQRRVIQLEKAKADKRRAVEAGKPQSKRPRANGSVYAPHITSFSD  
 KSFYQAAAPQRHSYPYERQYVYGAEAAHHPTMISSAPYGMSPAHTTYYGNGYQVQYQVPYIH

>Zm-NP001141761

MSTEATLNNSGGSESALLLLEQLAEVFGKLTHTTETFLHLQNGIKWEDI EGHFSLDESYSRKFDELVEKEKALEEKAE  
 ACRLIAEKEAKVSTKEHASLNQLQELRDAAVSSLAEVRQKYKVELAEILEASGSKDKKVSTSINDNNASRASEENTPASG  
 SGEASEALPVETKPRPV LKQLCEQMDTKGLLKFLSENCRKLASFRDELSVALKCATD PARFVLNSLEGFFPPDQTN SPGS  
 KHNALEVQRKSCILLMEAIAPALGMKEPGGDDPWSSEIKEQAKEIAEEWKS KLA EIDL DASN GYSLEAQAF LQLLTTFNV  
 DSVLDEDELCKIVVAVSRRKQTAVSCRSLG LNEKVP GIEEELV KRHRQIDAVHFIQAFGLSETFP PAPP LKTYVEEQKDT  
 IENNGDATAISLTD DPKSRELIALRAVIK CIEEHKLEKECSL GPLQKR VSELKPKG EKRPSSDAGRTYAKKPRGPGISFP  
 RRPAGSVGSAARRPFPFGYTWRAPAPMPSRGPAPVPSRAPLPA PLPDRYGAADRYHYTPPAPAYDSGAFSSYSEPF SAP  
 KPFQYTPGSVAASYNSSPYKVAYGGPGAPVRSTYPGYASASGPAASSSYANYMGSVYRPPQQP

>Zm-NP001151902

MSDMESVAALMNSTSSKIQQLEAFAELESQSTVSMNLKWKQLEDHFHGLEQSLKKKFDELKEQEKEFQETVAKSEQILE  
 QREAAVVAKELTSLEKLEKREAAALAMIFSKSRLSLPVPTINPMNKALNNLGVKWPKPASEESVHLQVDNAVVT PRSELV  
 ALCEEMNVKGLHKFISDNRKNLAAIREEIP SALKKTSHPYGLVLD SLEDFYSGDNLVLDGKKDGDLLGVRRTCLMLLES L  
 GQLHTAGITCFSLEGHMLTTNI IERAKKIAFEWKS KLDNLEIDASN GNCLEAHAF LQLLATFGISA EYNEDDLCKLLPYV  
 SRRRQTPELCRLLGLSQKMPGVIEVLVKSGRTIDAINLAYVFELTEQFE PVQLLKAYLRDVKKLSHARNVKISPQAQNE M  
 NERELCALKSVIKCI EDHKLEEQYPVDPLQKRVLQLEKAKADKRRAVEAAK PQSKRPRANGSTFAPRATGFADKSFYPAT  
 PERHPSNPYERQFVYGAEAHLPPMMSSASYPMQPAHGPPYNGYQVQYQVPYIH

>Pp-XP001752883

MADLEIQRAAIVNCTLEWKEFEDYFTELEAVMQKRLEDLVAKEKAFEIKYQEMQKALDNREEAVSSREQAMLSRVQE QKD  
 SAIASLFEEKRNTTTAALLTSNTVSPSPTTTSPTSNGLTPTPAPTALGAEVRVRPELKVLC EIMDGDGLRKYIVNHKKDV  
 GALRNELPSALQCAIDPARMVLGTLEGYHLPEPTSVAKDKESGASANRRACILLLECLAVVLADPVLGADHPVVP SNVKE  
 SAKQVADQWKS RMNLQGD TAGNSLDAQAF LQLVATFGIATEYNDDELCKLV TAVARRRQT PALCRSLGLTAKIPD VVDR L  
 AKEGKQIEALSFAHSFGIMDRVLP IPLLKAYLKEARRTAQSILKSGSSSAAAQNDATMKELAAALKAVLKCIEEYQLESQY  
 PSMPLQKRVLHLEKAKSDRKRAAVAVKAQTKRPRAS



Alignment used for phylogenetic analysis in Supplemental Figure 11A

Aa-AAZ92551 -----MANYPPTVAAQSST-AAIPLLHQ---SERRRGELPAVVETESTAMEISIGQSK  
 Al-ABY51872 -----MANYPPTVAAQSST-AAIPLLHQRHQSERRRGELPAVVETESTAMEISIGQSK  
 At-FRIGIDA -----MSNYPPTVAAQPTT-TANPLLQR-HQSEQRRRELPKIVETESTSMDITIGQSK  
 Th-AAY90142 MIPARGYSHHYPTSTTEEKPS SPATIPRLHQRDQSERR-GDFPAINRTEPTNKEITSGDSK  
 Vv-XP002283789 -----MAKTSMTLTVKE--GQPPP---PLCAA AVSGE-----SGGG  
 Rc-EEF51656 -----MATPPLFSVKQEPD HQSPLPLIPLPQPYVKGE PV EELPIVTIQQQ  
 Pt-XP002320559 -----MEDSESVATLMDSTTSKIHQLQKAF AELESHR---AVTLN  
 Ca-ABK42079 -----MEDAQSVAMLMDSTTSKIQQLKKAFAELES HR---AVTLN  
 Sb-XP002457174 -----MPDMESVAALMDSTSSKIQQLQEAFAELESQS---AVSMN  
 Zm-NP001151902 -----MSDMESVAALMNSTSSKIQQLQEAFAELESQS---TVSMN  
 Os-NP001062667 -----MSDMESMATLMESTGSKLQQLQRAFAELESQS---AVSLN  
 Os-NP001062668 -----MSDMESMTALMESTGSKLQQLQRAFAELESQS---AVSLN  
 Os-NP001060162 -----MATEDTSHISGSSESTIPLLEQLAEVFGK LK SHT---ETSLQ  
 Zm-NP001141761 -----MSTEATLNNSGGSESALLLLEQLAEVFGK LK THT---ETFLH  
 Pp-XP001752883 -----MADLEIQR---AAIVN  
 Ps-ABK24390 -----MDAEASKKERLHKAFLELQSHS---SALVN  
 At-FRL1 -----MTASET IATAINQ IDEKKEK LK KAFDDLQAHRSL LSPSFS  
 At-FRL2 -----MTAAES IAASINQ IDEKKQKLK KAFDDLQAHRSL LSPS FN  
 Rc-EEF33358 -----MSSSNSTQMTTLKTI ESALN LIDIKKQTLKRAYDDLQSHS LLS---SFS  
 Vv-XP002276345 -----MAELKTI SAALKLIDAKKESLRKAFEDLEAHSS SLS---SFT  
 Vv-XP002276317 -----MATVKTIALGLTLIDEKKEELRIAFEDLQAHS SPS---SFT  
 Sb-XP002466091 -----MPPPPPPASTAASRAAMLHSVNTLASFS DTLADFLDQWDSVVL DVASIAATFA

Aa-AAZ92551 QPQFLKSIDELA AFSVAVEAFKRQFDDLQKHIDSIENAIESK LKSN GADLAASSN-FHQ P  
 Al-ABY51872 QPQFLKSIDELA AFSVAVEAFKRQFDDLQKHIESIENAI DSKLKSNGAYLAASSN-FHQ P  
 At-FRIGIDA QPQFLKSIDELA AFSVAVETFKRQFDDLQKHIESIENAI DSKLESNGV VLAARNNNFHQP  
 Th-AAY90142 HPQFMKSIDDLAKFSAAFDAFKRHYDDLQKHMDDIENAI ESKFKSN GVDSSSHS-----  
 Vv-XP002283789 DP--MRSVNELRNLSTVLHAFRRRWDELQKHLDFIQDAIASRSRELDAS PQHHQA-----  
 Rc-EEF51656 EPQFLQSIEELNLTSSAINEFYRRFSELQNHLDIFIHTSIKQHEEQQQIQDAPTPT-----  
 Pt-XP002320559 LK---WKELEE HFGHLERSLKR RFHELEDQEKQYETKTRRAREILEKREAAVVAKEQDS  
 Ca-ABK42079 LK---WKQLEEHF HGLEKSLKR RFTELEEQEKEFENKIVQSKTILENRQA AVISKEQSS  
 Sb-XP002457174 LK---WKQLEDHFRG LEQSLKKKFDELKEQE EEFQEI VAKS DLMLEQREAAVVAKE L TS  
 Zm-NP001151902 LK---WKQLEDHFRG LEQSLKKKFDELKEQE EEFQETVAKSEQILEQREAAVVAKE L TS  
 Os-NP001062667 LK---WKQLEDHFRG LEQSLKKKFDDLKRQE EEFEEETVAKSEQM LEQQA AVVVAKE L TS  
 Os-NP001062668 LK---WKQLEDHFRG LEQSLKKKFDELKEQE EEFKETVTKSEQM LEQQA AVVVAKE L TS  
 Os-NP001060162 LQNGINWEDIKAHFLNLEKSYKSKCDELA EKQKALEEKKAESCRLIAEKEANVSAKERAF  
 Zm-NP001141761 LQNGIKWEDIEGHFLSLDESYSKFDLVEKEKALEEKKA EACRLIAEKEAKVSTKEHAS  
 Pp-XP001752883 CT--LEWKEFEDYFTELEAVMQRLEDLVAKEKAF EIKYQEMQKALDNREEAVSSREQAM  
 Ps-ABK24390 IT--VQWKELEDEFNELEKLIR--FEELGPKGTENE-----KEKKSAAEKSTGN  
 At-FRL1 LS---WSEIDSHFSSLQSSLASRFRL LHSTSPLEHDS-----  
 At-FRL2 LS---WSEIDSHFSSLQSSLFNRLQSAVTSS-----  
 Rc-EEF33358 LS---WSDLDSHF TSVQTALTRRFLRLQSTR-----  
 Vv-XP002276345 LT---WSAIDAHFSSIQSSLSRQFEILESRTDSVPQNDTLPTNNAVSLPAQSN AVSLPP  
 Vv-XP002276317 LT---WSDIDSHFSSIQSSLTRQFDLIQCQNDVVP-----  
 Sb-XP002466091 VLFPGPGSNPKPYLPAPAPEPVRE REPTPAPQPEREPEPTLAPQPEPGPNAAPAPEPEPE

:

Aa-AAZ92551 LLSPPRNNASVETT VSVS-----QSS  
 Al-ABY51872 LLSPPRNNASVETT VSL S-----QSS  
 At-FRIGIDA MLSPPRNNVSVETT VTVS-----QPS  
 Th-AAY90142 ---PEHDASREIATAIVC-----PPP  
 Vv-XP002283789 --LASNTLETS-----SPE  
 Rc-EEF51656 --ITTPTIVTDNQTTITD-----AKK  
 Pt-XP002320559 LEKLQEKRDAAIF S ISNA-LQKHRKVSSVEPAVVS YDDQFGSPAIDDQPPEAMTAE S-NL

Ca-ABK42079 LKSLQQRDAAVSAITVA-MEKHKKPNCVEPAGTTHEVQGESMFEAKPLDFIPLN-TE  
 Sb-XP002457174 LERLQEKRDAALAMIFSK-SRLSLPVPAINPMNKALDN-----LGVKWPKP-AS  
 Zm-NP001151902 LEKLQEKREAALAMIFSK-SRLSLPVPTINPMNKALNN-----LGVKWPKP-AS  
 Os-NP001062667 LEKLQQRDAALAVIFGK-SKLNLSTPLINPISKSVNNNAVFNGNIGGSLSVKWPKP-AT  
 Os-NP001062668 LERLQQRDAALAMIFGK-SKLNLSTPLINPISKSVSNNAVLNGNIAS----LWPKP-AT  
 Os-NP001060162 LNQFQELRDTAVSALSEVRQKYKVELAGILDANGSKDKKVRTSTNDMNALCASEENTTAS  
 Zm-NP001141761 LNQLQELRDAAVSSLAEVRQKYKVELAEILEASGSKDKKVVSTINDNNASRASEENTPAS  
 Pp-XP001752883 LSRVQEQKDSAIASLFEE--KRNTTTAALLTSNTVSPS-----PTTTSPTSNGL  
 Ps-ABK24390 PKNTSEKKSVAEKSIGNP-----  
 At-FRL1 -----YRIDASDA  
 At-FRL2 -----NSG  
 Rc-EEF33358 -----P  
 Vv-XP002276345 QNNAVSLPPQNNAVSLPP-----QESAI SRPTQ  
 Vv-XP002276317 -----  
 Sb-XP002466091 PQWEREPSPLPEPQSSPLPEPAPALQPRPAPESAPAPQ-----PEPA

Aa-AAZ92551 QEPAETVPETSN---KTEGERLCELMSKGLRKYIYANISD--RAKLMEEI PSALKLAKE  
 Al-ABY51872 QEPAETVPETSN---KTEGERLCELMSKGLRKYIYANISD--RAKLMEEI PSALKLAKE  
 At-FRIGIDA QE---IVPETSN---KPEGGRMCELMSKGLRKYIYANISD--QAKLMEEI PSALKLAKE  
 Th-AAY90142 PEEAETAPEMITSNDKAEGQRLCESMCSKGLRKYIYANISE--RAKLMEEI PAGLKLAK  
 Vv-XP002283789 SADLHSEMPAQT SVS-ELGFLCGMMSRGLRKYI I SHLS--VAKLREEVPAALKGAPK  
 Rc-EEF51656 ETVINSAPPAKSSSSSELISLCEMMCGRGLRKYLT SNLTN--IPKLRNEVPTALKYAPK  
 Pt-XP002320559 G--EIIDPSENGNLEYPQLVELCEQMDSEGLHKFISDNRKN--LAVLKEEIP LALKAAAN  
 Ca-ABK42079 DNMXSFKNDVVEVKLYPELIKLCQDMDSEGLHKFISDNRKN--LAAVREEI PSALRTAVD  
 Sb-XP002457174 EESVHLQDGNAAVRPRSELASLCEEMNVKGLHKFISDNRKN--LAAIREEIP SALKKTS  
 Zm-NP001151902 EESVHLQVDNAVVT PRSELVALCEEMNVKGLHKFISDNRKN--LAAIREEIP SALKKTS  
 Os-NP001062667 AHGAYLQDENTAVKPRS QLVVLCCEEMNVNGLHKFISDNRKN--LTSIREEIP VALRGATD  
 Os-NP001062668 AHGAYLQDGTAVKPRS QLVILCEEMNVNGLHKFISDNRKN--LTSIREEIP VALRGATD  
 Os-NP001060162 GLGEPSEASPVDVKPRPV LKQLCEQMDTAGLLKFLSENWKK--LSSRLDEL SAALRCATD  
 Zm-NP001141761 GSGEASEALPVETKPRPV LKQLCEQMDTKGLLKF LSENCRK--LASFRDEL SVALKCATD  
 Pp-XP001752883 TPTPAPTALGAEVRVRPELKV LCEIMDGDGLRKYIVNHKKD--VGALRNELPSALQCAID  
 Ps-ABK24390 --NKTSPALKDDVKPCPQLKSLCEKMDGEG LKQFLADSPSD--FRVIRNEVSAALRCAAD  
 At-FRL1 GKSSSSEEVSEQPVVEPELRLALCEKIDGIGLIKYLIRIWD--ETPLNQEVSAAIRYSPD  
 At-FRL2 NIETPTAVTTETPVLWPELRFKCEKNDGKGLGNMYMIENSRK--RLSINEELPN AIRCSEN  
 Rc-EEF33358 GPETVQPEPVQDNPTRKALVPFCEKMDGRGLRDIYI SEHSRE--REAIRAELVGLMGLVSD  
 Vv-XP002276345 NSAVSRPPQNNANPSHPQLRLLCSAMDAEALRRYIMDHPND--RETLRSELLDAFQVARD  
 Vv-XP002276317 -----EILQKYVPPSHPR LKLLCSNMDANGLTRYI I DHKSD--RQEIASELPDAFRVAPV  
 Sb-XP002466091 PNPDSERQDGAGDAYAAELEHRCQQMNCRGVRRFVTAQVRDGGVEWLRQVGP GALRRAPD

\* .: :: . . :

Aa-AAZ92551 PAKFVLECI GKFY LQ--GRRRAFTKESPMVSARQVSL LILESFL LMPDRGKGKVK-----I  
 Al-ABY51872 PAKFVLD CIGK FY LQ--GRRRAFTKESPMVSARQVSL LILESFL LMPDRGKGKVK-----I  
 At-FRIGIDA PAKFVLD CIGK FY LQ--GRRRAFTKESPMSSARQVSL LILESFL LMPDRGKGKVK-----I  
 Th-AAY90142 PAKFVLECI GK FY LQ--GRKAFSHD SHMI PARQVSL LILECFLLMIEPGE EKVK S---MI  
 Vv-XP002283789 PAKLVLECI GRFF LQ--GSKAFGKATHMVP SRQASLL ILEFFLLS--DCTEMEP-----  
 Rc-EEF51656 PAKLVFDCFGGFY LQ--GSRAYTKDSPMV PGRKAS ILVLELFL LLDGDIQFDS-----  
 Pt-XP002320559 PAQFVLNSLED FYPKEVSNVDGKKDSTLLGVRRTCIMLMECL SILLMY--ADLVSVSDVI  
 Ca-ABK42079 PADLVLD SLKGFY PSEVLI SDAKKDANLLGLRRTCIMLMECL SVLLTT--LELDSISSLI  
 Sb-XP002457174 PYGLVLD SLED FYSGDNLVLDGKKDGDLLGVRRTCIMLMECL SLGQLQTNNITCFSLEGHML  
 Zm-NP001151902 PYGLVLD SLED FYSGDNLVLDGKKDGDLLGVRRTCIMLMECL SLGQLHTAGITCFSLEGHML  
 Os-NP001062667 PYGLVLASLED FYFGDNL ILDGKKDGNLLGVRRTCIMLMECL SLAQLQTDATTGFI SEGQVL  
 Os-NP001062668 PYGLVLASLED FYFGDNL ILDGKKDGNLLGVRRTCIMLMECL SLAQLQTDATTGFI SKGQML  
 Os-NP001060162 PARFVLGSLEGF FSPDHTSSPGNKQI I LQGQRRS C I LMEAITPALATK---EPGDNHPW  
 Zm-NP001141761 PARFVLNSLEGF FPPDQ TNSPGSKHNALEVQRKSC I LMEAIAPALGMK---EPGGDDPW  
 Pp-XP001752883 PARMVLGTLEGYHL PEPTSVAKDKESGASANRRAC I LLECLAVVLADP--VLGADHPVV  
 Ps-ABK24390 PAKLVLQALKGFY PACNYR---ELPIDLV TQRYACNLLLECLPFVLS PD-----EV

At-FRL1 TASMVLDAIEGSNY--TPS----SSGRSFDVRRVFLVLLMEVLIEINAN-----I  
 At-FRL2 PAPLVLDIAIEGSYH--CSSPSSSSSARAIDVKRIFVLLLEALIEINAN-----L  
 Rc-EEF33358 PGMILDAMEGFYL--SKS-KGDRDVDLYRLRKSCLDLLEVLSEIKPKP-----KF  
 Vv-XP002276345 PAKMVLDAITGFFP--SNA-NEDGSSELHTMRRSCVFMLEQLMLFSPE-----I  
 Vv-XP002276317 PAKLVLDALQEFFP--PNE-VDNEGKLGSLMQTRLLLLLEQLTAVLPE-----I  
 Sb-XP002466091 PAALVLR AIGRYIIR-----AESPDVEAACTLLLELYVRAGCPRLPWGQG--RDA  
 . ::: :

Aa-AAZ92551 ESCIKDEAETA AVAWRKR-LMSEGGAAAAE--KMDARGLLLL VACFGVPSNFR-SMDLLD  
 Al-ABY51872 ESCIKDEAETA AVAWRKR-LMSEGGAAAAE--KMDARGLLLL VACFGVPSNFR-SMDLLD  
 At-FRIGIDA ESWIKDEAETA AVAWRKR-LMTEGGAAAAE--KMDARGLLLL VACFGVPSNFR-STDLLD  
 Th-AAY90142 ESSVKEEAEEAAFAWKRR-IMNEGKLATAE--AIDARGLLLL IACFGVPSSFR-SMDLLD  
 Vv-XP002283789 --SVKEEADLA AVTWKR-LINEGGVSNAS--DIDARGLLLL VASFGIPALFR-NEDLRN  
 Rc-EEF51656 --DLRQEAAQAAA AWKR-LIAEGGVSKAC--EIDARGLLLL FVGCFGIPKVFT-SGDIWD  
 Pt-XP002320559 SEDVKDQAKAIAEEWKPRLDSDVDANNGN--SLEAHAFLLQ LLATFGIASDFD-EEELSR  
 Ca-ABK42079 SESVKGRAKAI AKWKPKLDELEIDANNGN--SLEAHAFLLQ LLATFINSNFN-QEKLYK  
 Sb-XP002457174 TTNIVERAKKIA FEWKS KLDNLDIDASNGN--CLEAHAFLLQ LLATFGISAEYN-EDDLCK  
 Zm-NP001151902 TTNIERAKKIA FEWKS KLDNLEIDASNGN--CLEAHAFLLQ LLATFGISAEYN-EDDLCK  
 Os-NP001062667 TASIKERAKKIA LEWKS KLDSLDFDASNGN--CLEAHAFLLQ LLATFGIFAEFA-QDELCK  
 Os-NP001062668 TASIKERAKKIA LEWKS KLDSLDFDASNGN--CLEAHAFLLQ LLATFAIFSEFA-EDELCK  
 Os-NP001060162 SSEIRELAKAIAEEWKSKLA EVDLDASDGY--SLEAQAFLLQ LTTFNVDVLD-EDELCK  
 Zm-NP001141761 SSEIKEQAKEIAEEWKSKLAE IDLDASNGY--SLEAQAFLLQ LTTFNVDVLD-EDELCK  
 Pp-XP001752883 PSNVKESAKQVADQWKS RMN-LQGDT-AGN--SLDAQAFLLQ LVATFGIATEYN-DDELCK  
 Ps-ABK24390 SSEAKKDAQKIA ASWKS KLN--LDAESRIK--FVEAHAFLLQ LLASYGISKEFK-DDDLCE  
 At-FRL1 TVDTRNR AKKLAYHWK-----SKVGK-----PFEALVFLHLVA AFELGSEFD-TEELSD  
 At-FRL2 TNDLRERARTI AYDWK-----PNIGNK-----PSEALGFLHLVA AFELGSLFS-TEEICD  
 Rc-EEF33358 SDEVKIKAKNLA FEWK-----EKVSLNGDS--PSEALGFLNLIVAFELKDMFDDVNELLN  
 Vv-XP002276345 GEDVQR AKSLAQEWK-----GKVKVGDNT--LK-PMGFLHLLAAYGLGSDYDSTELLEL  
 Vv-XP002276317 KADVMQRAKYLAQEWK-----GKINRGAVT--SNGFLGLYLLAAYGMGSDFDSSSEYVEF  
 Sb-XP002466091 ELLLRQEAREVALTWRS RLLRSGGGVGNAPGAAGARGLAFFMAAFVGPVEFP-AQELCD  
 \* \* \* : : : :

Aa-AAZ92551 LIRMSG SNEIAGALKRSPFLV-PMISGIVESSIKRGM-----HIEALEMVYTFGMEDKF  
 Al-ABY51872 LIRMSG SNEIAGALKRSPFLV-PMISGIVESSIKRGM-----HIEALEMVYTFGMEDKF  
 At-FRIGIDA LIRMSG SNEIAGALKRSQFLV-PMVSGIVESSIKRGM-----HIEALEMVYTFGMEDKF  
 Th-AAY90142 LIRQSGTSEIAGALKRSPFLV-PIVSGIVDSCLKRGT-----NIEALEIVFTFGMEDKI  
 Vv-XP002283789 LIRLSCPKEISDALRRSRFLV-ARVPDVIQGMIKNQM-----NVEAVDFAYTFGLEEFK  
 Rc-EEF51656 LIRSSNLQQISDALKRSHVLV-TKVS DILERMNNGM-----KIEAIDVAYTFGIEDKF  
 Pt-XP002320559 LIPMVSRRRQA AELCRFLGLS-EKMPGVIEVLVNSGR-----QIDAVNLAFADL TEQF  
 Ca-ABK42079 LIPMVSRRRQTADLCRSLGLS-DSMPGVIDVLI SNGR-----HIDAVNLAFAFEL TEQF  
 Sb-XP002457174 LLPYVSRRRQTPELCRLLGLS-QKMPGVIEVLVESGR-----PIDAINLAYVFEL TEQF  
 Zm-NP001151902 LLPYVSRRRQTPELCRLLGLS-QKMPGVIEVLVKSGR-----TIDAINLAYVFEL TEQF  
 Os-NP001062667 LLPSVSRRRQTPELCRILGLS-QNMPGVIGVLVENGR-----TIDAINLAYAFEL TNQF  
 Os-NP001062668 LLPSVSRRRQTPELCRILGLS-QNMPGVIGVLIENGR-----TIDAINLAYAFEL TDQF  
 Os-NP001060162 LVVAVSRRKQTAELCRSLCLN-ERIPDI IKELVNRHR-----QIDAVQFIHAFGLSESF  
 Zm-NP001141761 IVVAVSRRKQTA VSCRSLGLN-EKVPGIEELVNRHR-----QIDAVHFIQAFGLSETF  
 Pp-XP001752883 LVTAVARRRQTPALCRSLGLT-AKIPDVVDR LAKEGK-----QIEALSFAHSFGIMDRV  
 Ps-ABK24390 LVPSIYRHPETPELCRALQIS-HKIPDVVEKLS SSGK-----QIGAIQFIYAFGLVEKF  
 At-FRL1 YVFMIAKYKQATLVCNKIGVDRKRVGKLIK TLLDSGK-----PILAVKFM YECGMTDEF  
 At-FRL2 YIFLISKYKQATTICKIKIGLDRNRIGVLVQKFLDTGR-----LLVAIRFIYENEMVGEF  
 Rc-EEF33358 YFVVIARFKQATVLARDIGLG-DKINDLVQK LIDSGK-----QLLAVKFI FEFGLTDKF  
 Vv-XP002276345 LIDVVR--YREVFGLCRGLNLVDKVPDLIQNLIGSGK-----PNLAVK FVLEFKLTHKF  
 Vv-XP002276317 LANVVVVQNRQQGFTLCCRLN CVDKVPGVYLRKLC SVSSAMWACVAKEALYLCQIGLTDKC  
 Sb-XP002466091 LVNAADVAACVEVLKASKLFV-RKMRD VVIEMINKAM-----YLQAMRIILAFEFQ EAF  
 : : :

Aa-AAZ92551 SASSVLTSFLRMSKESFERAKRKAQ-SPLAFKEAAAKQLAALSSVMQCMETHKLDPVKEL

Al-ABY51872 SASSVLTSFLRMSKESFERTKRKAQ-SPLAFKEAAAKQLAALSSVMRCMETHKLDPAKEL  
 At-FRIGIDA SAALVLTSFLKMSKESFERAKRKAQ-SPLAFKEAATKQLAVLSSVMQCMETHKLDPAKEL  
 Th-AAY90142 SPSSLLTPFLRKSKESEFELAKRKAH-SPTAFKEAIEKQLAALLSVTKCLEAHKLDPAKEI  
 Vv-XP002283789 PIWKILTSFLREHKEEWKRTREED--SPIRLKKANENYLSAMKSVTRCLEDHRVDPKLL  
 Rc-EEF51656 PPQKLLTSFLRDSKEALKRRRREANNSPVLLKEASQKHLSTLKSAMKFLEGRKLDPKKLL  
 Pt-XP002320559 SPVTLLKSYLKEARKVSSSFKPGNASPITGQNEVNERELAALKAVIKCIEEHKLEEYYPG  
 Ca-ABK42079 PPVSLKSYLNDASKASTPLNSGNASP-TVQNEVNEKELSALKAVLKCIEDHKLEEYYPV  
 Sb-XP002457174 EPVQLLKAYLRDVKKVS-HARNVKGSP-GAQNEMNERELSALKSVIKCIEEHKLEEYYPV  
 Zm-NP001151902 EPVQLLKAYLRDVKKLS-HARNVKISP-GAQNEMNERELCALKSVIKCIEDHKLEEYYPV  
 Os-NP001062667 EPVELLKAYLQEVKSVF-HFKTGKISL-QVQNEMNERELSALKAAIKCIEEHKLDEKYPI  
 Os-NP001062668 EPVELLKAYLQEVKSMS-HVKTGKMSPI-GVQNEINERELSALKAVIKCIEEHKLDEKYPI  
 Os-NP001060162 PPAPLLKTYVEEQKDTIENNGDNAAS--LKDDPKTRELLALRAVIKCIIEYKQLQKDYPL  
 Zm-NP001141761 PPAPLLKTYVEEQKDTIENNGDATAIS--LTDDPKSRELIALRAVIKCIIEHKLQKECSL  
 Pp-XP001752883 LPIPLLKAYLKEARRTAQSILKSGSSSAAQNDATMKELAALKAVLKCIEEYQLESQYPS  
 Ps-ABK24390 PPVPLLKAYLEDEKRVSQELAQQGGYPVNAQNYAAKREIASLNTVIKCIEDYKLESQMSI  
 At-FRL1 EPIPVLSYIKDCREALRVCVEDNYSLKSQNEASDKEVSALKPLIKIKDQNLSEFTQ  
 At-FRL2 EPVSILKTSLKNSREAAKRVCAGNYSLKVQNEATDKELSALRAVIKVVKEKNIIESEFME  
 Rc-EEF33358 QPAPLLRDHLKESKEFTDKVCKEEKNSVKAQNEARSREVNALKSVLRYIDEHNLEFDYPH  
 Vv-XP002276345 PLIAILKDIVESSRDVARKVRKDGKHSLSQNEATSKEISALKLVTKYIKDYDLNNEYPG  
 Vv-XP002276317 PLAPILKAHVKKFENLAQNVYDSRNQSLQYLNGATGAEITILKQIISCLIEYKLEAEYPR  
 Sb-XP002466091 PLAPTLALIEKLEHDTKDENEQ-----ASERDEEDLALLSSI SKCMEDHKLSPSEFT

\* :. . : : :. :.

Aa-AAZ92551 PGWQIKEQIVNLEKDTLQLDKEMEEKARSISLMEEAVLAKRMYNQOMKRPRLSPMEMPPV  
 Al-ABY51872 PGWQIKEQIVNLEKDTLQLDKEMEEKARSISLMEEAVLAKRIYNQOMKRPRLSPMEMPPV  
 At-FRIGIDA PGWQIKEQIVSLEKDTLQLDKEMEEKARSISLMEEAALAKRMYNQOIKRPRRLSPMEMPPV  
 Th-AAY90142 PGWPIKEQIVKLEKDTLQIDKQMEEQARSISLMEEAVLTKRLYNQOMKRPRLSEMEMPVA  
 Vv-XP002283789 SGWHIDEKIQLEKEMADLDKMKMEGKVMKLRKADEIDSLKMKMTREIKHSPIAAP----S  
 Rc-EEF51656 PGWQVTEKIDKLEKEIADLNRKIDDKVAPKRKADENEFINSLSQEVKRLRFTGSPLISS  
 Pt-XP002320559 D--PLQKRLLQLEKAKAEKRRATEAAKQPKRPRASGVGCGPRVTSSVPERTFYP----R  
 Ca-ABK42079 D--PLQKRVLQLEKAKADKRRAVEAAKQPKRPRANGSAFAHRA-TGFADKSFYPA--AA  
 Sb-XP002457174 D--PLQKRVLQLEKAKADKRRAVEAAKQPKRPRANGSTFAPRA-TGFADKSFYP----A  
 Zm-NP001151902 D--LLQKRVIQLEKAKADKRRAVEAAKQPKRPRANGSVYAPH--TSFPDKSFYQ---AA  
 Os-NP001062667 D--PLQRRVIQLEKAKADKRRAVEAGKQPKRPRANGSVYAPHI-TSFSDKSFYQ---AA  
 Os-NP001062668 G--PLQKRVAELK-SKGEKRP-LEAGRHNAAKPRTFGNSAARRPPNPVGSAGRRPSPGAG  
 Os-NP001060162 G--PLQKRVSELK-PKGEKRPSSDAGRITYAKKPRGPGISFPRRPAGSVGSAARRPPFPGY  
 Zm-NP001141761 M--PLQKRVLHLEKAKSDRKRAAVAVKAQTKRPRAS-----  
 Pp-XP001752883 K--DLQKRVGEVQKSMKRRKNAKSIKFLTKQARLYSGAGVVAGAGAASVAGAGVASVAG  
 Ps-ABK24390 E--KVEERVEELEKNKALRKR----NTTNPPKQEPQKQKGR-----TRDCKN  
 At-FRL1 E--KLEECVKELEDQKAQRKRATKFNSPANPQQPQEQKVDNK-----RPRVAN  
 At-FRL2 L--DLEKRIEMLEKQKADRKVAAPSPDNRPRQPKKQQLSCKQ-----QQHQGKQOAKK  
 Rc-EEF33358 A--PLEERIQKLESQMAARTAAKRPALAPAPRPKQKQKQSKQAQTATASPSVPSGAA  
 Vv-XP002276345 E--HLEMRIKMLEREMKDR----KRSAAALVPRHQQQQELGSKHPWTKP-AGAAVPSVAG  
 Vv-XP002276317 S---FAAKIALLEERVGKPKQACTGVKRRKRAEECVG-----  
 Sb-XP002466091 . : : :

Aa-AAZ92551 ASSSYSPLYLDRSFPSQ-----RDEDRDEISALVSSYLGPSSSFPHRSSLRSSPEY  
 Al-ABY51872 ASSSYSSIYLRDRSFHSQ-----RDEDRDEISALVSSYLGPSSSFPHRSSLRSSPEY  
 At-FRIGIDA TSSSYSPIYRDRSFPSQ-----RDDDQDEISALVSSYLGPSTSFPHRS--RRSPEY  
 Th-AAY90142 ASSSYSPIYRDRNFSSH-----IDGDRDEISALVSSYLGPSSSFPHRSSLRSSPEY  
 Vv-XP002283789 SVIGLQEQRVADNMASRS-----FYDSTMPINFLDSGFPGHISTYPAASAMHLHGSGG  
 Rc-EEF51656 PSFGLHEQRVPSHLDGNG-----SYNASTRINMVDGGFSCLISNPPVAGSMLYGS  
 Pt-XP002320559 VPERYP-----QYVYDRPYIYTGADNHPQLMSSAAT-----  
 Ca-ABK42079 -----  
 Sb-XP002457174 TPERHP-----SNPYERQFVYG--AEAHLPP-MVSSAS-----  
 Zm-NP001151902 TPERHP-----SNPYERQFVYG--AEAHLPP-MMSSAS-----

Os-NP001062667 PPQRH-----SYPYERQYVYG--AEAHHTPTMISSAP----  
 Os-NP001062668 APQRH-----SYPYERQYVYG--AEAHHTPTMISSAP----  
 Os-NP001060162 TWQRPPPPMPS-----YPDYRGHADRYHYTAPSATYDPPAYASYSEPYSA  
 Zm-NP001141761 TWQRAPAPMPSPRGPAVPVSRAPLPAPLPDRYGAADRYHYTPAPAYDSGAFSSYSEPFSA  
 Pp-XP001752883 -----  
 Ps-ABK24390 AASVAGAVG-----LLPKPSPPSAFALFNSSALLPKPTPPSAFALSNS  
 At-FRL1 GS--QVPVPSQ-----QLLSRPEAL--LMPEHSHHGLQLNPYGLMTS-  
 At-FRL2 GSSMEYNLTIP-----PLRPQQQPP--LLPTPSQI-LQVNPYGLLSS-  
 Rc-EEF33358 QQLKGNKRPRM-----AMLPGPAAVPISIAGPSSAGASAGPYGLAGAG  
 Vv-XP002276345 GTSSTAAPFQQ-----PHLQAPGLVPD--GPVFMNPSAGLYGFAGVP  
 Vv-XP002276317 FLPDRSVPYLS-----SSVELQGLAGPTLSTARYTAPSAGLYCSAGVP  
 Sb-XP002466091 -----

Aa-AAZ92551 -----MVPLPPGGLGRSVYAYEHLPPNSYSPGHGQRLPRQ  
 Al-ABY51872 -----IVPLPPGGLGRSVYAYEHLPPNSYSPGHGQRLPRQ  
 At-FRIGIDA -----MVPLPHGGLGRSVYAYEHLAPNSYSPGHGHLRHRQ  
 Th-AAY90142 -----MVP--PGGLGRSVSAYEHLPPSSYSP-----  
 Vv-XP002283789 GSLPENITGTMSGSGSTRVHGTGTGPGMAGTGGVPSMASFSGAHGEMLFDRTGQMMKNN  
 Rc-EEF51656 -----YSAAYGVPSTSSFAGVYRETLADRTGNITGSN  
 Pt-XP002320559 -----YNFSP---SHGNYFGNGY--QYQTPYHH--  
 Ca-ABK42079 -----  
 Sb-XP002457174 -----YTMQP---AHGPYYGNGYPVQYQVPYIH--  
 Zm-NP001151902 -----YPMQP---AHGPYYGNGYPVQYQVPYIH--  
 Os-NP001062667 -----YGISP---AHTTYEYKDGEPNRG-----  
 Os-NP001062668 -----YGMSP---AHTTYGNGYQVQYQVPYIH--  
 Os-NP001060162 -----SKPYQYTPGSVAPASYNNSNQFKVAYGGPGAPPT  
 Zm-NP001141761 -----PKPFQYTPGSVA--ASYNSSPYKVAYGGPGAPVR  
 Pp-XP001752883 -----  
 Ps-ABK24390 -----SDLYRPAPVASIPSYNLPQGQVYDRGSQSIYRS  
 At-FRL1 -----AFSGVVVNP---LTGLFGSGATPQS--LYYAQ  
 At-FRL2 -----ILPGVAVPYGN--PRALFGSVAPASRPVFYVQ  
 Rc-EEF33358 -----MCFPGNPSVPR--AHPYSSNSHMSSSYDRSAA  
 Vv-XP002276345 -----MGFPGNLGPPMPHLHPMEPQLPMP-----FA  
 Vv-XP002276317 -----MSFPGNLSPARPHVQALDSQMPIPSGYFDRPSG  
 Sb-XP002466091 -----

Aa-AAZ92551 YSPSPVHGQRHPRQYSPPIHGQQQIPFGLQR----VYRHSPSEERYLGLSNHRSPRSNSS  
 Al-ABY51872 YSPSPVHGQRHPRQYSPPIHGQQQIPFGLQR----VYRHSPSEERYLGLSNHRSPRSNSS  
 At-FRIGIDA YSPSLVHGQRHPLQYSPPIHGQQQLPYGIQR----VYRHSPSEERYLGLSNQRSRSNSS  
 Th-AAY90142 -----VHGQRLPREYSPVHGQQQIPYGLQR----VYRHSPSVERLLTLPHHRSPR--NSS  
 Vv-XP002283789 GPPY--AGRRD-MGFNDRVIGQSFIAHPASMGVDSIFGPSTSMESFPGMPNAPSINAANG  
 Rc-EEF51656 VSAFGWHGVGD-ASIIDGTRGQSLVHQSGSG----LFGP--SIEGFAGLPNSSPAGANQ  
 Pt-XP002320559 -----  
 Ca-ABK42079 -----  
 Sb-XP002457174 -----  
 Zm-NP001151902 -----  
 Os-NP001062667 -----  
 Os-NP001062668 -----  
 Os-NP001060162 AGGYGSYNDAAGQSTSSSYSGYSYHPSLPLRL-----  
 Zm-NP001141761 S-TYPGYASASGPAASSSYANYMGSVYRPPQQP-----  
 Pp-XP001752883 -----  
 Ps-ABK24390 ACDVGSNPSFSLRSRSHLYPSDSVQ-----  
 At-FRL1 QTGYVLPP-QYHPPYYSQ-----  
 At-FRL2 QTGYGMPPPQYRPPYYPQ-----  
 Rc-EEF33358 FGGYGFPP-QYCPGYYPQ-----

|                |                         |
|----------------|-------------------------|
| Vv-XP002276345 | HGGYGLQS-LYPPAYFHQ----- |
| Vv-XP002276317 | LGGYNLQP-HYHWTYYPS--    |
| Sb-XP002466091 | -----                   |

|                |                  |
|----------------|------------------|
| Aa-AAZ92551    | LDPK-----        |
| Al-ABY51872    | LDPK-----        |
| At-FRIGIDA     | LDPK-----        |
| Th-AAY90142    | QDHIGM-----      |
| Vv-XP002283789 | SSASDLYQFADAVFGR |
| Rc-EEF51656    | SSASDLYRFADAVK-- |
| Pt-XP002320559 | -----            |
| Ca-ABK42079    | -----            |
| Sb-XP002457174 | -----            |
| Zm-NP001151902 | -----            |
| Os-NP001062667 | -----            |
| Os-NP001062668 | -----            |
| Os-NP001060162 | -----            |
| Zm-NP001141761 | -----            |
| Pp-XP001752883 | -----            |
| Ps-ABK24390    | -----            |
| At-FRL1        | -----            |
| At-FRL2        | -----            |
| Rc-EEF33358    | -----            |
| Vv-XP002276345 | -----            |
| Vv-XP002276317 | -----            |
| Sb-XP002466091 | -----            |

Sequences used for phylogenetic analysis in Supplemental Figure 11B (FASTA format)

>At-SUF4

MGKKKKRATEKVWCYCDREFDDEKILVQHQAQKHFCHVCHKKLSTASGMVIHVLQVHKENVTKVPNAKDGRDSTDIEI  
YGMQGI PPHVLTAAHYGEEDEEPPAKVAKVEIPSAPLGGVPRPYGMVYPPQQVPGAVPARPMYYPGPPMRHPAPVWQMPP  
PRPQQWYPQNPALSVPPAAHLGYPQLFPIQVQNMGMPTPTPSAPAIQPSVPTGVTTPPGIPTSSPAMPVQPLFPVVNNSI  
PSQAPPFSAPLPVGGAAQQPSHADALGSADAYPPNNSIPGGTNAHSYASGPNTSGPSIGPPPVIANKAPSNQPNVYLVWD  
DEAMSMEERRMSLPKYQVHDETSQMNSINAAIDRRISESRLAGRMAF

>Vv-XP002274291

MGKKKKRVAKVWCYCDREFEDEDVPSKLAKEIIPSSQLGGGAVPGTLGIGVPPQALGAMPPVYNPALAVPPAGWPVPRPQ  
YGMQGI PHEILAAHYGEEDEDVPSKLAKEIIPSSQLGGGAVPGTLGIGVPPQALGAMPPVYNPALAVPPAGWPVPRPQ  
PWYSQHPAISIPAPLGMTQQPLFPIQVVKPPLPSTMSSALQPSLQITPPGLPIPSPSAPLPQPLFPVGVNNNLPTKNSP  
FSTPMLSTSIPLSSQAEINSSIEAHSSTNSGPSINSHSYASGPNTGGPSIGPPPVIANKVPATQPAGNEVYLVWDDEAMS  
MEERRMSLMKYQVHDETSQMSSIDAAIDRRILESRLAGRMAF

>Rc-EEF34249

MGKKKKRVASKVWCYCDREFDDEKILVQHQAQKHFCHVCHKKLSTAGGMVHVLQVHKESITKVPNAKPGRESTDIEI  
YGMQGI PPDVLAHYGEEEDNPSKVAKVDLPSPLGGIMPVGVGYPPQTLGVVQPIYSSVVPVPPAGWPVSRPQPWF  
SQPPAVSIPSTAPTGYAQQLFPVQVNRPLPSATSPALQLSQVAPPGLPSSTPPIPVSQPLFPVVISNNLPQSSPFSTHL  
PTPNIPSSTLGEVKGSDVLSGANNSLTTSYHTPGIPGLITCPLLDTRI

>Pt-EEE79242

MGKKKKRAASKVWCYCDREFDDEKILVQHQAQKHFCHVCHKKLSTAGGMVHVLQVHKESVTKVPNAKPGRESTDIEI  
YGMQGI PPDVLAHYGEEEDENPSKAAKVDIPSAQLVGGMVPGPLGAGYPRPLAAMQPMSPGCTLGPVKLWNYLYNSAVP  
APHAGWPVPPRSQHWLPQHPAVSI PPPAPITYTQQPLFPVQVNRPPVPTMTPALIPSQVTPPGLPSSTPSVSQPLFPVN  
NNLPQSSFTSAPFPSTSLPSSPAEVRGSMNVHLGVNTSMTTGYLTSASASGTLGNTHSYASGPNTGGPSIGPPPVIAN  
KAPVIQPAVNEVYLVWDDEAMSMEERRMSLPKYQVHDETSQMSSIDAAIDRRILEGRLAGRMAF

>Sb-XP002462836

mgkkkkrvdkvfcyycdrefddekilvqhqaqkfhkchvchkkklstasgmsihvlqvhkesvtkvpnakpdresteieif  
gmqgipahvlaahygeeedpsakmakvevpqvrpvimpnslgmafpprpaygvappiynpalnplmarppiwpqppaqaw  
ypqqaayppqavsvppvavaglpqqplfpinqvptpmtsapavnlqtsfpmappgvpsvapqvsqplfpvntsavnga  
asspflasvpgtipasspaavgaagigygnngtggpavgsspavsnkasgaqpatnevylvwddeamsmeerrlal  
pkyqvhdetsqmnsvdaaidrrisesrlagrmal

>Os-EEE70223

MGKKKKRVEKVFYCDREFDDEKILVQHQAQKHFCHVCHKKLSTAGGMVHVLQVHKESVTKVPNAKPERESTEIEIF  
GMQGI PPDVLAHYGEEEDPSSKVAKEVPSLRPPVMPNPAGMVYPPRPAYGVAPPYMPALNPLMARPPPIWPAPPPQPW  
FTQPVVSVPMASGLAPQQPLFPIQNMPPAPMTSAPANLLQTSFPMHVGVPSPVTPQVSQPLFPVSTAGNGAVSSPYVA  
SVAPGSIPTSSPSVAPAGVGYAATNQGTGGPAAVPPPASNKAPATQPGANEVYLVWDDEAMSMEERRLSLPKYQVHDET  
SQMNSVDAIDRRISESRLAGRMAL

>Os-NP001063931

MGKKKKRVEKVFYCDREFDDEKILVQHQAQKHFCHVCHKKLSTAGGMVHVLQVHKESVTKVPNAKPERESTEIEIF  
GMQGI PPDVLAHYGEEEDPSSKVAKEVPSLRPPVMPNPAGMVYPPRPAYGVAPPYMPALNPLMARPPPIWPAPPPQPW  
FTQPVVSVPMASGLAPQQPLFPIQNMPPAPMTSAPANLLQTSFPMHVGVPSPVTPQVSQPLFPVSTAGNGAVSSPYVA  
SVAPGSIPTSSPSVAPAGVGYAATNQGTGGPAAVPPPASNKAPATQPGANEVYLVWDDEAMSMEERRLSLPKYQVHDET  
SQVSSDFYNFISVILMICEKNQVEVHGDA LNWNIV

>Zm-NP001136975

mgkkkkrvdkvfcyycdrefddekilvqhqaqkfhkchvchkkklstasgmahvlqvhkesvtkvpnakpdresteieif  
gmqgipahvlaahygeeedpstkvkvevpqvrpvimpnslgmafpprpaygvappiynpalnplmarppiwpapaqaw  
ypqqaayppqavsvppivavaglpqqplfpinqvptpmtsaavnlqtsfpmappgvpsvavhvsqplfpvntsavnga  
vnsplfasvpgtipasspaavgvagigygnngtrdpavgsspavsnkasgaqpatnevylvwddeamsmeerrls  
pkyqvhdetsqmnsvdaaidrrisesrlagrmal

>Pp-XP001773394

MGKKKKKTYKVWCFYCEREFEDKILIQHQKAKHFKCHVCHKKLSSASGMVIHVLQVHKESVSKI PNAKPEREALTDLEI  
YGMEGI PAEILAAHDGDYDEDENPSKVARVEVPPLL PFVGGGLMGSNAIGMAPQPMYTAMQPMCVQAITRVGSTSTPKLA  
ATTSTSPRMERSSSSWPTRPTPHAPTSTASPPNGPPPPPPSAPPLSPAGSLVKPPQPSPGSNQSSINGSPIAPPLPSP  
GASSGMNMGPGSNARLPPPPYGGEILISHMYSSGPNTGGPSIGPPPVISNKPPGVAGGTNEVYLVWDDEFFSMEERRLSL  
QKYQVHDETIQMSSVDAIDKRILEGRLAGRMSFHV





Sb-XP002462836 TGGPAVGSS-----PAVSNNKASGAQPATNEVYLVWDD  
 Zm-NP001136975 TRDPAVGSS-----PAVSNNKASGAQPATNEVYLVWDD  
 Os-EEE70223 TGGPAAVP-----PPASNNKAPATQPGANEVYLVWDD  
 Os-NP001063931 TGGPAAVP-----PPASNNKAPATQPGANEVYLVWDD  
 Rc-EEF34249 LT-TSYHTP-----GIPGLIT-----  
 Pt-EEE79242 MT-TGYLTQSASASGTLGNTHSYASGPNTGGPSIGPPPVIANKAPVIQPAVNEVYLVWDD  
 Vv-XP002274291 PS-INSHSYAS-----GPNTGGPSIGPPPVIANKVPATQPAAGNEVYLVWDD  
 At-SUF4 PGGTNAHSYAS-----GPNTSGPSIGPPPVIANKAPSNQP--NEVYLVWDD  
 Pp-XP001773394 GEILISHMYSS-----GPNTGGPSIGPPPVISNKPPGVAGGTNEVYLVWDD

\*

Sb-XP002462836 EAMSMEERRLALPKYQVHDETSQMN-----SVDAAIDRRISESRLAGRMAL---  
 Zm-NP001136975 EAMSMEERRLSLPKYQVHDETSQMN-----SVDAAIDRRISESRLAGRMAL---  
 Os-EEE70223 EAMSMEERRLSLPKYQVHDETSQMN-----SVDAAIDRRISESRLAGRMAL---  
 Os-NP001063931 EAMSMEERRLSLPKYQVHDETSQVSSDFYNFISVILMICEKNQVEVHGDALNWNIV  
 Rc-EEF34249 -----CPLLIDTRI-----  
 Pt-EEE79242 EAMSMEERRMSLPKYQVHDETSQMS-----SIDAAIDRRILEGRLAGRMAF---  
 Vv-XP002274291 EAMSMEERRMSLMKYQVHDETSQMS-----SIDAAIDRRILESRLAGRMAF---  
 At-SUF4 EAMSMEERRMSLPKYKVHDETSQMN-----SINAAIDRRISESRLAGRMAF---  
 Pp-XP001773394 EFFSMEERRLSLQKYQVHDETIQMS-----SVDAAIDKRILEGRLAGRMSFHV-

\* :





```

Rc-EEF41190      -----GGNLG--PDLYAIHQVQGGTDAGPQFVPG-----
Pt-XP002300004  -----GGSSY--PDPYGLQQVQVGS DSGPTFASGVMSNGPYDTAHG----
Vv-CAO21396      -----
Ps-ACN41197      -----SGAYG--GDGYGMHPVQGAEEESAGQYGAGAAPWGAYEMQRSHVRR
Pp-XP001759089  -----SGKHN--CDALI-----
At-FLX           -----GGQGRQYPEANGTHEVHMSL-----
Sb-XP002466208  -----AQAY--PDAYSTNQAHMHTGANSHYMSQPVSYGQYEGQHTNVQR
Zm-NP001151248  -----AQAY--PDAYSTNQGHMHTVANPHYMSQPVPYGYEQHTNVQR
Os-NP001051704  STYGSSEAAAYAAAYGNSDAYSTNQAHTRTDGNPHYMAPPVHYAQYDSQHTNVQR
    
```

Sequences used for phylogenetic analysis in Supplemental Figure 11D (FASTA format)

>At-FES1

MSDSDMDIDDDEVEQKVQVHTIVRESELFDKPPIQASNSHNDVKRHSVTTPLDEQSKI I KEQAFQAQDNGTLPFRFPAGPIP  
 PRSFFTGGGGNEPEQKRAALPCKFFAKGWCFCNGVSCFKFLHVKENSNTSQQLAENSMAGNGGIRSDLERRILDSREGVRV  
 SQLSENGVTSPLPTREDISFMNPQRVVFSSMSFVNPPGSQRVFPFNNEMRFMPSEFENIRRESLKQTYGADFTDNRSLVINNA  
 NSFALRSSFVHEHRPSSISSYLKTDMGSAWPAWTGSLSSSVPMNDRASTVGDFFENGNSLSGSGSLPTLQGVAVSSDKGAEA  
 NTTSTKKKVSSDDWEPSEPFKASFTIPPYILPSSDALYDPFTDIENLGDRLNDSLSSKGEHARKSSCQQKDGDSASGPQ  
 ARDCKNDDKSSSCSQNHQETVARSLAEGVVEGVATSVVDQNDTATPSKEISSATAAENRVVLKRIKPAGHDSWHRSDG  
 SSKKTKKSDEIDGEVRS DAGMKVMRLFRTAVVETIKEMLKPLWREGRLTKDVHNMIVKKAEEKVVGAAVQFHQVPTDTE  
 SVDQYLGLSGTRIVKLVVEGYVEKYGKP

>Vv-CAN59796

MSPSPSDGGTHPPPPWTDHNSDAVLRGGGGRRGGDGRGLPDSAIGAAGDRRGEVNFVFLVAVGDVSRDKESKGVKHLLS  
 GSSTLGKFEAGLQSDTLAVEDGSSSFKISGLSKEQTKSCVNDDHSKYPKLGYHFFPYEENRNTKSAVDGKYTEAMPEKKS  
 EIMDARNTKPFVPGKGAAVVIMRDFVFGEEANIVQCSNKEIKQIDFQSPPEMNQRASRLAASLLRRRSLSPDTSKDNK  
 RPAIICQYFSQGWCVNPNCKFMHNIDSMDNTNQOIGGDVAIATRREYEQADKGLSEIPERTTLFCFPGRVRQWENEESL  
 TWHQYNGKHRFSSLRDDLSYGFPAWSQRFPYKDGPRNYVSPNTEGSPYILGNRLFPEYGSFVSGSSTLAISSKTYQTS  
 RTLSSKATSLEGLAGKQNEFTLNDYASPVLSHQPNPRVDTTLQTTNLLPSHXSSAWGGYSFSQAGPCVQKCVDSDTKTK  
 FSSDDWEPSPFRPSYFSAFTDMSSARSVHDTVGDTCHEHPLGDRPYKVSCTQASILGSSHQRVYHDPVLPGLTGPPEY  
 NADIESIHIHDKFDQSTLDKGVYGHQRDFFTNETEPAGSSVAELQDSQLKEGKPDGHTRVEDVSDQNPVSDGASHEEE  
 LKMEWGKQSNACDDHKIDEDVQKESKALRHFRFVLIDFIKDLVRPTWHRGQLSKDAHNSIVKRSVDKVLSTLEPHQIP  
 TEEAIHHYLSVVSQPKIAKLVQIPVLMDDICMLFSSSCSHPSTNGDIWGMLEAGLYDGSK

>Pt-XP002329830

MGSHSTHEMSELREDSVSNFKCSGPLDGLPLTLQKEKSCVNYLDSWSPKLSKHLVIAQKNGPLEHAINKTDAFRNSKTHLS  
 NSSEAIAVETTEPFVITGIEVDVVL SKRNCLGQEANVVLDSKEELKPVVDKSEDSKEQTESRISRLVASGTRARSLSPST  
 ELRDGNKRAAVICDFFAKGWCIRGSSCRFLHTTNKADNTGQQLVDEVATREDQFDEGVRNILETPKFPHFPDPVAASTG  
 KEATSSHFSSERLPPLEHKENERLHQLDDKHKLSLRQRVGIPLNAKQFSSSKDDPGFSSSFKDVGIENFRQQWPATDYG  
 SYTSLINRGSSFSFSSSFDTSLLGSQKLLDSDRASRSSLLQSASAFSGSEPESSLASVPGDQLRHAHEKTKISSNDWE  
 PSVPFRPSFFITPEMISSAGSKYDPLRDSFVLPNVGDKSFKFSFFSLGASISNTSQQPIYGDSLNRNFGTEFNGDKSTI  
 SSHDKPHGSLSDKNCSTPGKDSFTTATVTGGAGTADGENGSALKEESASGIGYDKVNRVTNKIDRDARPQTDGSRHKDL  
 KADSVRQNNMEVDQKIGGDTQKESKVLRRHFRSALIDFVKDLLKPTWREGHLSKDAHNTIVKKTVEKVLSTLQPHQIPAT  
 VESIKQYLSSSQPKMAKLVVEGYISKYGKS

>Os-NP001055943

MAGGGRGAGLPAAGEAAKAGRVGVGTTKRARDPSPNSKDPNGFVGVIAAEKKPALQLHGDEKYQKKAGNDPVPPTIDDT  
 KTGGLHLHGHHVSQSPDSSNALSSQRFSSSPGGDMKNKTRKRTCTFYAQGRCKNGKSCFTLHEGEVSGSDNQVYGNHGG  
 TEGESEIQHPSSSKEHQFKNSAGSSQHEIYRTLHVHAYGEDNRGLTHPVVKHSCHMLKASHGFKIGGSLTANPTNEVVQLP  
 VVQEKNEPEYFMGHQISLGTNNCLNDMGAYSRLRLDGGKQFEVAKGDSPRDLSRSYLEKNPLKPDYRYQFPDSTISL  
 DPHQYSKLLSAYGGATENLPHKHQEEKSSSHVSYSLNSYTGFRKQGHDSDFFLVNQSLRATSHHGTLPLHQLTPDKDAS  
 HHKADFDKGGTSRSTLHVSSSQPVVASAGKLSPIKDEVWITSVPFVPSFNFPPDFPGSTSPSKSQYDPLVDSIDPPKVE  
 SLNNLKTNSISCSISSQHVDTNVIIRGGSLEKPLTFADKLARNVSAKGSNDFGLISYDRGHSSSLDGDNRVKT CERKN  
 DASLNNEKSDFRFHLVEHVKELVKPIWKEGNLSKEAHKLIVKKSVDKIFASLEPNQMPETEKAITTYITASAPKIEKLVKAYV  
 DRYRTS

>Zm-NP001148144

MMQSRDVKYLNKADNINHVLNMSGDISKIGGHCLHGTHGLGTRLDSDAQSSSPGENMNNKIRRPIEICTFDAQGRCKKG  
 KCSISLHEREGFGSAKTGLLAPAGSGNHRGSEGGVQVHISDLKVHQFKDSEGLSKDEMCRNLIYAFGKDNQMSVHLAGK  
 HSSPIPGVSRMPVSIHSLAQNPLVHEKNNKRFMGHHIDVAAENYLDAGGTYPRLDGGIFQFDIDKESSVSDSHVSR  
 LSDYPYKSFGLSISDPLQLSEKLSAYGGVTNTIPNIHQKEHHSCHASYSSHSLTGSRNPCFATSEHTFGSPSLLATSHL  
 GIQSHHLFTSDIEKADLHRCLDVGKGYGTSSSGPALLVSSKPEPSMTVPVPHSPIKNEVWETSVPFVPSFSPDSTTASE  
 SQYDPFVDYVEPPKVGNTNNLKPSTISCNITSQHTDQYAVTDKSLNLCNDKLRNITAKGSNEPAYFIAPDRGCSSSLDDT  
 IKVKACDRKKDAVDYNEKTRDFRFLAEHIKELVKPIWKKGNLSKDAHKLIVRKSVEKVVDSIEPNQVPTTEELITKYIA  
 TCGPKIEKLVKAYVDRHSTCHPTIKYSSSEMGA

Alignment used for phylogenetic analysis in Supplemental Figure 11D

Vv-CAN59796                   MPSPPSDGGTHPPPWTDHNSDAVLRGGGGRRGGDGRGLPDSAIGAAGDRRGEVNFVFLV  
 Pt-XP002329830               -----MGSHSTHEMSELREDSVSN-----FKCSGPLDG-----  
 Os-NP001055943               -----  
 Zm-NP001148144               -----  
 At-FES1                       -----

Vv-CAN59796                   AVGDVSRDKESKGVHVKLLSGSSTLGKFEAGLQSDTLAVEDGSSSFKISGLSKEQTKSCV  
 Pt-XP002329830               ---PLTLQKE--KSCVNYLDSWSPKLSKHLV-----IAQKNGPLEHAIN-----  
 Os-NP001055943               -----MAGGGRGAGLPAAG-----EAAKAGRVGVGTT-----  
 Zm-NP001148144               -----  
 At-FES1                       -----MSDSDMDID-----

Vv-CAN59796                   NDDHSKYPKLGYPFFPYEENRNTKSAVDGKYTEAMPEKKSEIMDARNTKPFVSPGKGAAV  
 Pt-XP002329830               -----KTDAFRNSKTHLS-----NSSEAIAVETTEPFVITGIEVDV  
 Os-NP001055943               -----KRARDPSPNSKDPNGFVGVIAAEKKPALQLHGDEKYQKKAGN-DP  
 Zm-NP001148144               -----MMQSRDVKYLNKADNINH  
 At-FES1                       -----DDEVEQKVQVHTIVRESELFDKPPIQASNSHN--DVKRHSVTT

Vv-CAN59796                   VIPMRDVFGEENIVQCSNKEIKQIDFQSP---EEMNQASRLAASLLRRRSLSP-TDSK  
 Pt-XP002329830               VLSKRNCLGQEANVVLDSKEELKPVVKSSEDSKEQTESRISRLVASGTRARSLSPSTELR  
 Os-NP001055943               VPPTIDDTSKTGGLHLHGG-----HVSQSPDSDNALSSQRFSSSPGGDMK  
 Zm-NP001148144               VLMNSGDISKIGGHCLHGT-----HGLGTRLSDAQSS-----SPGENMN  
 At-FES1                       PLDEQSKI I KEQAF AQDNG-----TLPRFPAPGIPPRSFFTTGGGGNE

Vv-CAN59796                   DENKRPAI ICQYFSQGWCVNGPNCKFMHNID-----SMDNTNQIGGDVAI  
 Pt-XP002329830               DGNKRAAVICDFFAKGWCIRGSSCRFLHTTN-----KADNTGQQLGVD-EV  
 Os-NP001055943               NKTRK--RTCTFYAQGRCKNGKSCITLHEGEVSGSDNQ-----VYGNHGGTGEGSEIQH  
 Zm-NP001148144               NKIRRPIEICTFDAQGRCKKGCISLHEREGFGSAKTGLLAPAGSGNHRGSEGGSQVQH  
 At-FES1                       PEQKRAALPCKFFAKGWC FNGV SCKFLHVKE-----NSNCTSQQLAENSMA  
                               ::       \* : : \* \* . \* . \* : \* :                       : . . :

Vv-CAN59796                   ATTRYESQADKGLSEIPERTTLFCFPGRVRQWENEE SLTWHQYNGKHRFSSSLQRDDL SYG  
 Pt-XP002329830               ATR--EDQFDEGVRNILETPKFPHFPDPVAASTGKEATFSSHFS--SERLPPLEHK-----  
 Os-NP001055943               PSSSKEHQFKNSAGSSQHEIYRTL VHAYGEDNRGLTHPVV KHSCHMLKASHGFKIGGSLT  
 Zm-NP001148144               ISDLKVHQFKDSEGLSKDEMCRNLIYAFGKDNQMSVHLAGKHSSPIPGVSRMPVVS----  
 At-FES1                       GNGGIRSDLERRILDSREGVRVSQLSENGVTS LPTREDISFMNPQRVFS SSMFVNP----

Vv-CAN59796                   FPADSQRFPMYKDGPRNYVSPNTEGSPYILGNR--LFPEYGSFVSGSSTLAISSKTYQTS  
 Pt-XP002329830               ---ENERLHQLDD--KHKLSLRQRVGIPLNAKQ--FSSSKDDPGFSSSFKDVGIENFRQQ  
 Os-NP001055943               ANPTNEVVQLPVVQEKNEHPYFMGHQISLGTNN--CLNDMGAYSRLRLDGGKQLQFEVAKG  
 Zm-NP001148144               --IGHSLAQNPLVHEKNNK-RFMGHHIDVAAEN--YLDAGGTYP--RLDGGIFQFDIDKE  
 At-FES1                       --PGSQRVFPFNEMRFMP SFENIRRESLKQTYGADFTDNRSLVINNANSFALRSSFVHE  
                               .                       :                       :

Vv-CAN59796                   RTLSSKATSLEGLAG-----KQNEFTLN-DYASPVLSHQPNPRVDTTLQTTNLLPSHX  
 Pt-XP002329830               WPATDYG-SYTSLIN-----RGSSFSFSSSFDTSLLG SQKLLSDRASRSSSLLQSAS  
 Os-NP001055943               DSPRDSHLRSYLEKNPLKPDYRYQPF DSTI SLDPHQYSK KLSAYGGATENLPHKHQEEK  
 Zm-NP001148144               SSVSDSHVSRITYLS-----DYPYKSFGLS ISSDPLQLSEKLSAYGGVTNTIPNIHQKEH  
 At-FES1                       HRPSISSYLKTDMG S-----AGPAWTGSLSSVPMNDRASTVGDFENGNSLSGSGS
